# Supplementary material for: Estimated impact of the COVID-19 pandemic on cancer services and excess 1-year mortality in people with cancer and multimorbidity: near real-time data on cancer care, cancer deaths and a population-based cohort study
Source: PubMed Central journal article supplement (PMC7674020; doi:10.1136/bmjopen-2020-043828), 2020-11-17
Supplement: bmjopen-2020-043828.draft_revisions.pdf [file bmjopen-2020-043828.draft_revisions.pdf]

# BMJ Open

BMJ Open is committed to open peer review. As part of this commitment we make the peer review history of every article we publish publicly available.

When an article is published we post the peer reviewers' comments and the authors' responses online. We also post the versions of the paper that were used during peer review. These are the versions that the peer review comments apply to.

The versions of the paper that follow are the versions that were submitted during the peer review process. They are not the versions of record or the final published versions. They should not be cited or distributed as the published version of this manuscript.

BMJ Open is an open access journal and the full, final, typeset and author-corrected version of record of the manuscript is available on our site with no access controls, subscription charges or pay-per-view fees (<http://bmjopen.bmj.com>).

If you have any questions on BMJ Open's open peer review process please email [info.bmjopen@bmj.com](mailto:info.bmjopen@bmj.com)

# BMJ Open

## Estimated impact of the Covid-19 pandemic on cancer services and excess 1-year mortality in people with cancer and multimorbidity: near-real-time data on cancer care, cancer deaths and a population-based cohort study

|                               |                                                                                                                                                                                                                                                                                                                                                                                                                                                                                                                                                                                                                                                                                                                                                                                                                                                                                                                                                                                                                                                                                                                                                                                                                                                                                                                                                                                                                                                                                                                                                                                                                                                                                                                                                                                                                                                                                                                                                                                                                                                                                              |
|-------------------------------|----------------------------------------------------------------------------------------------------------------------------------------------------------------------------------------------------------------------------------------------------------------------------------------------------------------------------------------------------------------------------------------------------------------------------------------------------------------------------------------------------------------------------------------------------------------------------------------------------------------------------------------------------------------------------------------------------------------------------------------------------------------------------------------------------------------------------------------------------------------------------------------------------------------------------------------------------------------------------------------------------------------------------------------------------------------------------------------------------------------------------------------------------------------------------------------------------------------------------------------------------------------------------------------------------------------------------------------------------------------------------------------------------------------------------------------------------------------------------------------------------------------------------------------------------------------------------------------------------------------------------------------------------------------------------------------------------------------------------------------------------------------------------------------------------------------------------------------------------------------------------------------------------------------------------------------------------------------------------------------------------------------------------------------------------------------------------------------------|
| Journal:                      | <i>BMJ Open</i>                                                                                                                                                                                                                                                                                                                                                                                                                                                                                                                                                                                                                                                                                                                                                                                                                                                                                                                                                                                                                                                                                                                                                                                                                                                                                                                                                                                                                                                                                                                                                                                                                                                                                                                                                                                                                                                                                                                                                                                                                                                                              |
| Manuscript ID                 | bmjopen-2020-043828                                                                                                                                                                                                                                                                                                                                                                                                                                                                                                                                                                                                                                                                                                                                                                                                                                                                                                                                                                                                                                                                                                                                                                                                                                                                                                                                                                                                                                                                                                                                                                                                                                                                                                                                                                                                                                                                                                                                                                                                                                                                          |
| Article Type:                 | Original research                                                                                                                                                                                                                                                                                                                                                                                                                                                                                                                                                                                                                                                                                                                                                                                                                                                                                                                                                                                                                                                                                                                                                                                                                                                                                                                                                                                                                                                                                                                                                                                                                                                                                                                                                                                                                                                                                                                                                                                                                                                                            |
| Date Submitted by the Author: | 14-Aug-2020                                                                                                                                                                                                                                                                                                                                                                                                                                                                                                                                                                                                                                                                                                                                                                                                                                                                                                                                                                                                                                                                                                                                                                                                                                                                                                                                                                                                                                                                                                                                                                                                                                                                                                                                                                                                                                                                                                                                                                                                                                                                                  |
| Complete List of Authors:     | <p>Lai, Alvina; University College London, Institute of Health Informatics<br/> Pasea, Laura; The Farr Institute of Health Informatics Research, University College ,<br/> Banerjee, Amitava; University College London, Farr Institute of Health Informatics Research<br/> Hall, Geoff; St James's University Teaching Hospital,<br/> Denaxas, S; University College London, Institute of Health Informatics<br/> Chang, Wai Hoong; University College London, Institute of Health Informatics<br/> Katsoulis, M; University College London, Institute of Health Informatics<br/> Williams, Bryan; University College London, Institute of Cardiovascular Science<br/> Pillay, Deenan; University College London, Medicine<br/> Noursadeghi, Mahdad; University College London, 4Division of Infection &amp; Immunity<br/> Linch, David; University College London<br/> Hughes, Derralyynn; Royal Free Hospital and University College Medical School, Lysosomal Storage Disorders Unit, Department of Academic Haematology<br/> Forster, Martin; University College London, Institute of Health Informatics<br/> Turnbull, Clare; Institute of Cancer Research<br/> Fitzpatrick, Natalie; UCL, Epidemiology and Public Health<br/> Boyd, Kathryn; Northern Ireland Cancer Network<br/> Foster, Graham; Barts and The London School of Medicine,<br/> Enver, Tariq; University College London, Cancer Institute<br/> Nafilyan, Vahe; Office for National Statistics<br/> Humberstone, Ben; Office for National Statistics<br/> Neal, Richard; University of Leeds, Leeds Institute of Health Sciences<br/> Cooper, Matt; UCL Partners<br/> Jones, Monica; University of Leeds<br/> Pritchard-Jones, Kathy; University College London, UCL Great Ormond Street Institute of Child Health; University College London Hospitals NHS Foundation Trust, North Central London Cancer Alliance<br/> Sullivan, Richard; Kings Health Partners<br/> Davie, Charlie; UCL Partners<br/> Lawler, Mark; Queen's University belfast, CCRCB<br/> Hemingway, Harry; UCL, Epidemiology and Public Health</p> |

1  
2  
3  
4  
5  
6  
7  
8  
9  
10  
11  
12  
13  
14  
15  
16  
17  
18  
19  
20  
21  
22  
23  
24  
25  
26  
27  
28  
29  
30  
31  
32  
33  
34  
35  
36  
37  
38  
39  
40  
41  
42  
43  
44  
45  
46  
47  
48  
49  
50  
51  
52  
53  
54  
55  
56  
57  
58  
59  
60

|           |                                                                         |
|-----------|-------------------------------------------------------------------------|
| Keywords: | COVID-19, ONCOLOGY, Health informatics < BIOTECHNOLOGY & BIOINFORMATICS |
|           |                                                                         |

SCHOLARONE™  
Manuscripts

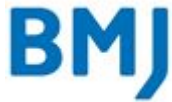

I, the Submitting Author has the right to grant and does grant on behalf of all authors of the Work (as defined in the below author licence), an exclusive licence and/or a non-exclusive licence for contributions from authors who are: i) UK Crown employees; ii) where BMJ has agreed a CC-BY licence shall apply, and/or iii) in accordance with the terms applicable for US Federal Government officers or employees acting as part of their official duties; on a worldwide, perpetual, irrevocable, royalty-free basis to BMJ Publishing Group Ltd ("BMJ") its licensees and where the relevant Journal is co-owned by BMJ to the co-owners of the Journal, to publish the Work in this journal and any other BMJ products and to exploit all rights, as set out in our [licence](#).

The Submitting Author accepts and understands that any supply made under these terms is made by BMJ to the Submitting Author unless you are acting as an employee on behalf of your employer or a postgraduate student of an affiliated institution which is paying any applicable article publishing charge ("APC") for Open Access articles. Where the Submitting Author wishes to make the Work available on an Open Access basis (and intends to pay the relevant APC), the terms of reuse of such Open Access shall be governed by a Creative Commons licence – details of these licences and which [Creative Commons](#) licence will apply to this Work are set out in our licence referred to above.

Other than as permitted in any relevant BMJ Author's Self Archiving Policies, I confirm this Work has not been accepted for publication elsewhere, is not being considered for publication elsewhere and does not duplicate material already published. I confirm all authors consent to publication of this Work and authorise the granting of this licence.

1  
2 1 **Estimated impact of the Covid-19 pandemic on cancer services and excess 1-year mortality**  
3 2 **in people with cancer and multimorbidity: near-real-time data on cancer care, cancer deaths**  
4 3 **and a population-based cohort study**  
5 4  
6 5  
7 6

8 5 Alvina G. Lai<sup>§1,2</sup>, Laura Pasea<sup>\*1,2</sup>, Amitava Banerjee<sup>\*1,2,3</sup>, Geoff Hall<sup>\*4,5,6</sup>, Spiros Denaxas<sup>1,2,7,8</sup>, Wai  
9 6 Hoong Chang<sup>1,2</sup>, Michail Katsoulis<sup>1,2</sup>, Bryan Williams<sup>7,9,10</sup>, Deenan Pillay<sup>11</sup>, Mahdad Noursadeghi<sup>11</sup>,  
10 7 David Linch<sup>7,12</sup>, Derralynn Hughes<sup>13,14</sup>, Martin D. Forster<sup>9,13</sup>, Clare Turnbull<sup>15</sup>, Natalie K. Fitzpatrick<sup>1,2</sup>,  
11 8 Kathryn Boyd<sup>16</sup>, Graham R. Foster<sup>17</sup>, Tariq Enver<sup>13</sup>, Vahe Nafilyan<sup>18</sup>, Ben Humberstone<sup>18</sup>, Richard  
12 9 D. Neal<sup>19</sup>, Matt Cooper<sup>4,5</sup>, Monica Jones<sup>4,5</sup>, Kathy Pritchard-Jones<sup>4,20,21,22</sup>, Richard Sullivan<sup>23</sup>, Charlie  
13 10 Davie<sup>4,14,20</sup>, Mark Lawler<sup>§4,24</sup>, Harry Hemingway<sup>§1,2,6</sup>  
14 11

15 12 <sup>1</sup>Institute of Health Informatics, University College London, London, UK

16 13 <sup>2</sup>Health Data Research UK, University College London, London, UK

17 14 <sup>3</sup>Barts Health NHS Trust, The Royal London Hospital, Whitechapel Rd, London, UK

18 15 <sup>4</sup>DATA-CAN, Health Data Research UK hub for cancer hosted by UCLPartners, London, UK

19 16 <sup>5</sup>Leeds Institute of Medical Research, University of Leeds, Leeds, UK

20 17 <sup>6</sup>Leeds Teaching Hospitals NHS Trust, Leeds, UK

21 18 <sup>7</sup>University College London Hospitals NIHR Biomedical Research Centre, London, UK

22 19 <sup>8</sup>The Alan Turing Institute, London, UK

23 20 <sup>9</sup>University College London Hospitals NHS Trust, London, UK

24 21 <sup>10</sup>Institute of Cardiovascular Science, University College London, London, UK

25 22 <sup>11</sup>Division of Infection and Immunity, University College London, London, UK

26 23 <sup>12</sup>Department of Hematology, University College London Cancer Institute, London, UK

27 24 <sup>13</sup>University College London Cancer Institute, London, UK

28 25 <sup>14</sup>Royal Free NHS Foundation Trust, London, UK

29 26 <sup>15</sup>Division of Genetics and Epidemiology, Institute of Cancer Research, London, UK

30 27 <sup>16</sup>Northern Ireland Cancer Network, UK

31 28 <sup>17</sup>Barts Liver Centre, Blizard Institute, Queen Mary University of London, London, UK

32 29 <sup>18</sup>Office for National Statistics, London, UK

33 30 <sup>19</sup>Leeds Institute for Health Sciences, University of Leeds, Leeds, UK

34 31 <sup>20</sup>UCLPartners Academic Health Science Partnership, London UK

35 32 <sup>21</sup>Centre for Cancer Outcomes, University College London Hospitals NHS Foundation Trust, London, UK

36 33 <sup>22</sup>UCL Great Ormond Street Institute for Child Health, University College London, London, UK

37 34 <sup>23</sup>Conflict and Health Research Group, Institute of Cancer Policy, King's College London, London, UK

38 35 <sup>24</sup>Patrick G Johnston Centre for Cancer Research, Queen's University Belfast, UK  
39 36

40 37 § Joint senior authors

41 38 \* Joint second authors  
42 39

43 40 **For correspondence:** Alvina G. Lai ([alvina.lai@ucl.ac.uk](mailto:alvina.lai@ucl.ac.uk))  
44 41  
45 42  
46 43  
47 44  
48 45  
49 46  
50 47  
51 48  
52 49  
53 50  
54 51  
55 52  
56 53  
57 54  
58 55  
59 56  
60 57

1  
2 41 **Abstract:**  
3  
4 42

5 43 **Objectives:** To estimate the impact of the covid-19 pandemic on cancer care services and overall  
6  
7 44 (direct and indirect) excess deaths in people with cancer.  
8  
9 45

10 46 **Methods:** We employed near real-time weekly data on cancer care to determine the adverse effect  
11 47 of the pandemic on cancer services. We also used these data, together with national death  
12 48 registrations until June 2020 to model deaths, in excess of background (pre-covid-19) mortality, in  
13 49 people with cancer. Background mortality risks for 24 cancers with and without covid-19-relevant  
14 50 comorbidities were obtained from population-based primary care cohort (Clinical Practice Research  
15 51 Datalink) on 3,862,012 adults in England.  
16  
17  
18  
19 52

20  
21 53 **Results:** Declines in urgent referrals (median = -70.4%) and chemotherapy attendances (median =  
22 54 -41.5%) to a nadir (lowest point) in the pandemic were observed. By 31<sup>st</sup> May, these declines have  
23 55 only partially recovered; urgent referrals (median = -44.5%) and chemotherapy attendances (median  
24 56 = -31.2%). There were short-term excess death registrations for cancer (without covid-19), with peak  
25 57 relative risk (RR) of 1.17 at week ending 3<sup>rd</sup> April. The peak RR for all-cause deaths was 2.1 from  
26 58 week ending 17<sup>th</sup> April. Based on these findings and recent literature, we modelled 40% and 80% of  
27 59 cancer patients being affected long-term by the pandemic. At 40% affected, we estimated 1-year  
28 60 total (direct and indirect) excess deaths in people with cancer as between 7,165 and 17,910, using  
29 61 RR of 1.2 and 1.5 respectively, where 78% of excess deaths occur in patients with  $\geq 1$  comorbidity.  
30  
31  
32  
33  
34  
35 62

36 63 **Conclusions:** Dramatic reductions were detected in the demand for, and supply of, cancer services  
37 64 which have not fully recovered with lockdown easing. These may contribute, over a 1-year time  
38 65 horizon, to substantial excess mortality among people with cancer and multimorbidity. It is urgent to  
39 66 understand how the recovery of general practitioner, oncology and other hospital services might best  
40 67 mitigate these long-term excess mortality risks.  
41  
42  
43  
44  
45 68  
46 69  
47  
48  
49  
50  
51  
52  
53  
54  
55  
56  
57  
58  
59  
60

1  
2  
3  
4  
5  
6  
7  
8  
9  
10  
11  
12  
13  
14  
15  
16  
17  
18  
19  
20  
21  
22  
23  
24  
25  
26  
27  
28  
29  
30  
31  
32  
33  
34  
35  
36  
37  
38  
39  
40  
41  
42  
43  
44  
45  
46  
47  
48  
49  
50  
51  
52  
53  
54  
55  
56  
57  
58  
59  
60**70 Strengths and limitations of this study**

- 71 • This is the first study that used hospital data and a predictive model to dissect and quantify the  
72 adverse impact on mortality of the pandemic on patients with cancer and multimorbidity.
- 73 • This study used the breadth of longitudinal information in primary care records from the Clinical  
74 Practice Research Datalink to generate background (pre-COVID-19) mortality estimates for  
75 patients with cancer.
- 76 • This study generated 1-year mortality estimates for 24 cancer types and evaluated the extent by  
77 which multimorbidity influences mortality risk in patients with cancer. We considered 15  
78 comorbidity clusters, which include 40 non-malignant comorbidities defined by the Public Health  
79 England as associated with severe and fatal covid-19 infection.
- 80 • This study modelled excess deaths using information on background mortality risk and plausible  
81 relative risk estimates obtained from the Office for National Statistics and other published studies.
- 82 • A limitation of this study is the use of primary care health records which may have missed cases  
83 of cancer resulting in more conservative estimations of excess deaths.

## **Introduction:**

The covid-19 pandemic may cause additional (excess) deaths due both to the direct effects of infection and the indirect effects that result from the repurposing of health services designed to address the pandemic[1]. People with cancer are at increased risk of contracting and dying from SARS-CoV-2 infection[2,3]. Optimal cancer care must balance protecting patients from SARS-CoV-2 infection, with the need for continued access to early diagnosis and delivery of optimal treatment[4,5]. Professional cancer associations internationally have recommended reducing systemic anti-cancer treatment, surgery and risk-adapted radiotherapy[6]. In June 2020, the NHS released statistics for April 2020, indicating that referrals to a consultant for urgent diagnosis of cancer had fallen by 60%[7]. Some cancer surgical procedures have been postponed and cancer screening programmes paused[8–13].

However, covid-19-induced healthcare service reconfiguration and recovery have, to date, not been informed by near real-time hospital data quantifying the extent of disruption for cancer patients resulting from this service reconfiguration, nor its impact on excess deaths in people with cancer. A previous study has employed literature-based estimates to model the impact of potential diagnostic delays in colorectal cancer during the covid-19 pandemic[14,15]. Short-term (30 days) death in people with cancer and covid-19 is importantly driven by (treatable) comorbidities such as hypertension and cardiovascular disease[16]. Public Health England (PHE) have identified patients with these and a wide range of other non-malignant conditions as at greater risk of developing severe illness from SARS-CoV-2 exposure[17,18], while multimorbidity in cancer is an increasing clinical concern[19,20]. For general practitioners and oncologists, evidence is required on the pan-cancer estimation of mortality risks according to type and number of comorbid conditions. Such evidence may inform individual decisions about physical isolation and shielding, as well as the need to ensure that patients access specialist cancer care and seek preventive care for non-malignant comorbidities.

Our objectives were: (i) to quantify changes in cancer care, reporting near-real-time weekly data (to June 2020) for urgent referral (for early diagnosis of cancer) and chemotherapy attendance (for treatment of cancer); (ii) to quantify short-term direct and indirect excess deaths using near real-time weekly death registrations from the Office for National Statistics (ONS); (iii) to estimate the number of annual direct (covid-19) and indirect excess deaths using population-based 1-year Kaplan-Meier mortality estimates for 24 cancer types and (iv) to determine the extent by which multimorbidity contributes to these excess deaths.



## **Methods:**

### ***Weekly near real-time hospital data***

To estimate the extent to which changes in cancer services during different phases of the pandemic (pre-lockdown, lockdown, post lockdown easing) have impacted on cancer care delivery, we sought weekly information for urgent cancer referrals for early diagnosis ('two-week-wait' [2WW]), an indicator of both patient demand and health service supply i.e., how well the service is ensuring that individuals with suspicious symptoms are rapidly prioritised to the diagnostic cancer pathway) and chemotherapy attendances (an indicator of supply and a proxy for possible adverse effects of the pandemic on the cancer treatment pathway). We employed the UK's Health Data Research Hub for Cancer (DATA-CAN) [21] to approach eight hospital trusts (in Leeds, London and Northern Ireland) and sought data from January 2019 to June 2020 to control for seasonal changes. Each hospital trust rapidly provided the requested data and permission to share these data in the public domain. We estimated the % change in weekly activity compared to the mean activity in 2019.

### ***Weekly near real-time death registration data***

To estimate direct (among those infected) and indirect impact of the covid-19 pandemic on deaths, we sought weekly counts of deaths in England and Wales from the Office for National Statistics (ONS), with causes classified by the ONS as covid-19 deaths, non-covid-19 deaths excluding cancer and cancer deaths.

### ***Study population: primary care population-based cohort***

To estimate pre-covid-19 incidence and mortality in individuals with cancer, we used population-based electronic health records in England from primary care data from the Clinical Practice Research Datalink (CPRD) linked to the ONS death registration. We used this primary care data source because of the extensive information on comorbidities (which may be lacking in cancer registry data). The study population was 3,862,012 adults aged  $\geq 30$  years, registered with a general practice from 1 January 1997 to 1 January 2017, with at least 1 year of follow-up data. CPRD data are representative of the English population in terms of age, sex, mortality and ethnicity[22–24], with extensive evidence of validity[25]. This study was performed as part of the CALIBER programme (<https://www.ucl.ac.uk/health-informatics/caliber>). CALIBER is an open-access research resource consisting of information, tools and phenotyping algorithms available through the CALIBER Portal (<https://caliberresearch.org/portal>)[26,27]. The study was approved by the MHRA (UK) Independent Scientific Advisory Committee (20\_074R2), under Section 251 (NHS Social Care Act 2006).

### ***Open-access definitions of disease using electronic health records***

We defined non-fatal incident cases (as alive for at least 30 days following cancer diagnosis) and prevalent cases of cancer across 24 primary cancer sites according to previously validated CALIBER

1  
2 160 electronic health record phenotypes. Incident cancers were defined as new cancer diagnoses after  
3  
4 161 the study entry into CPRD (baseline). Prevalent cancers were defined as cancer diagnoses recorded  
5 162 at any time prior to baseline. The cancers included: biliary tract, bladder, bone, brain, breast, cervix,  
6  
7 163 colorectal, Hodgkin's lymphoma, kidney, leukaemia, liver, lung, melanoma, multiple myeloma, non-  
8  
9 164 Hodgkin's lymphoma, oesophagus, oropharynx, ovary, pancreas, prostate, stomach, testis, thyroid  
10 165 and uterus[28]. Phenotype definitions of cancers and covid-19-relevant comorbidities are available  
11 166 at <https://caliberresearch.org/portal> and have previously been validated[29–32]. Phenotypes were  
12  
13 167 generated from hospital and primary care information recorded in primary care, using Read clinical  
14  
15 168 terminology (version 2).

### 16 169 17 18 170 **Comorbidities relevant to covid-19**

19 171 We examined 15 comorbidity clusters, which include 40 non-malignant comorbidities defined by PHE  
20  
21 172 as associated with severe and fatal covid-19 infection[17,18]. We separately estimated the  
22  
23 173 proportion of patients with each comorbidity at study entry (prevalent cancers), and at the date of  
24 174 the first diagnosis of incident cancer. The PHE list included chronic respiratory disease, chronic heart  
25  
26 175 disease, immunocompromised individuals, HIV, use of corticosteroids, obesity, diabetes, chronic  
27 176 kidney disease, chronic liver disease, chronic neurological disorders and splenic disorders. A full list  
28  
29 177 of the conditions we examined, and their definitions is provided in Supplementary Methods.

### 30 178 31 32 179 **Estimating incidence rates and 1-year mortality**

33 180 We estimated incidence rates per 100,000 person-years and 1-year mortality in our study population.  
34  
35 181 Estimated incidence rates for the number of new cancers by cancer site were compared with those  
36  
37 182 for the UK from the International Agency for Research on Cancer (IARC) and were found to be  
38 183 representative. We estimated baseline 1-year mortality risk following cancer diagnosis for both  
39  
40 184 incident and prevalent cancers using Kaplan-Meier analyses stratified by cancer sites and number  
41 185 of (non-cancer) comorbid conditions (0, 1, 2 and 3+). We used the most recent 5 years of data (2012-  
42  
43 186 2016) to estimate 1-year mortality.

### 44 187 45 46 188 **Estimating 1-year direct excess deaths**

47 189 Excess deaths were estimated by applying relative risks (RRs) to the background 1-year mortality  
48  
49 190 risk. Direct excess deaths (due to or with covid-19) were modelled using the range of relative risks  
50  
51 191 (1.2, 1.5 and 2.0) previously reported in studies of cancer and covid-19 deaths.[3,33] We applied  
52 192 these RRs to 10% of the population (the directly "infected"), based on recent SARS CoV-2  
53  
54 193 seroprevalence estimates in the UK[34,35] and other countries[36,37]. Although the infection rate  
55  
56 194 will change depending on the phase of the pandemic, we assumed an infection rate over 1 year in  
57 195 line with the first wave of the pandemic.  
58  
59 196  
60 197

1  
2 198  
3  
4 199  
5 200  
6  
7 201  
8 202  
9  
10 203  
11 204  
12  
13 205  
14  
15 206  
16 207  
17  
18 208  
19 209  
20  
21 210  
22  
23 211  
24 212  
25  
26 213  
27 214  
28  
29 215  
30 216  
31  
32  
33  
34  
35  
36  
37  
38  
39  
40  
41  
42  
43  
44  
45  
46  
47  
48  
49  
50  
51  
52  
53  
54  
55  
56  
57  
58  
59  
60

### ***Estimating 1-year total (direct and indirect) excess deaths***

Indirect excess deaths (due to pandemic-induced health service reconfiguration) were estimated by applying RRs for excess cancer deaths observed using ONS data, by taking the number of weekly cancer deaths from January 2020 divided by the weekly average over the last 5 years. We assumed that the effects of service change may not translate to an immediate increase in excess deaths. We have applied the RR of 1.2, 1.5 and 2 to 40% (10% infected, 30% affected) and 80% (10% infected, 70% affected) of the population and modelled excess deaths over a 12-month period to capture medium term effects. We chose this range of indirectly “affected” population based on our real-time estimates of the degree of perturbation in cancer care during the pandemic and patient reports that clinical care had been cancelled during the pandemic for 53%-70% of patients with cancer or other conditions[38].

To project the study estimates of excess deaths to the whole English population, we employed the 2018 population estimate, where the number of deaths is scaled up to a population of 35,407,313 individuals aged 30 and above[39]. All analyses were performed using R (version 3.4.3).

## Results

### ***Near real-time data on cancer care***

Evaluating data from 291,792 people with suspected cancer and 150,636 patients with cancer attending for chemotherapy from January 2019 to June 2020, we initially characterised the pre-pandemic basal level of activity (2019 average), including seasonal variations (Figure 1). Using the date of the 50<sup>th</sup> patient diagnosed with covid-19 as the starting point of the pandemic, we observed that urgent referrals fell by 70.4% (range: -68.7% to -84.3%), while chemotherapy attendances declined by 41.5% (range: -26.3% to -63.4%) (Figure 1). To highlight these adverse impacts, we provided these data to Chief Medical Officers in all 4 nations of the United Kingdom and the National Director for Cancer (England). We have also continued to provide regular updates of this intelligence to the Scientific Advisory Group for Emergencies. Since the NHS letter on 29 April 2020 re-starting cancer and other services[40], and since easing of lockdown (11 May 2020), there has been evidence of recovery for the urgent two-week-wait referrals (-55.4% to -40.0%; median = -44.5%), and chemotherapy attendances (-37.1% to 3.9%; median = -31.2%) (Figure 1).

### ***Near real-time data on cancer, covid-19 and other deaths***

We found an excess in cancer deaths with a peak in the week ending 3<sup>rd</sup> April 2020 with a relative risk (RR) of 1.17 (Figure 2B). There were 1,307 excess cancer deaths from 13<sup>th</sup> March to 15<sup>th</sup> May 2020 compared to the 5-year average based on weekly registration of deaths for England and Wales (Figure 2A). There were 41,105 covid-19 deaths up until 15<sup>th</sup> May 2020. For non-covid-19 deaths (excluding cancers), we found that the peak occurred with a RR of 1.37 on 24<sup>th</sup> April 2020. The peak RR for all-cause deaths was 2.1, from week of 17<sup>th</sup> April 2020.

### ***Estimations on direct excess deaths by cancer site over 1-year***

We estimated direct excess covid-19 deaths based on a SARS CoV-2 infection rate of 10% and background 1-year mortality risks (Figure 3A). For both incident and prevalent cancers combined, we estimated 1,790, 4,479 and 8,957 direct excess deaths at RR of 1.2, 1.5 and 2.0 respectively (Figure 3B). Figures S2 and S3 show the separate direct excess death estimates for incident and prevalent cancers. Incidence rates for 24 cancer types were shown in Figure S1.

### ***Estimations of total (direct and indirect) excess deaths by cancer site over a 1-year***

When applying RRs of 1.2 or 1.5 to 40% (10% infected, 30% affected) of the population of people with cancer (both incident and prevalent cancers), we estimated 7,165 and 17,910 total excess deaths respectively (Figure 3B). When applying these RRs to 80% (10% infected, 70% affected) of the population of people with cancer, we estimated 14,326 and 35,817 total excess deaths respectively (Figure 3B). Figures S2 and S3 show the separate total excess death estimates for incident and prevalent cancers.

1

2 255

3

4 256 **Comorbidities relevant to covid-19 risk: prevalence and association with 1-year mortality**

5 257

6 258 Comorbidities were common in people with incident cancer: hypertension (83,313 [41.9%]),  
7 cardiovascular disease (55,742 [28.0%]), chronic kidney disease (31,935 [16.0%]), obesity (19,589

8 259

9 [9.8%]), type 2 diabetes (18,957 [9.5%]) and COPD (18,373 [9.2%]) (Figure S4). Similar patterns  
10 260 were seen in prevalent cancers (Figure S5). Multimorbidity ( $\geq 1$  comorbidity) was associated with a

11 261

12 higher 1-year mortality (Figure S6 for incident cancers; Figure S7 for prevalent cancers). For  
13 26214 example, for incident colorectal cancer, 1-year mortality for 0, 1, 2 and 3+ comorbidities, was 13.8%,  
15 263 17.3%, 23.6% and 30.2% respectively (Figure S6).

16 264

17

18 265 **Estimations of total (direct and indirect) excess deaths by cancer site and number of**  
19 266 **comorbidities over a 1-year period**

20

21 267 To ascertain the influence of multimorbidity on total excess deaths, we provide estimates based on  
22 268 40% (10% infected, 30% affected). For both incident and prevalent cancers, 78% of the predicted

23 269

24 excess deaths occur in people with 1+ comorbidity. For example, at RR of 1.2, there are 5,622  
25 27026 excess deaths in those with 1+comorbidity compared to 1,567 in those with no comorbidities (total  
27 27128 7,189) (Figure 4). Even though the size of patient group in 0, 1, 2 and 3+ comorbidities declines  
29 272 (49.8%, 24.7%, 15.0% and 10.6% respectively) the absolute numbers of excess deaths in each

30 273

31 comorbidity group are similar, suggesting that patients with comorbidities contribute to a large  
32 27433 proportion of excess deaths compared to those without non-cancer comorbidities. For example, at  
34 27535 RR of 1.5, the numbers of total excess deaths for both incident and prevalent cancers were 3,922,  
36 27637 4,993, 4,526 and 4,542 in individuals with 0, 1, 2 and 3+ non-cancer comorbidities respectively  
38 277 (Figure 4). The findings for incident and prevalent cases are presented separately in Figure S8 and

39 278

40 279 Figure S9.

41

42 280 We share the underlying study estimates from this paper (online data supplement) and provide an  
43 281

44 open-access tool for researchers to interact with the model

45 282

46 283 ([https://pasea.shinyapps.io/cancer\\_covid\\_app/](https://pasea.shinyapps.io/cancer_covid_app/)).

47

48 284

49

50

51

52

53

54

55

56

57

58

59

60

1  
2 285 **Discussion:**

3 286  
4  
5 287 ***Statement of principal findings***

6  
7 288 To our knowledge, this is the first study with near real-time evidence of covid-19's negative impact  
8 289 on cancer services at different phases of the pandemic, its potential to lead to significant excess  
9  
10 290 deaths in people with cancer and the substantial role that comorbidities may play in these excess  
11 291 deaths.

12  
13 292  
14  
15 293 ***Changes in cancer care at different phases of pandemic:*** We delineate both the nadir and the  
16 294 incomplete recovery of UK cancer services that have resulted from the covid-19 pandemic. We  
17  
18 295 observed profound declines in urgent two-week wait (2WW) referrals for early cancer diagnosis,  
19 296 which have not returned to pre-covid-19 levels. These may reflect patients' deciding not to seek care  
20  
21 297 due to the perceived risk of infection, but may also be in part due to difficulty in securing appointments  
22  
23 298 due to reprioritised health systems[19]. An unintended consequence of this reprioritisation may be  
24 299 excess deaths due to delayed diagnoses, increased emergency presentations, more advanced  
25  
26 300 stage at presentation, and changes in care pathways that adversely affect outcomes. We also  
27 301 observed large declines in chemotherapy attendance, presumably reflecting capacity/resources  
28  
29 302 being redirected to care for infected patients (e.g., to intensive care) and the desire of clinicians and  
30  
31 303 patients to minimise the risks of covid-19 for susceptible cancer patients [10].

32 304  
33  
34 305 ***Direct (covid-19) excess deaths:*** It is important to note that our model estimates deaths additional to  
35 306 those that would be expected (without covid-19) in people with cancer. At a RR of 2, we estimate  
36  
37 307 about 9,000 direct covid-19 excess deaths in 1 year in people with cancer but acknowledge there is  
38  
39 308 uncertainty in this estimate. There is increasing concern that those discharged from hospital with  
40 309 covid-19 may have long term, (including fatal) sequelae.

41  
42 310  
43 311 ***Total (direct and indirect) excess deaths:*** Based on our observations regarding the adverse effects  
44  
45 312 of cancer service reprioritization, we consider a proportion affected by the pandemic of 40%  
46 313 plausible, if perhaps somewhat conservative. But, given that adverse effects could be more profound  
47  
48 314 (our 2WW referrals data, for example, would suggest this), we present excess deaths for a range of  
49  
50 315 both 40% and 80%. Adding credibility to our estimates, in a survey in April 2020 of 17,000 UK adults,  
51 316 56% of cancer patients reported that the NHS had cancelled their treatment[38] Overall, we  
52  
53 317 conservatively estimate, at RR of 1.5, that 17,910 total excess deaths for 1 year will occur in patients  
54 318 with cancer, but this could rise to 35,817. We note the degree of uncertainty in the observed RR at  
55  
56 319 different points in the pandemic. Patients affected by changes in cancer services in March–June  
57  
58 320 2020 may not necessarily directly contribute to an increase in excess indirect deaths in these four  
59 321 months, as the effects on health and mortality outcomes are more likely to occur in a longer time  
60  
322 frame.

1  
2 323  
3  
4 324 ***Importance of multimorbidity:*** We demonstrate that the majority (78%) of excess deaths in people  
5 325 with cancer during the covid-19 pandemic occur in people with at least 1 comorbidity. While many  
6  
7 326 of these comorbidities are treatable, services for these conditions have also been affected by the  
8  
9 327 pandemic. For example, 65% of patients with hypertension and 70% of patients with diabetes  
10 328 reported that the NHS had recently cancelled their care, as captured in the same April 2020 survey  
11 329 noted above[38]. Importantly, the pandemic prompts new questions about which cancer patients are  
12  
13 330 most vulnerable and how best to mitigate an individual's personal risk.

14  
15 331

### 16 332 ***Strengths of this study***

17  
18 333 There are three major strengths of this study. First, the acquisition and deployment of near real-time  
19 334 data to signal the significant adverse impact of the covid-19 pandemic on cancer services and how  
20  
21 335 this has profound implications for cancer diagnostic and treatment pathways. These data were also  
22  
23 336 used to inform and enhance our existing model that estimates excess mortality due to the pandemic.  
24 337 Second, we provide a pan-cancer comorbidity atlas using a population-based 3.8million primary care  
25  
26 338 cohort to underpin estimates of the additional adverse effect of multimorbidity in cancer patients;  
27 339 cancer registry data tend to lack this more comprehensive information. Third, we provide separate  
28  
29 340 estimates of excess deaths for prevalent cancers and incident (newly diagnosed) cancers, because  
30 341 these represent different patterns of risk, treatment priorities, and roles of general practitioner and  
31  
32 342 oncologist.

33  
34 343

### 35 344 ***Weaknesses of this study***

36  
37 345 Our model has important limitations. First, there is a lack in the literature of studies on clinical cohorts  
38 346 of cancer patients investigating all-cause mortality rates in those with and without infection; such  
39  
40 347 studies are needed in order to obtain better estimates of the direct effects of the pandemic. Second,  
41 348 the primary care health records we used may have missed some cases of cancer and thus  
42  
43 349 underestimated incidence[41]. If so, our estimates of excess deaths may be conservative. The NHS  
44  
45 350 has national linked hospital admissions and cancer registration data with information on stage and  
46 351 details of surgical, chemotherapeutic and radiotherapy treatment of cancer. However, information  
47  
48 352 governance for such data can take months to secure, making data-enabled research and time-  
49 353 sensitive responsive service improvement difficult. Third, we did not have access to data on children.  
50  
51 354 Fourth, we only have access to empirical cancer service change data from eight hospitals in the UK.  
52 355 Whilst the data may be a representative sample of the UK population, and patterns of decline in  
53  
54 356 service change is corroborated in another study[42], more widespread access to other trusts may  
55  
56 357 be beneficial to ascertain national and regional effects.

57 358

### 58 59 359 ***Implications for clinicians and policymakers***

60

1  
2 360 Our study may inform decision-making at three levels. First, from a healthcare policy and healthcare  
3 361 implementation perspective, it is clear that the NHS cannot simply be ‘switched on’ again at full  
4 362 capacity for hospital or primary care services as there will be a significant backlog of untreated  
5 363 patients, with waiting lists predicted to expand to 10 million patients. Data published on June 13<sup>th</sup>  
6 364 2020 indicate ~100,000 “missing” cancer referrals in April 2020 alone[7]. More granular weekly  
7 365 intelligence from the centres contributing data to this study suggests that this negative impact will  
8 366 continue for at least six to nine months, placing many more patients at risk.  
9  
10  
11  
12

13 367  
14  
15 368 Second, there are currently no accessible national systems available for near real-time data on care  
16 369 and outcomes of cancer patients. Our study suggests that we should expand our near real-time data  
17 370 approach across the UK to collect actionable information on (i) death certification – in particular  
18 371 distinguishing the contribution of cancer, comorbid conditions and covid-19 to death; (ii) cancer  
19 372 health services activity data, to monitor how changes at each phase of the pandemic (including  
20 373 clearing backlogs for under-referral, under-diagnosis and under-treatment) might influence future  
21 374 health outcomes and (iii) treatment services data for non-malignant comorbidities of cancer patients,  
22 375 such as cardiovascular disease, diabetes and hypertension.  
23  
24  
25  
26  
27  
28

29 377 Third, with knowledge of mortality risk based on type of cancer, age and comorbidities that we  
30 378 provide in an online format ([https://pasea.shinyapps.io/cancer\\_covid\\_app/](https://pasea.shinyapps.io/cancer_covid_app/)), supplemented with local  
31 379 knowledge of health service resilience, we propose that weekly indicators and warnings for  
32 380 vulnerable cancer patients with multimorbidity could be provided. Using this intelligence, treatment  
33 381 prioritization as we resume cancer services could be enhanced by patient-specific risk/benefit  
34 382 assessments which include multimorbidity, particularly in situations where treatment provision  
35 383 outweighs non-treatment/safety issues related to covid-19[19].  
36  
37  
38  
39  
40  
41

#### 42 385 ***Unanswered questions and future research***

43 386 There are important areas for further research. First, there is a need for long-term (1 to 5 years)  
44 387 monitoring of the extent to which cancer patients experience excess mortality due to the pandemic.  
45 388 We chose a 1-year time horizon, because the adverse consequences on health are likely to extend  
46 389 beyond the initial wave of the pandemic. But its impact on excess mortality in patients with cancer,  
47 390 particularly those whose diagnosis/treatment is delayed, may take years to understand. The specific  
48 391 impact of paused cancer screening, particularly for breast and colorectal cancer may be profound.  
49 392 The social and psychological consequences of physical distancing on mortality may also be  
50 393 particularly important in cancer[43,44], while international studies across 75 countries signpost how  
51 394 unemployment negatively impacts mortality in cancer patients[45]. Hence, the socio-economic  
52 395 effects of the current pandemic are likely to last for a considerable period beyond one year[46]. As  
53 396 new empirical data become available on health service, social/psychological and economic changes,  
54  
55  
56  
57  
58  
59  
60



1  
2 397 our model can better specify the proportion and type of cancer patients thus affected and look to  
3  
4 398 develop appropriate mitigation strategies.

5 399

6  
7 400 **Conclusion**

8 401 We mobilised usually inaccessible near real-time hospital data to quantify the immediate adverse  
9  
10 402 impacts of the covid-19 pandemic on cancer services, on people who may demonstrate symptoms  
11 403 of cancer and on patients who are being treated for cancer. The marked reductions observed in the  
12  
13 404 demand for, and supply of, cancer services have only partially recovered with lockdown easing.  
14  
15 405 Such perturbations in cancer care may contribute, over a 1-year time horizon, to substantial excess  
16 406 mortality among people with cancer and multimorbidity. There is an urgent need to better understand  
17  
18 407 and mitigate these excess mortality risks, some of which may be revealed only over the longer term.

19 408

20

21 409

22 410

23

24

25

26

27

28

29

30

31

32

33

34

35

36

37

38

39

40

41

42

43

44

45

46

47

48

49

50

51

52

53

54

55

56

57

58

59

60

1  
2 411 **Contributorship statement:**

3 412 Research question: AGL, HH

4 413 Funding: AGL, AB, ML, HH, DATA-CAN

5 414 Study design and analysis plan: AGL, LP, AB, MK, WHC, HH

6 415 Preparation of data, including electronic health record phenotyping in the CALIBER portal: AGL, LP,  
7 416 SD

8 417 Provision of weekly hospital data: GH, KPJ, MDF, DH, ML, KB, CD

9 418 Statistical analysis: AGL, LP, WHC, MK

10 419 Drafting initial versions of manuscript: AGL, ML, HH

11 420 Drafting final versions of manuscript: AGL, GH, CD, ML, HH,

12 421 Critical review of early and final versions of manuscript: All authors

13 422 The corresponding author attests that all listed authors meet authorship criteria and that no others  
14 423 meeting the criteria have been omitted.

15 424  
16 425 **Declaration of interests:**

17 426 ML has received honoraria from Pfizer, EMD Serono and Roche for presentations unrelated to this  
18 427 research. ML has received an unrestricted educational grant from Pfizer for research unrelated to  
19 428 the research presented in this paper. AB has received research funding from AstraZeneca. MDF has  
20 429 received research funding from AstraZeneca, Boehringer Ingelheim, Merck and MSD and honoraria  
21 430 from Achilles, AstraZeneca, Bayer, Boehringer Ingelheim, Bristol-Meyers Squibb, Celgene,  
22 431 Guardant Health, Merck, MSD, Nanobiotix, Novartis, Pharmamar, Roche and Takeda for advisory  
23 432 roles or presentations unrelated to this research. GRF receives funding from companies that  
24 433 manufacture drugs for hepatitis C virus (AbbVie, Gilead, MSD) and consult for GSK, Arbutus and  
25 434 Shionogi in areas unrelated to this research.

26 435  
27 436 **Acknowledgments:**

28 437 We thank Tony Hagger, Shiva Thapa, Mohammed Emran, Cara Anderson, Louise Herron, Joy  
29 438 Beaumont, Maurice Loughrey, Philip Melling and Lee Cogger for their help on collating data on  
30 439 urgent cancer referrals and chemotherapy attendances. We thank the HDR UK DATA-CAN Patient  
31 440 and Public Involvement and Engagement panel for critical feedback on the manuscript. We thank  
32 441 Charles Swanton for his valuable comments on the manuscript. This study is based in part on data  
33 442 from the Clinical Practice Research Datalink obtained under licence from the UK Medicines and  
34 443 Healthcare products Regulatory Agency. The data is provided by patients and collected by the NHS  
35 444 as part of their care and support. Mortality data are from the Office for National Statistics (ONS).

36 445  
37 446 **Funding statement:**

38 447 We acknowledge Health Data Research UK (HDR UK) support for the HDR UK substantive sites  
39 448 involved in this research (HDR London, HDR Wales and Northern Ireland) and DATA-CAN. DATA-

1  
2 449 CAN is part of the Digital Innovation Hub Programme, delivered by HDR UK and funded by UK  
3 450 Research and Innovation through the government's Industrial Strategy Challenge Fund (ISCF). AGL  
4 451 is supported by funding from the Wellcome Trust, National Institute for Health Research (NIHR)  
5 452 University College London Hospitals, NIHR Great Ormond Street Hospital Biomedical Research  
6 453 Centres and the Health Data Research UK Better Care Catalyst Award. AB is supported by research  
7 454 funding from NIHR, British Medical Association, Astra-Zeneca and UK Research and Innovation.  
8 455 KPJ is supported by the NIHR Great Ormond Street Hospital Biomedical Research Centre. CD and  
9 456 KPJ is funded by UCLPartners. HH is an NIHR Senior Investigator and is funded by the NIHR  
10 457 University College London Hospitals Biomedical Research Centre, supported by Health Data  
11 458 Research UK (grant No. LOND1), which is funded by the UK Medical Research Council, Engineering  
12 459 and Physical Sciences Research Council, Economic and Social Research Council, Department of  
13 460 Health and Social Care (England), Chief Scientist Office of the Scottish Government Health and  
14 461 Social Care Directorates, Health and Social Care Research and Development Division (Welsh  
15 462 Government), Public Health Agency (Northern Ireland), British Heart Foundation, Wellcome Trust,  
16 463 The BigData@Heart Consortium, funded by the Innovative Medicines Initiative-2 Joint Undertaking  
17 464 under grant agreement No. 116074.  
18  
19  
20  
21  
22  
23  
24  
25  
26  
27  
28

29 466 **Data sharing statement:**

30 467 Data used in this study was accessed through the Clinical Practice Research Datalink that is subject  
31 468 to protocol approval by an Independent Scientific Advisory Committee and cannot directly be shared.  
32 469 All results are reported in the manuscript and no additional data is available.  
33  
34  
35  
36

37 471 **Patient and public involvement statement:**

38 472 The Health Data Research UK hub for cancer (DATA-CAN) patient and public advisory panel were  
39 473 consulted during the writing of this manuscript.  
40  
41  
42

43 475 **Ethics approval:**

44 476 The study was approved by the MHRA (UK) Independent Scientific Advisory Committee  
45 477 (20\_074R2), under Section 251 (NHS Social Care Act 2006).  
46  
47  
48  
49  
50  
51  
52  
53  
54  
55  
56  
57  
58  
59  
60

1  
2 479 **References:**

- 3 480 1 Banerjee A, Pasea L, Harris S, *et al.* Estimating excess 1-year mortality associated with the  
4 481 COVID-19 pandemic according to underlying conditions and age: a population-based cohort  
5 482 study. *Lancet* 2020;**395**:1715–25. doi:10.1016/S0140-6736(20)30854-0  
6  
7 483 2 Kuderer NM, Choueiri TK, Shah DP, *et al.* Clinical impact of COVID-19 on patients with  
8 484 cancer (CCC19): a cohort study. *Lancet* 2020.  
9  
10 485 3 Williamson E, Walker AJ, Bhaskaran KJ, *et al.* OpenSAFELY: factors associated with  
11 486 COVID-19-related hospital death in the linked electronic health records of 17 million adult  
12 487 NHS patients. *MedRxiv* 2020.  
13  
14 488 4 Rosenbaum L. The Untold Toll — The Pandemic’s Effects on Patients without Covid-19. *N*  
15 489 *Engl J Med* doi:10.1056/NEJMms2009984  
16  
17 490 5 Vrdoljak E, Sullivan R, Lawler M. Cancer and COVID-19; how do we manage cancer  
18 491 optimally through a public health crisis? *Eur J Cancer* 2020;**132**:P98-99.  
19  
20 492 6 Thomson DJ, Palma D, Guckenberger M, *et al.* Practice recommendations for risk-adapted  
21 493 head and neck cancer radiotherapy during the COVID-19 pandemic: an ASTRO-ESTRO  
22 494 consensus statement. *Int J Radiat Oncol Biol Phys* 2020.  
23  
24 495 7 NHS England. Provider-based Cancer Waiting Times for April 2019. Accessed 17 June  
25 496 2020. [https://www.england.nhs.uk/statistics/statistical-work-areas/cancer-waiting-](https://www.england.nhs.uk/statistics/statistical-work-areas/cancer-waiting-times/monthly-prov-cwt/2019-20-monthly-provider-cancer-waiting-times-statistics/provider-based-cancer-waiting-times-for-april-2019-provisional/)  
26 497 [times/monthly-prov-cwt/2019-20-monthly-provider-cancer-waiting-times-statistics/provider-](https://www.england.nhs.uk/statistics/statistical-work-areas/cancer-waiting-times/monthly-prov-cwt/2019-20-monthly-provider-cancer-waiting-times-statistics/provider-based-cancer-waiting-times-for-april-2019-provisional/)  
27 498 [based-cancer-waiting-times-for-april-2019-provisional/](https://www.england.nhs.uk/statistics/statistical-work-areas/cancer-waiting-times/monthly-prov-cwt/2019-20-monthly-provider-cancer-waiting-times-statistics/provider-based-cancer-waiting-times-for-april-2019-provisional/)  
28  
29 499 8 Burki TK. Cancer guidelines during the COVID-19 pandemic. *Lancet Oncol* 2020.  
30  
31 500 9 British Society of Gastroenterology. Endoscopy activity and COVID-19: BSG and JAG  
32 501 guidance. Accessed 19 April 2020. [https://www.bsg.org.uk/covid-19-advice/endoscopy-](https://www.bsg.org.uk/covid-19-advice/endoscopy-activity-and-covid-19-bsg-and-jag-guidance/)  
33 502 [activity-and-covid-19-bsg-and-jag-guidance/](https://www.bsg.org.uk/covid-19-advice/endoscopy-activity-and-covid-19-bsg-and-jag-guidance/)  
34  
35 503 10 National Institute for Health and Care Excellence. COVID-19 rapid guideline: delivery of  
36 504 systemic anticancer treatments. Accessed 19 April 2020.  
37 505 [https://www.nice.org.uk/guidance/ng161/chapter/6-Prioritising-systemic-anticancer-](https://www.nice.org.uk/guidance/ng161/chapter/6-Prioritising-systemic-anticancer-treatments)  
38 506 [treatments](https://www.nice.org.uk/guidance/ng161/chapter/6-Prioritising-systemic-anticancer-treatments)  
39  
40 507 11 American Cancer Society. Survey: COVID-19 Affecting Patients’ Access to Cancer Care.  
41 508 Accessed 19 April 2020. [https://www.fightcancer.org/releases/survey-covid-19-affecting-](https://www.fightcancer.org/releases/survey-covid-19-affecting-patients-access-cancer-care-5)  
42 509 [patients’-access-cancer-care-5](https://www.fightcancer.org/releases/survey-covid-19-affecting-patients-access-cancer-care-5)  
43  
44 510 12 American College of Surgeons. COVID-19 Guidelines for Triage of Breast Cancer Patients.  
45 511 Accessed 19 April 2020. [https://www.facs.org/covid-19/clinical-guidance/elective-](https://www.facs.org/covid-19/clinical-guidance/elective-case/breast-cancer)  
46 512 [case/breast-cancer](https://www.facs.org/covid-19/clinical-guidance/elective-case/breast-cancer)  
47  
48 513 13 American Society for Radiation Oncology. COVID-19 Coding Guidance. Accessed 19 April  
49 514 2020. [https://www.astro.org/Daily-Practice/Coding/Coding-Guidance/](https://www.astro.org/Daily-Practice/Coding/Coding-Guidance/Coding-Updates/COVID-19-Coding-Guidance)  
50 515 [Coding-](https://www.astro.org/Daily-Practice/Coding/Coding-Guidance/Coding-Updates/COVID-19-Coding-Guidance)  
51 516 [Updates/COVID-19-Coding-Guidance](https://www.astro.org/Daily-Practice/Coding/Coding-Guidance/Coding-Updates/COVID-19-Coding-Guidance)

- 1  
2 517 surgery of the COVID-19 pandemic. *Ann Oncol* 2020.
- 3  
4 518 15 Sud A, Jones ME, Broggio J, *et al*. Quantifying and mitigating the impact of the COVID-19  
5 519 pandemic on outcomes in colorectal cancer. 2020.
- 6  
7 520 16 Lee LYW, Cazier JB, Starkey T, *et al*. COVID-19 mortality in patients with cancer on  
8 521 chemotherapy or other anticancer treatments: a prospective cohort study. *Lancet* 2020.
- 9  
10 522 17 Public Health England. Guidance on shielding and protecting people defined on medical  
11 523 grounds as extremely vulnerable from COVID-19. Accessed 19 April 2020.  
12  
13 524 [https://www.gov.uk/government/publications/guidance-on-shielding-and-protecting-](https://www.gov.uk/government/publications/guidance-on-shielding-and-protecting-extremely-vulnerable-persons-from-covid-19/guidance-on-shielding-and-protecting-extremely-vulnerable-persons-from-covid-19)  
14  
15 525 [extremely-vulnerable-persons-from-covid-19/guidance-on-shielding-and-protecting-](https://www.gov.uk/government/publications/guidance-on-shielding-and-protecting-extremely-vulnerable-persons-from-covid-19/guidance-on-shielding-and-protecting-extremely-vulnerable-persons-from-covid-19)  
16 526 [extremely-vulnerable-persons-from-covid-19](https://www.gov.uk/government/publications/guidance-on-shielding-and-protecting-extremely-vulnerable-persons-from-covid-19/guidance-on-shielding-and-protecting-extremely-vulnerable-persons-from-covid-19)
- 17  
18 527 18 Public Health England. Guidance on social distancing for everyone in the UK. Accessed 19  
19 528 April 2020. [https://www.gov.uk/government/publications/covid-19-guidance-on-social-](https://www.gov.uk/government/publications/covid-19-guidance-on-social-distancing-and-for-vulnerable-people/guidance-on-social-distancing-for-everyone-in-the-uk-and-protecting-older-people-and-vulnerable-adults)  
20  
21 529 [distancing-and-for-vulnerable-people/guidance-on-social-distancing-for-everyone-in-the-uk-](https://www.gov.uk/government/publications/covid-19-guidance-on-social-distancing-and-for-vulnerable-people/guidance-on-social-distancing-for-everyone-in-the-uk-and-protecting-older-people-and-vulnerable-adults)  
22 530 [and-protecting-older-people-and-vulnerable-adults](https://www.gov.uk/government/publications/covid-19-guidance-on-social-distancing-and-for-vulnerable-people/guidance-on-social-distancing-for-everyone-in-the-uk-and-protecting-older-people-and-vulnerable-adults)
- 23  
24 531 19 Hanna TP, Evans GA, Booth CM. Cancer, COVID-19 and the precautionary principle:  
25 532 prioritizing treatment during a global pandemic. *Nat Rev Clin Oncol* 2020;:1–3.
- 26  
27 533 20 Renzi C, Kaushal A, Emery J, *et al*. Comorbid chronic diseases and cancer diagnosis:  
28 534 disease-specific effects and underlying mechanisms. *Nat Rev Clin Oncol* Published Online  
29 535 First: 2019. doi:10.1038/s41571-019-0249-6
- 30  
31 536 21 Health Data Research UK. DATA-CAN - The Health Data Research Hub for Cancer.  
32 537 Accessed 20 April 2020. <https://www.hdr.uk/infrastructure/the-hubs/data-can/>
- 33  
34 538 22 George J, Mathur R, Shah AD, *et al*. Ethnicity and the first diagnosis of a wide range of  
35 539 cardiovascular diseases: Associations in a linked electronic health record cohort of 1 million  
36 540 patients. *PLoS One* 2017;**12**:1–17. doi:10.1371/journal.pone.0178945
- 37  
38 541 23 Bhaskaran K, Forbes HJ, Douglas I, *et al*. Representativeness and optimal use of body  
39 542 mass index (BMI) in the UK Clinical Practice Research Datalink (CPRD). *BMJ Open*  
40 543 2013;**3**:e003389.
- 41  
42 544 24 Mathur R, Bhaskaran K, Chaturvedi N, *et al*. Completeness and usability of ethnicity data in  
43 545 UK-based primary care and hospital databases. *J Public Health (Bangkok)* 2014;**36**:684–92.
- 44  
45 546 25 Herrett E, Thomas SL, Schoonen WM, *et al*. Validation and validity of diagnoses in the  
46 547 General Practice Research Database: a systematic review. *Br J Clin Pharmacol* 2010;**69**:4–  
47 548 14.
- 48  
49 549 26 Denaxas S, Gonzalez-Izquierdo A, Direk K, *et al*. UK phenomics platform for developing and  
50 550 validating electronic health record phenotypes: CALIBER. *J Am Med Informatics Assoc*  
51 551 2019.
- 52  
53 552 27 Denaxas SC, George J, Herrett E, *et al*. Data resource profile: cardiovascular disease  
54 553 research using linked bespoke studies and electronic health records (CALIBER). *Int J*  
55 554 *Epidemiol* 2012;**41**:1625–38.

- 1  
2 555 28 Kuan V, Denaxas S, Gonzalez-Izquierdo A, *et al.* A chronological map of 308 physical and  
3 556 mental health conditions from 4 million individuals in the English National Health Service.  
4 557 *Lancet Digit Heal* 2019;**1**:e63–77. doi:10.1016/S2589-7500(19)30012-3
- 5 558 29 Shah AD, Langenberg C, Rapsomaniki E, *et al.* Type 2 diabetes and incidence of  
6 559 cardiovascular diseases: A cohort study in 1.9 million people. *Lancet Diabetes Endocrinol*  
7 560 2015;**3**:105–13. doi:10.1016/S2213-8587(14)70219-0
- 8 561 30 Rapsomaniki E, Timmis A, George J, *et al.* Blood pressure and incidence of twelve  
9 562 cardiovascular diseases: Lifetime risks, healthy life-years lost, and age-specific associations  
10 563 in 1.25 million people. *Lancet* 2014;**383**:1899–911. doi:10.1016/S0140-6736(14)60685-1
- 11 564 31 Pikoula M, Quint JK, Nissen F, *et al.* Identifying clinically important COPD sub-types using  
12 565 data-driven approaches in primary care population based electronic health records. *BMC*  
13 566 *Med Inform Decis Mak* 2019;**19**:86.
- 14 567 32 Pujades-Rodriguez M, Duyx B, Thomas SL, *et al.* Rheumatoid arthritis and incidence of  
15 568 twelve initial presentations of cardiovascular disease: a population record-linkage cohort  
16 569 study in England. *PLoS One* 2016;**11**.
- 17 570 33 Dai M, Liu D, Liu M, *et al.* Patients with cancer appear more vulnerable to SARS-COV-2: a  
18 571 multi-center study during the COVID-19 outbreak. *Cancer Discov* Published Online First:  
19 572 2020. doi:10.1158/2159-8290.CD-20-0422
- 20 573 34 Office for National Statistics. Coronavirus (COVID-19) Infection Survey.  
21 574 [https://www.ons.gov.uk/peoplepopulationandcommunity/healthandsocialcare/conditionsandd](https://www.ons.gov.uk/peoplepopulationandcommunity/healthandsocialcare/conditionsanddiseases/datasets/coronaviruscovid19infectionsurveydata)  
22 575 [iseases/datasets/coronaviruscovid19infectionsurveydata](https://www.ons.gov.uk/peoplepopulationandcommunity/healthandsocialcare/conditionsanddiseases/datasets/coronaviruscovid19infectionsurveydata). Accessed 3 September 2020.
- 23 576 35 GOV UK. Sero-surveillance of COVID-19.  
24 577 [https://www.gov.uk/government/publications/national-covid-19-surveillance-reports/sero-](https://www.gov.uk/government/publications/national-covid-19-surveillance-reports/sero-surveillance-of-covid-19)  
25 578 [surveillance-of-covid-19](https://www.gov.uk/government/publications/national-covid-19-surveillance-reports/sero-surveillance-of-covid-19). Accessed 3 September 2020.
- 26 579 36 Valenti L, Bergna A, Pelusi S, *et al.* SARS-CoV-2 seroprevalence trends in healthy blood  
27 580 donors during the COVID-19 Milan outbreak. *medRxiv* 2020.
- 28 581 37 Salje H, Kiem CT, Lefrancq N, *et al.* Estimating the burden of SARS-CoV-2 in France.  
29 582 *Science (80- )* 2020.
- 30 583 38 Understanding Society COVID-19 survey. Accessed 17 June 2020.  
31 584 [https://www.understandingsociety.ac.uk/sites/default/files/downloads/general/ukhls\\_briefing](https://www.understandingsociety.ac.uk/sites/default/files/downloads/general/ukhls_briefing_note_covid_health_final.pdf)  
32 585 [note\\_covid\\_health\\_final.pdf](https://www.understandingsociety.ac.uk/sites/default/files/downloads/general/ukhls_briefing_note_covid_health_final.pdf).
- 33 586 39 Office for National Statistics. Estimates of the population for the UK, England and Wales,  
34 587 Scotland and Northern Ireland. Accessed 23 April 2020.  
35 588 [https://www.ons.gov.uk/peoplepopulationandcommunity/populationandmigration/populationest](https://www.ons.gov.uk/peoplepopulationandcommunity/populationandmigration/populationestimates/datasets/populationestimatesforukenglandandwalesscotlandandnorthernireland)  
36 589 [imates/datasets/populationestimatesforukenglandandwalesscotlandandnorthernireland](https://www.ons.gov.uk/peoplepopulationandcommunity/populationandmigration/populationestimates/datasets/populationestimatesforukenglandandwalesscotlandandnorthernireland)
- 37 590 40 NHS England. NHS warning to seek help for cancer symptoms, as half of public report  
38 591 concerns with getting checked. <https://tinyurl.com/y6owtj4u>.
- 39 592 41 Margulis A V, Fortuny J, Kaye JA, *et al.* Validation of cancer cases using primary care,

- 1  
2 593 cancer registry, and hospitalization data in the United Kingdom. *Epidemiology* 2018;**29**:308.  
3  
4 594 42 Banerjee A, Chen S, Pasea L, *et al*. Excess deaths in people with cardiovascular diseases  
5 595 during the COVID-19 pandemic. *medRxiv* Published Online First: 2020.  
6  
7 596 doi:10.1101/2020.06.10.20127175  
8 597 43 Kroenke CH, Kubzansky LD, Schernhammer ES, *et al*. Social networks, social support, and  
9 survival after breast cancer diagnosis. *J Clin Oncol* 2006;**24**:1105–11.  
10 598  
11 599 44 Elovainio M, Hakulinen C, Pulkki-Råback L, *et al*. Contribution of risk factors to excess  
12 mortality in isolated and lonely individuals: an analysis of data from the UK Biobank cohort  
13 600 study. *Lancet Public Heal* 2017;**2**:e260--e266.  
14  
15 601  
16 602 45 Maruthappu M, Watkins J, Noor AM, *et al*. Economic downturns, universal health coverage,  
17 and cancer mortality in high-income and middle-income countries, 1990--2010: a  
18 603 longitudinal analysis. *Lancet* 2016;**388**:684–95.  
19 604  
20  
21 605 46 Longer-Run Economic Consequences of Pandemics. Accessed 1 May 2020.  
22  
23 606 <https://www.frbsf.org/economic-research/files/wp2020-09.pdf>  
24 607  
25  
26  
27  
28  
29  
30  
31  
32  
33  
34  
35  
36  
37  
38  
39  
40  
41  
42  
43  
44  
45  
46  
47  
48  
49  
50  
51  
52  
53  
54  
55  
56  
57  
58  
59  
60

1  
2 608 **Figure legends:**  
3 609

4 610 Figure 1. Weekly hospital data (January 2019 to June 2020) on changes in urgent referrals and  
5 611 chemotherapy clinic attendance from eight hospitals in the UK mapped to phases of the pandemic.  
6 612 Weekly changes from January 2020 to June 2020 were mapped to phases of the pandemic. Weekly  
7 613 values were plotted as percentage increase or decrease relative to the 2019 average. The data for  
8 614 Northern Ireland includes five Health and Social Care Trusts (HSCs) that cover all health service  
9 615 provision in Northern Ireland: Belfast HSC, Northern HSC, South Eastern HSC, Southern HSC and  
10 616 Western HSC. Vertical dotted lines indicate the Christmas Bank Holiday.  
11  
12  
13  
14  
15  
16

17 618 Figure 2. Office for National Statistics data on weekly registrations of deaths in the England and  
18 619 Wales from 3 January 2020 to 15 May 2020. (A) Upper panel indicates the number of weekly deaths.  
19 620 (B) Lower panel indicates weekly changes in relative risk estimates calculated by comparing the  
20 621 current weekly deaths to 5-year weekly averages. Dates indicate week ending on a particular date.  
21  
22  
23  
24

25 623 Figure 3. Estimated total (direct and indirect) excess deaths by cancer site over a 1-year period (A)  
26 624 1-year mortality for incident and prevalent cancers. The whiskers are 95% confidence intervals. (B)  
27 625 Total excess deaths were scaled up to the population of England aged 30+ consisting of 35 million  
28 626 individuals using England mortality estimates for both incident and prevalent cancers combined. We  
29 627 estimated direct excess deaths at a 10% infection rate. We estimated total (direct and indirect)  
30 628 excess deaths for 40% (10% infected, 30% affected) and 80% (10% infected, 70% affected) of the  
31 629 population.  
32  
33  
34  
35

36 630  
37 631 Figure 4. Total (direct and indirect) excess deaths for both incident and prevalent cancers by cancer  
38 632 site and number of comorbidities over a 1-year period. Stacked bar chart indicates the proportion of  
39 633 individuals with 0, 1, 2 and 3+ comorbidities by cancer site. We estimated total excess deaths for  
40 634 40% (10% infected, 30% affected) of the population. Total excess deaths were scaled up to the  
41 635 population of England aged 30+ consisting of 35 million individuals using England mortality estimates  
42 636 for both incident and prevalent cancers combined.  
43  
44  
45  
46

47 637  
48 638  
49 639  
50 640 **Supplementary figure legends:**  
51 641

52 642 Figure S1. Age-adjusted incidence rates for 24 primary cancers from England and the UK  
53 643 (International Agency for Research on Cancer [IARC]) For England data, cervix refers to both  
54 644 carcinoma in situ of cervix and primary malignancy of cervix. For IARC data, only cervix uteri are  
55 645 included. CRUK: Cancer Research UK.  
56  
57  
58  
59  
60



1  
2 646 Figure S2. Total excess deaths for incident cancers over a 1-year period scaled up to the population  
3 647 of England aged 30+ consisting of 35 million individuals using England mortality estimates. We  
4 648 estimated direct excess deaths at a 10% infection rate. We estimated total (direct and indirect)  
5 649 excess deaths for 40% (10% infected, 30% affected) and 80% (10% infected, 70% affected) of the  
6 650 population.  
7  
8  
9

10 651  
11 652 Figure S3. Total excess deaths for prevalent cancers over a 1-year period scaled up to the population  
12 653 of England aged 30+ consisting of 35 million individuals using England mortality estimates. We  
13 654 estimated direct excess deaths at a 10% infection rate. We estimated total (direct and indirect)  
14 655 excess deaths for 40% (10% infected, 30% affected) and 80% (10% infected, 70% affected) of the  
15 656 population.  
16  
17  
18

19 657  
20  
21 658 Figure S4. Proportion of patients with any of the 15 comorbidity clusters by cancer site for incident  
22 659 cancers (N=199,057) in a population of 3,862,012 adults in England. Age indicates mean age at  
23 660 diagnosis.  
24  
25

26 661  
27 662 Figure S5. Proportion of patients with any of the 15 comorbidity clusters by cancer site for prevalent  
28 663 cancers (N=117,978) in a population of 3,862,012 adults in England. Age indicates mean age at  
29 664 diagnosis.  
30  
31

32 665  
33 666 Figure S6. Forest plot of background (pre-COVID-19) 1-year cancer mortality for incident cases  
34 667 according to cancer site and number of underlying comorbidities in England. The whiskers are 95%  
35 668 confidence intervals.  
36  
37

38 669  
39  
40 670 Figure S7. Forest plot of background (pre-COVID-19) 1-year cancer mortality for prevalent cases  
41 671 according to cancer site and number of underlying comorbidities in England. The whiskers are 95%  
42 672 confidence intervals.  
43  
44

45 673  
46 674 Figure S8. Total (direct and indirect) excess deaths for incident cancers by cancer site and number  
47 675 of comorbidities over a 1-year period. Stacked bar chart indicates the proportion of individuals with  
48 676 0, 1, 2 and 3+ comorbidities by cancer site. We estimated total excess deaths for 40% (10% infected,  
49 677 30% affected) of the population. Total excess deaths were scaled up to the population of England  
50 678 aged 30+ consisting of 35 million individuals using England mortality estimates for incident cancers.  
51  
52

53 679  
54  
55 680 Figure S9. Total (direct and indirect) excess deaths for prevalent cancers by cancer site and number  
56 681 of comorbidities over a 1-year period. Stacked bar chart indicates the proportion of individuals with  
57 682 0, 1, 2 and 3+ comorbidities by cancer site. We estimated total excess deaths for 40% (10% infected,  
58  
59  
60

1  
2 683 30% affected) of the population. Total excess deaths were scaled up to the population of England  
3  
4 684 aged 30+ consisting of 35 million individuals using England mortality estimates for prevalent cancers.  
5 685  
6  
7  
8  
9  
10  
11  
12  
13  
14  
15  
16  
17  
18  
19  
20  
21  
22  
23  
24  
25  
26  
27  
28  
29  
30  
31  
32  
33  
34  
35  
36  
37  
38  
39  
40  
41  
42  
43  
44  
45  
46  
47  
48  
49  
50  
51  
52  
53  
54  
55  
56  
57  
58  
59  
60

For peer review only

1  
2 686 **Supplementary Methods**

3 687  
4  
5 688 ***Description on 15 comorbidity clusters relevant to COVID-19***

6  
7 689 The PHE list included chronic respiratory disease, chronic heart disease, immunocompromised  
8 690 individuals, HIV, use of corticosteroids, obesity, diabetes, chronic kidney disease, chronic liver  
9  
10 691 disease, chronic neurological disorders and splenic disorders. We have performed analyses for all  
11 692 the above conditions and have additionally considered hypertension, Crohn's disease, cystic fibrosis  
12  
13 693 and rheumatoid arthritis. Given that condition clusters such as **(i)** chronic heart disease would involve  
14  
15 694 a range of conditions, we have derived composite variables to include 15 conditions considered as  
16 695 cardiovascular disease (CVD) that included acute myocardial infarction, unstable angina, chronic  
17  
18 696 stable angina, heart failure, cardiac arrest or sudden coronary death, transient ischemic attack,  
19 697 intracerebral haemorrhage, subarachnoid haemorrhage, ischemic stroke, abdominal aortic  
20  
21 698 aneurysm, peripheral arterial disease, atrial fibrillation, congenital heart disease, hypertrophic and  
22  
23 699 dilated cardiomyopathy and valve disease (multiple, mitral and aortic)[29]. We also considered **(ii)**  
24 700 Hypertension, defined as  $\geq 140$  mmHg systolic blood pressure (or  $\geq 150$  mmHg for people aged  $\geq 60$   
25  
26 701 years without diabetes and chronic kidney disease) and/or  $\geq 90$  mmHg diastolic blood pressure[30],  
27 702 **(iii)** type 2 diabetes, **(iv)** obesity, defined as a body mass index of  $\geq 40$ kg/m<sup>2</sup>, **(v)** chronic kidney  
28  
29 703 disease (CKD), **(vi)** chronic obstructive pulmonary disease (COPD)[31], **(vii)** patients on  
30 704 immunosuppressive drugs (not cancer chemotherapy), **(viii)** patients with HIV or corticosteroid  
31  
32 705 prescription, **(ix)** chronic neurological disorders, defined as a composite of Parkinson's disease,  
33  
34 706 motor neuron disease, learning disability and cerebral palsy, **(x)** multiple sclerosis separately, **(xi)**  
35 707 splenic disorders, defined as a composite of splenomegaly, splenectomy and hyposplenism, **(xii)**  
36  
37 708 chronic liver diseases, defined as a composite of chronic viral hepatitis B or C, primary biliary  
38 709 cholangitis, liver fibrosis, liver cirrhosis and non-alcoholic fatty liver disease, **(xiii)** Crohn's disease,  
39  
40 710 **(xiv)** cystic fibrosis and **(xv)** rheumatoid arthritis[32].

41 711

42 712

43

44

45

46

47

48

49

50

51

52

53

54

55

56

57

58

59

60

Figure 1. Weekly hospital data (January 2019 to June 2020) on changes in urgent referrals and chemotherapy clinic attendance from eight hospitals in the UK mapped to phases of the pandemic. Weekly changes from January 2020 to June 2020 were mapped to phases of the pandemic. Weekly values were plotted as percentage increase or decrease relative to the 2019 average. The data for Northern Ireland includes five Health and Social Care Trusts (HSCs) that cover all health service provision in Northern Ireland: Belfast HSC, Northern HSC, South Eastern HSC, Southern HSC and Western HSC. Vertical dotted lines indicate the Christmas Bank Holiday.

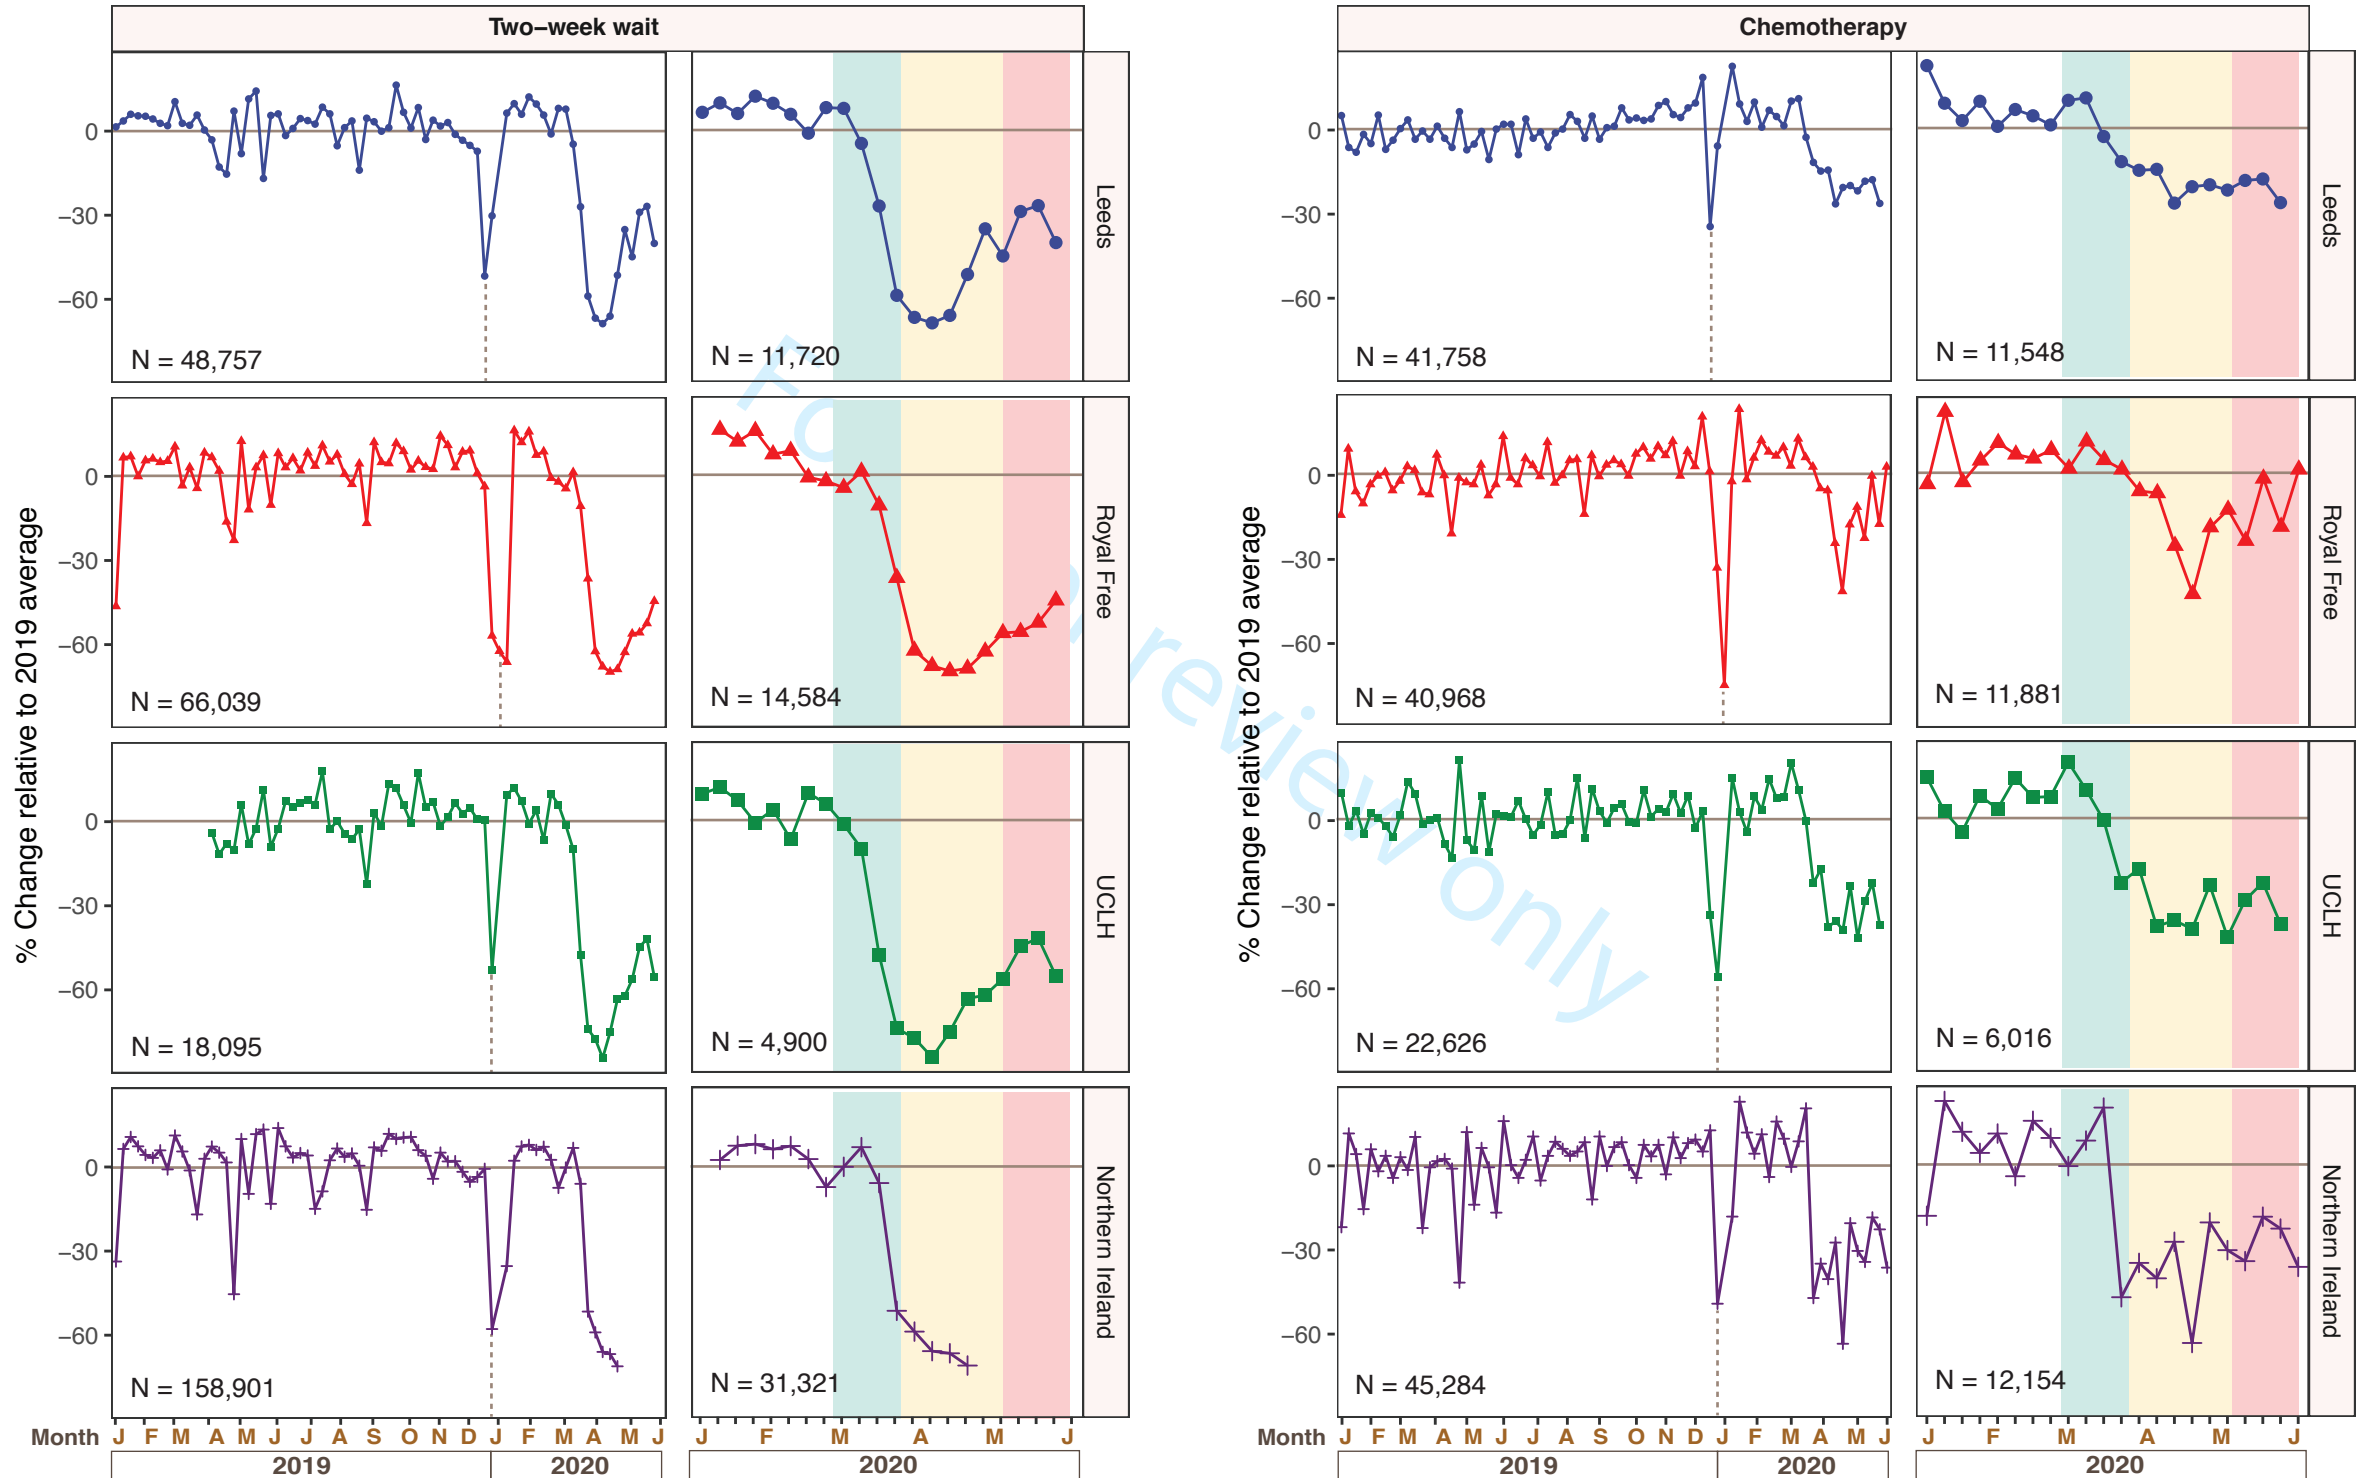

Phases of the pandemic

29 February 2020 day of 50th case <http://bmjopen.bmj.com/first400guidelines.xhtml>

11 May 2020 ease of lockdown

Page 17 of 26  
 Figure 2. Office for National Statistics data on weekly registrations of deaths in the England and Wales from 3 January 2020 to 15 May 2020. (A) Upper panel indicates the number of weekly deaths. (B) Lower panel indicates weekly changes in relative risk estimates calculated by comparing the current weekly deaths to 5-year weekly averages. Dates indicate week ending on a particular date.

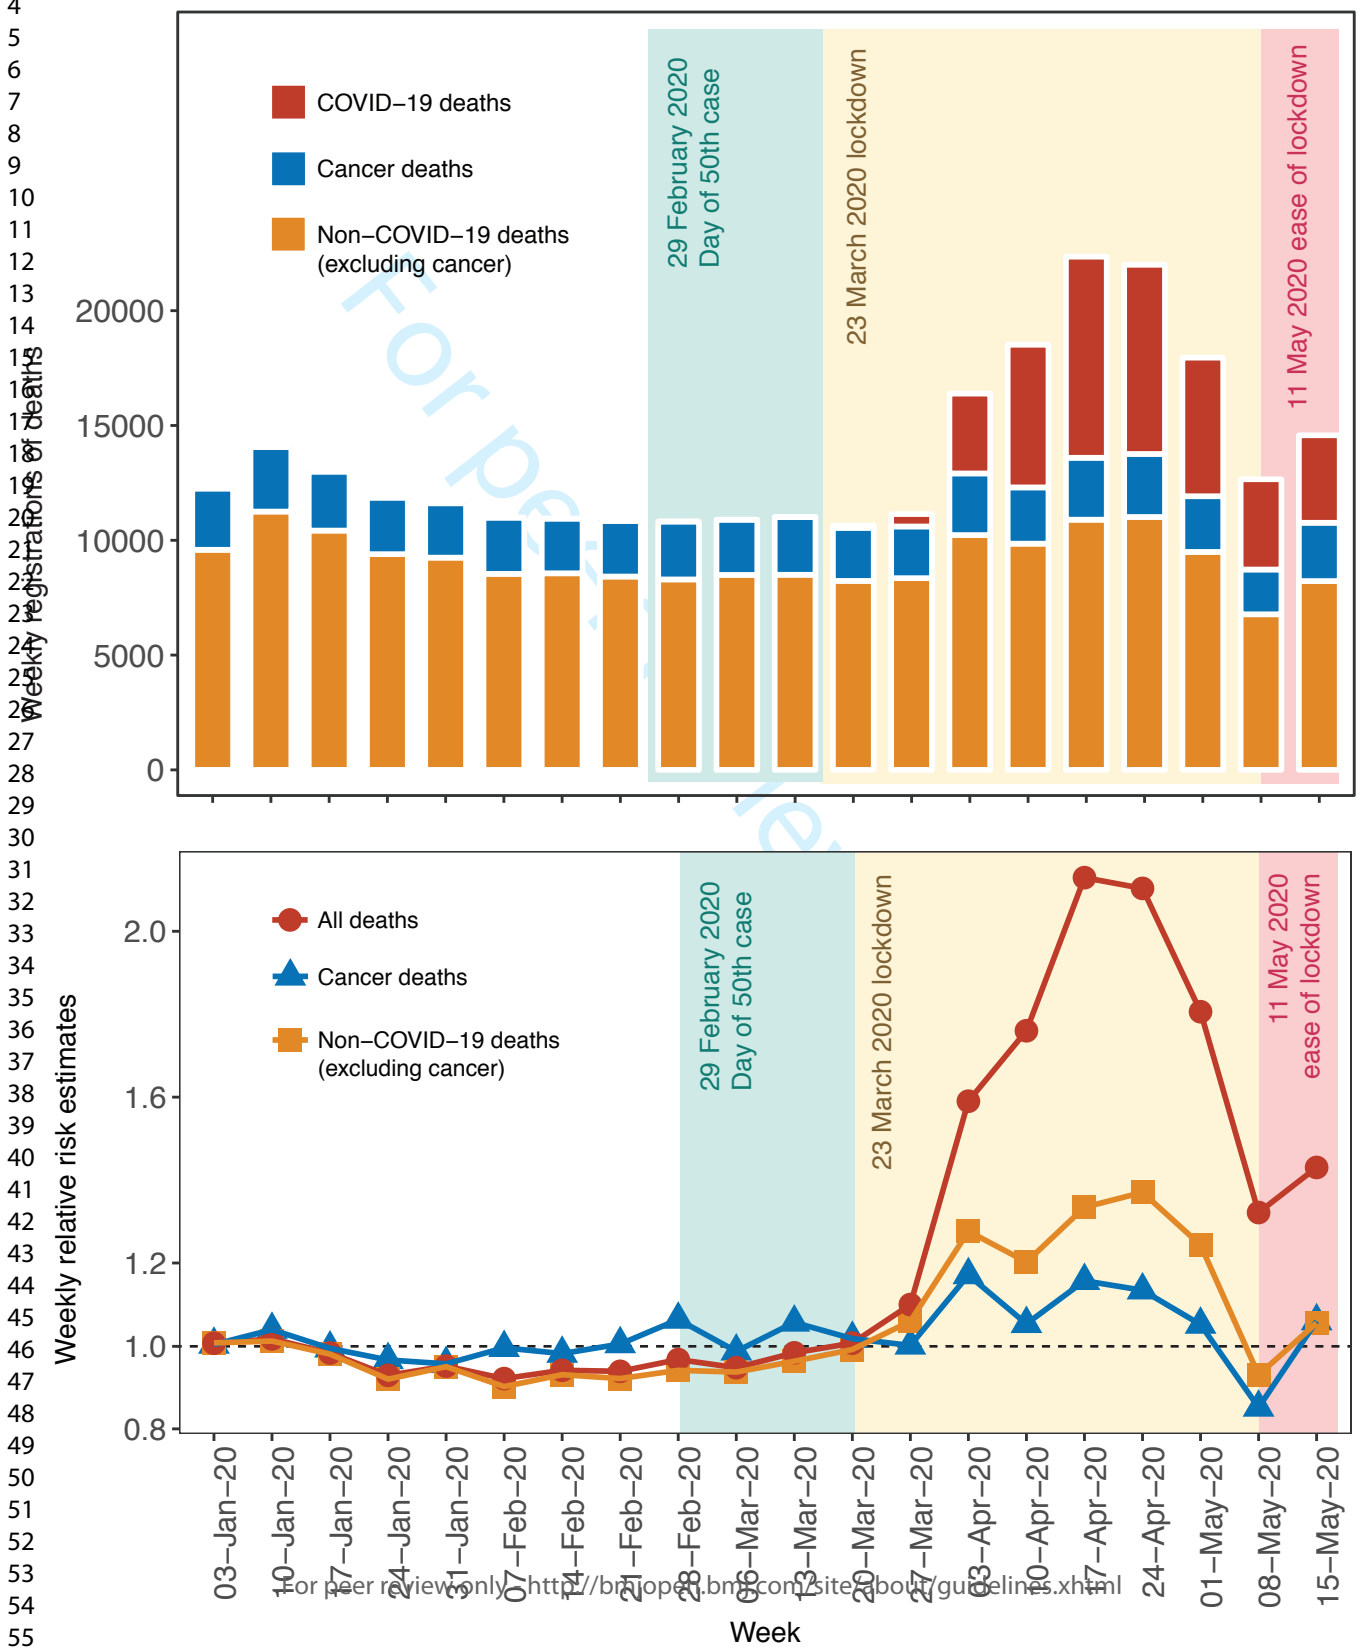

Figure 3. Estimated total (direct and indirect) excess deaths by cancer site over a 1-year period (A) 1-year mortality for incident and prevalent cancers. The whiskers are 95% confidence intervals. (B) Total excess deaths were scaled up to the population of England aged 30+ consisting of 35 million individuals using England mortality estimates for both incident and prevalent cancers combined. We estimated direct excess deaths at a 10% infection rate. We estimated total (direct and indirect) excess deaths for 40% (10% infected, 30% affected) and 80% (10% infected, 70% affected) of the population.

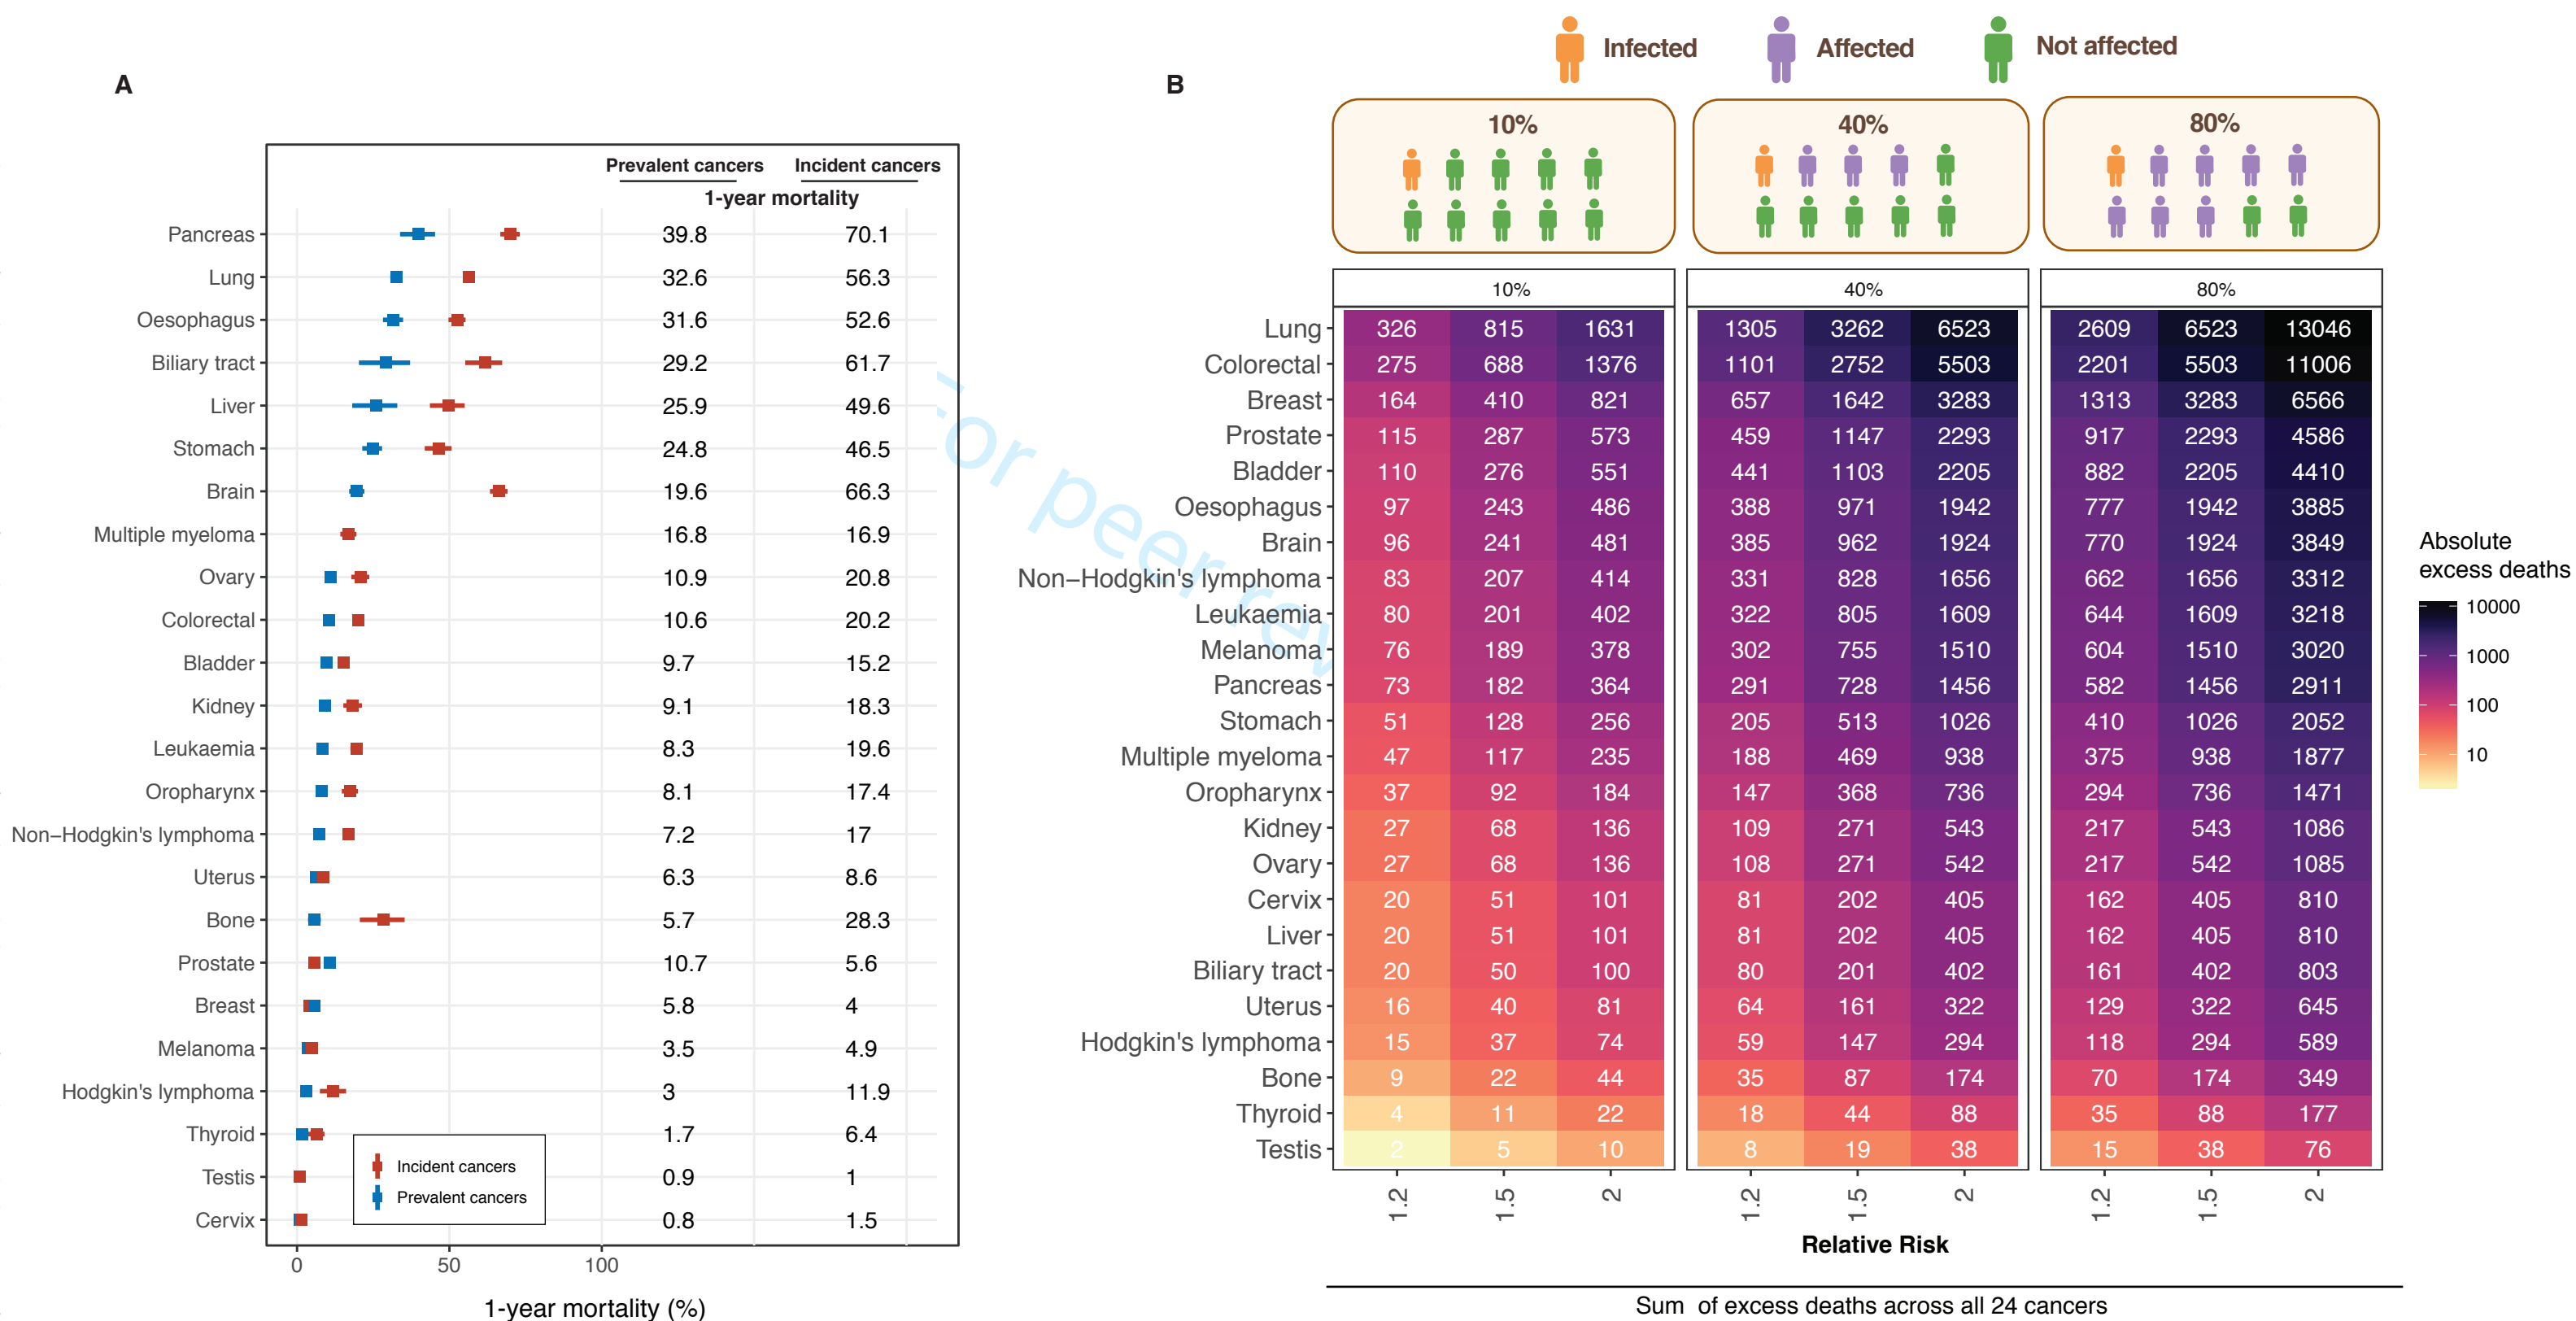

Figure 4. Total (direct and indirect) excess deaths for both incident and prevalent cancers by cancer site and number of comorbidities over a 1-year period. Stacked bar chart indicates the proportion of individuals with 0, 1, 2 and 3+ comorbidities by cancer site. We estimated total excess deaths for 40% (10% infected, 30% affected) of the population. Total excess deaths were scaled up to the population of England aged 30+ consisting of 35 million individuals using England mortality estimates for both incident and prevalent cancers combined.

1  
2  
3  
4  
5  
6  
7  
8  
9  
10  
11  
12  
13  
14  
15  
16  
17  
18  
19  
20  
21  
22  
23  
24  
25  
26  
27  
28  
29  
30  
31  
32  
33  
34  
35  
36  
37  
38  
39  
40  
41  
42  
43  
44  
45  
46  
47  
48  
49  
50  
51  
52  
53  
54  
55  
56  
57  
58  
59  
60

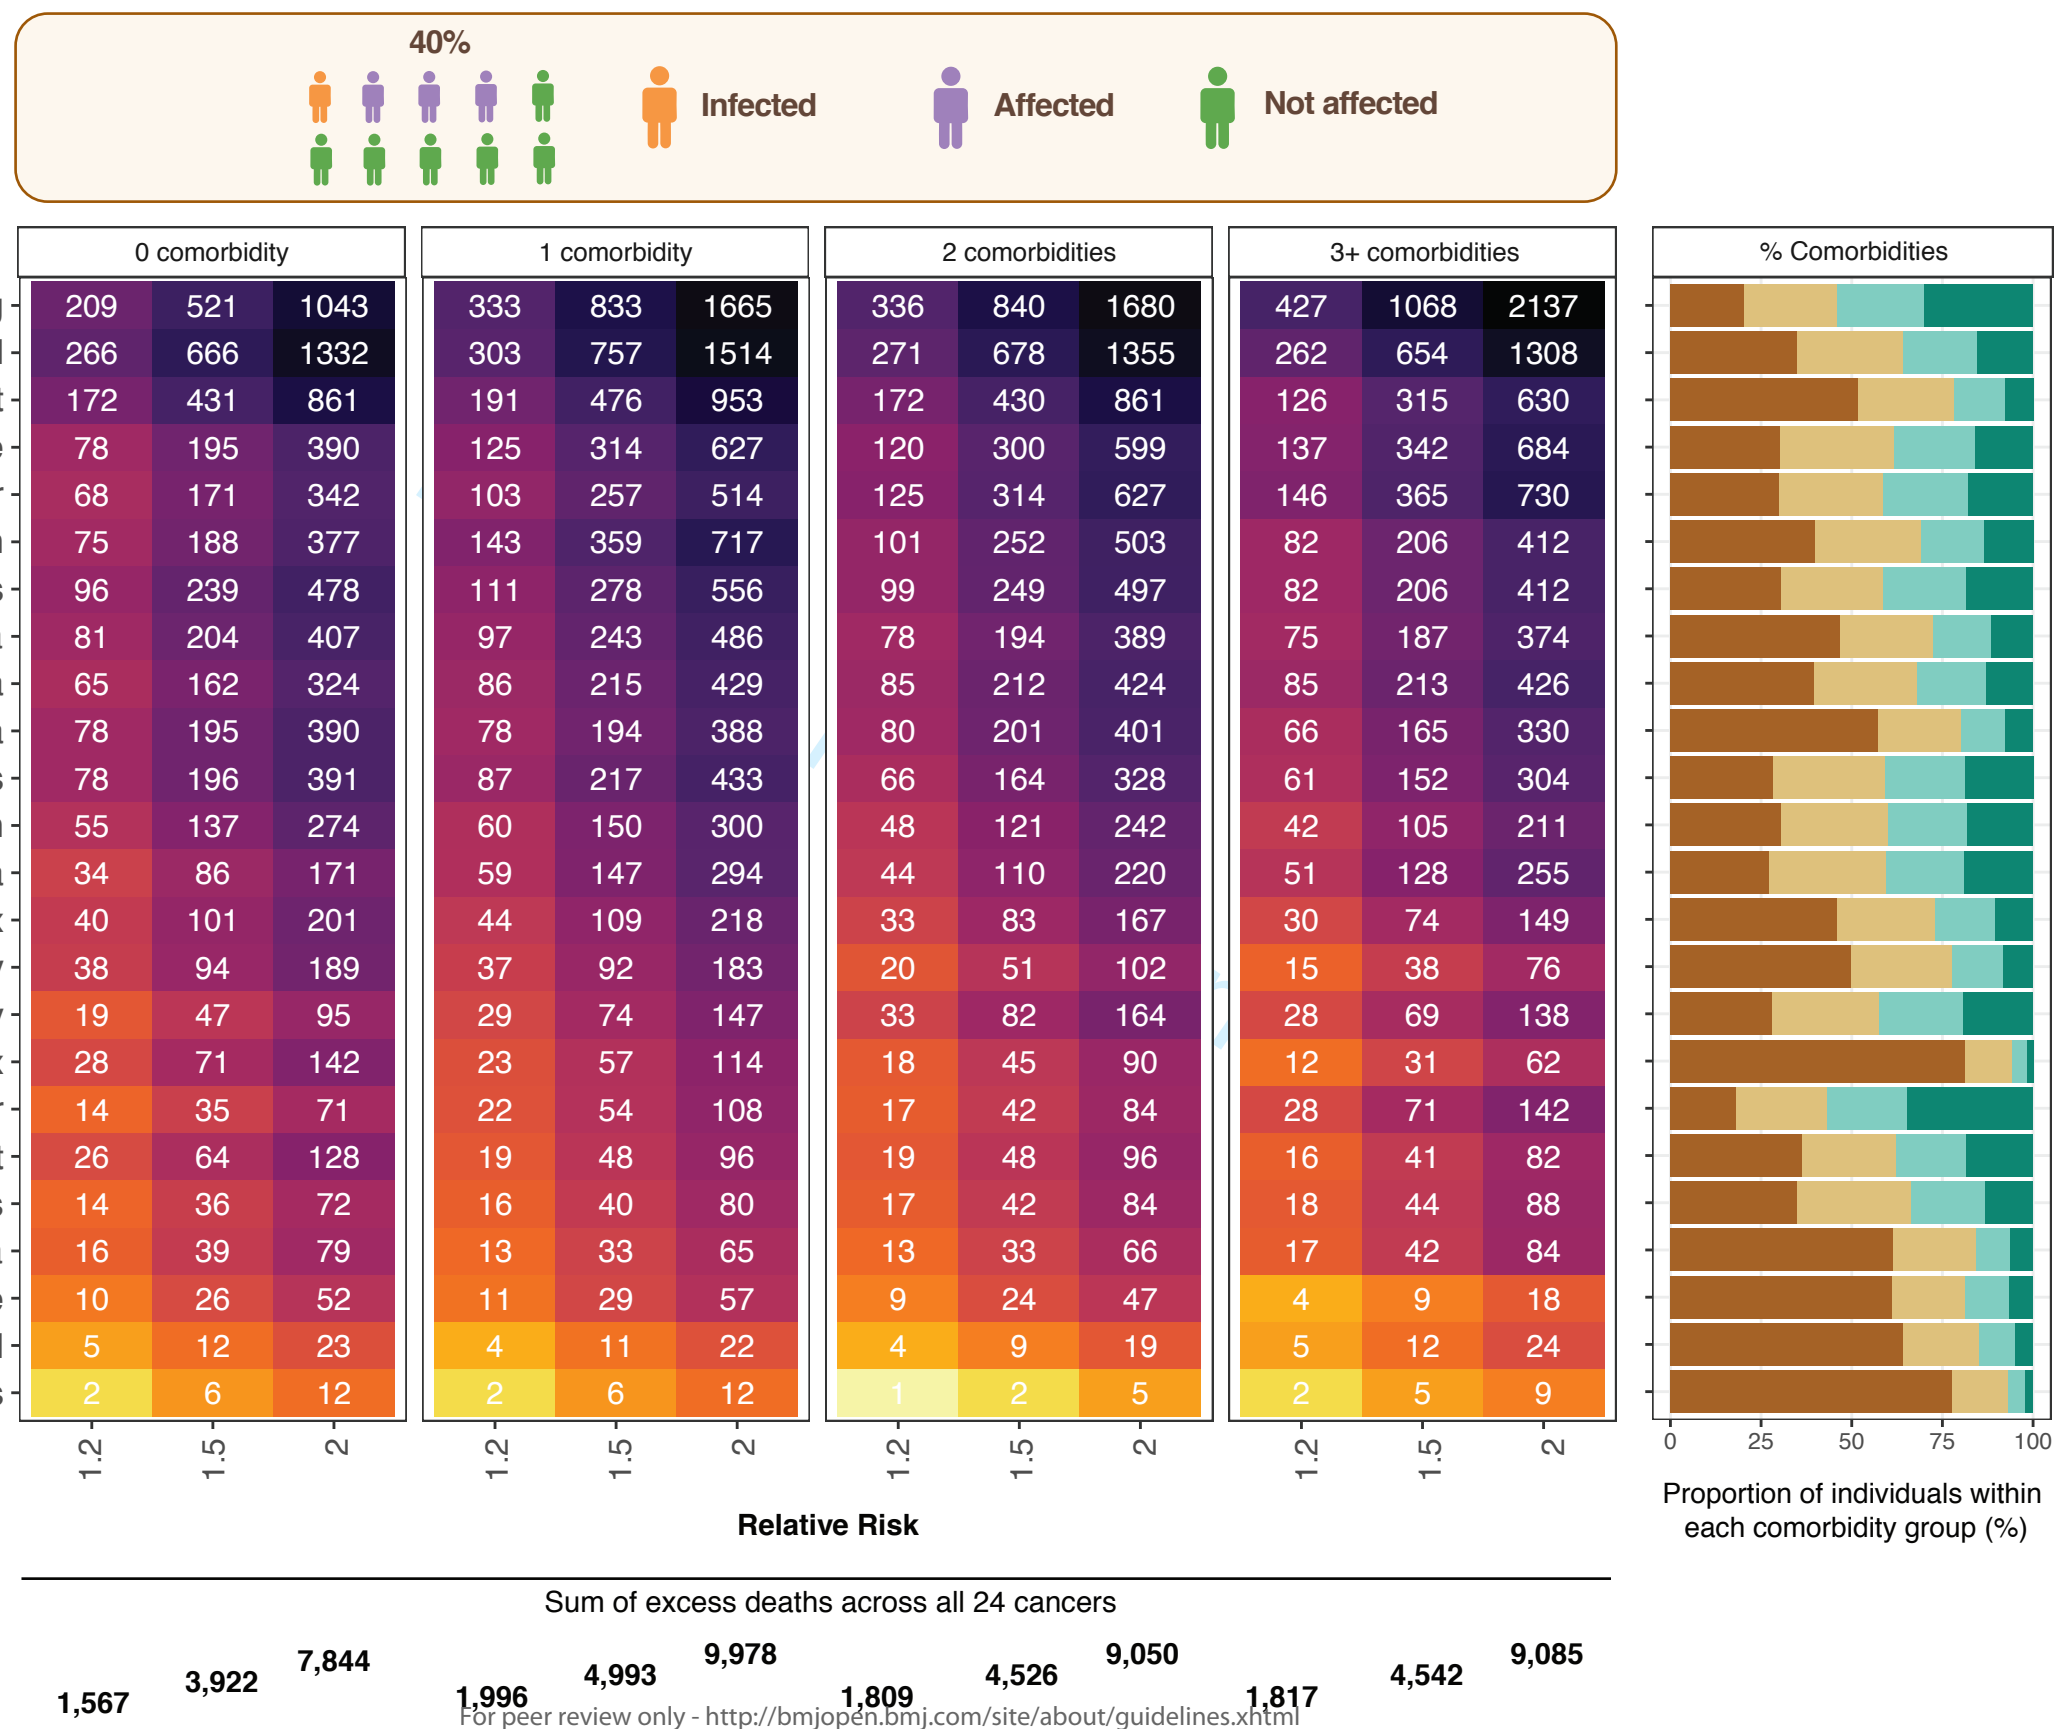

Figure S1. Age-adjusted incidence rates for 24 primary cancers from England and the UK (International Agency for Research on Cancer [IARC]) For England data, cervix refers to both carcinoma in situ of cervix and primary malignancy of cervix. For IARC data, only cervix uteri are included. CRUK: Cancer Research UK.

1  
2  
3  
4  
5  
6  
7  
8  
9  
10  
11  
12  
13  
14  
15  
16  
17  
18  
19  
20  
21  
22  
23  
24  
25  
26  
27  
28  
29  
30  
31  
32  
33  
34  
35  
36  
37  
38  
39  
40  
41  
42  
43  
44  
45  
46  
47  
48

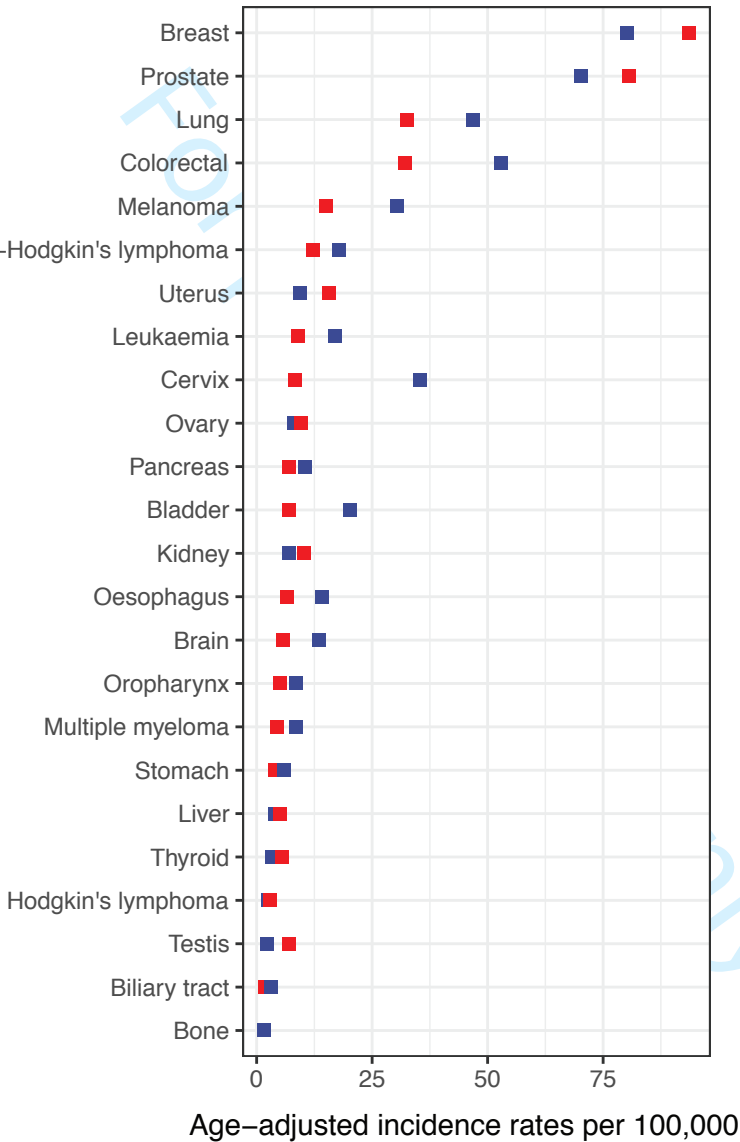

**All cancer incidence rate**

■ England (CALIBER) 635 per 100,000  
■ UK (IARC) 590 per 100,000 (from CRUK)



Figure S2. Total excess deaths for incident cancers over a 1-year period scaled up to the population of England aged 30+ consisting of 35 million individuals using England mortality estimates. We estimated direct excess deaths at a 10% infection rate. We estimated total (direct and indirect) excess deaths for 40% (10% infected, 30% affected) and 80% (10% infected, 70% affected) of the population.

1  
2  
3  
4  
5  
6  
7  
8  
9  
10  
11  
12  
13  
14  
15  
16  
17  
18  
19  
20  
21  
22  
23  
24  
25  
26  
27  
28  
29  
30  
31  
32  
33  
34  
35  
36  
37  
38  
39  
40  
41  
42  
43  
44  
45  
46  
47  
48  
49  
50  
51  
52  
53  
54  
55  
56  
57  
58  
59

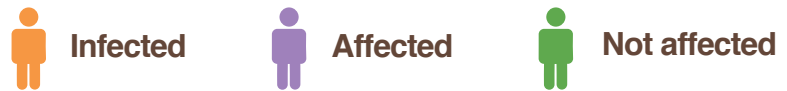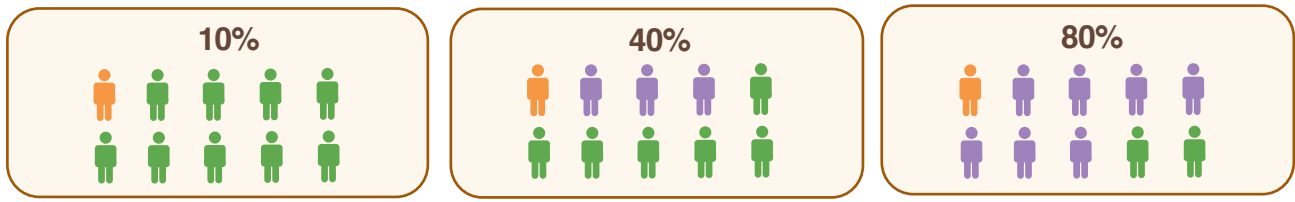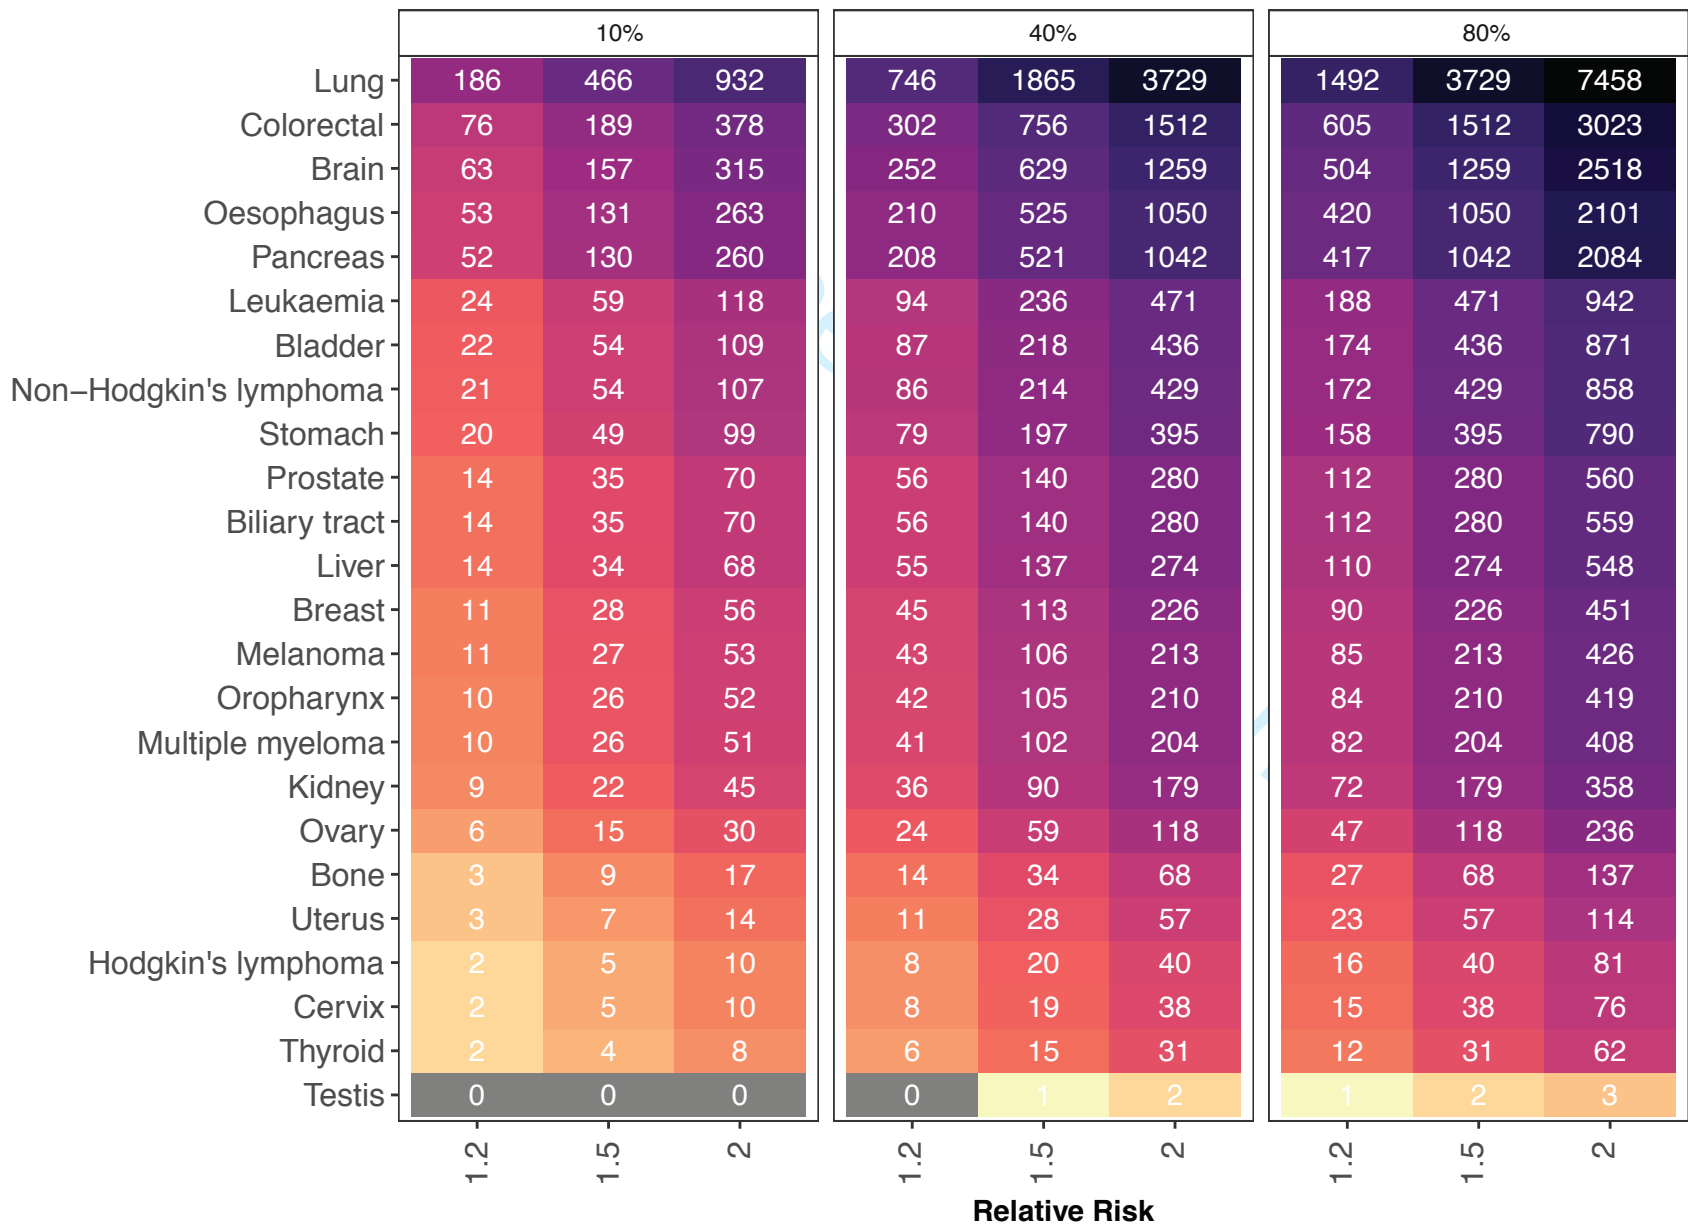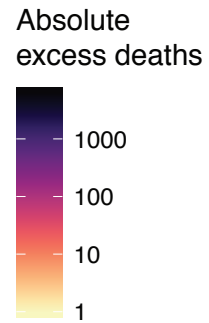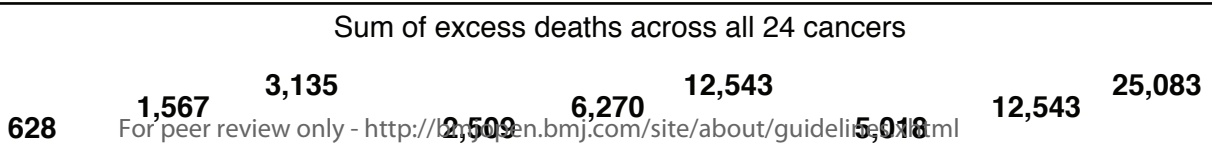

Figure S3. Total excess deaths for prevalent cancers over a 1-year period scaled up to the population of England aged 30+ consisting of 35 million individuals using England mortality estimates. We estimated direct excess deaths at a 10% infection rate. We estimated total (direct and indirect) excess deaths for 40% (10% infected, 30% affected) and 80% (10% infected, 70% affected) of the population.

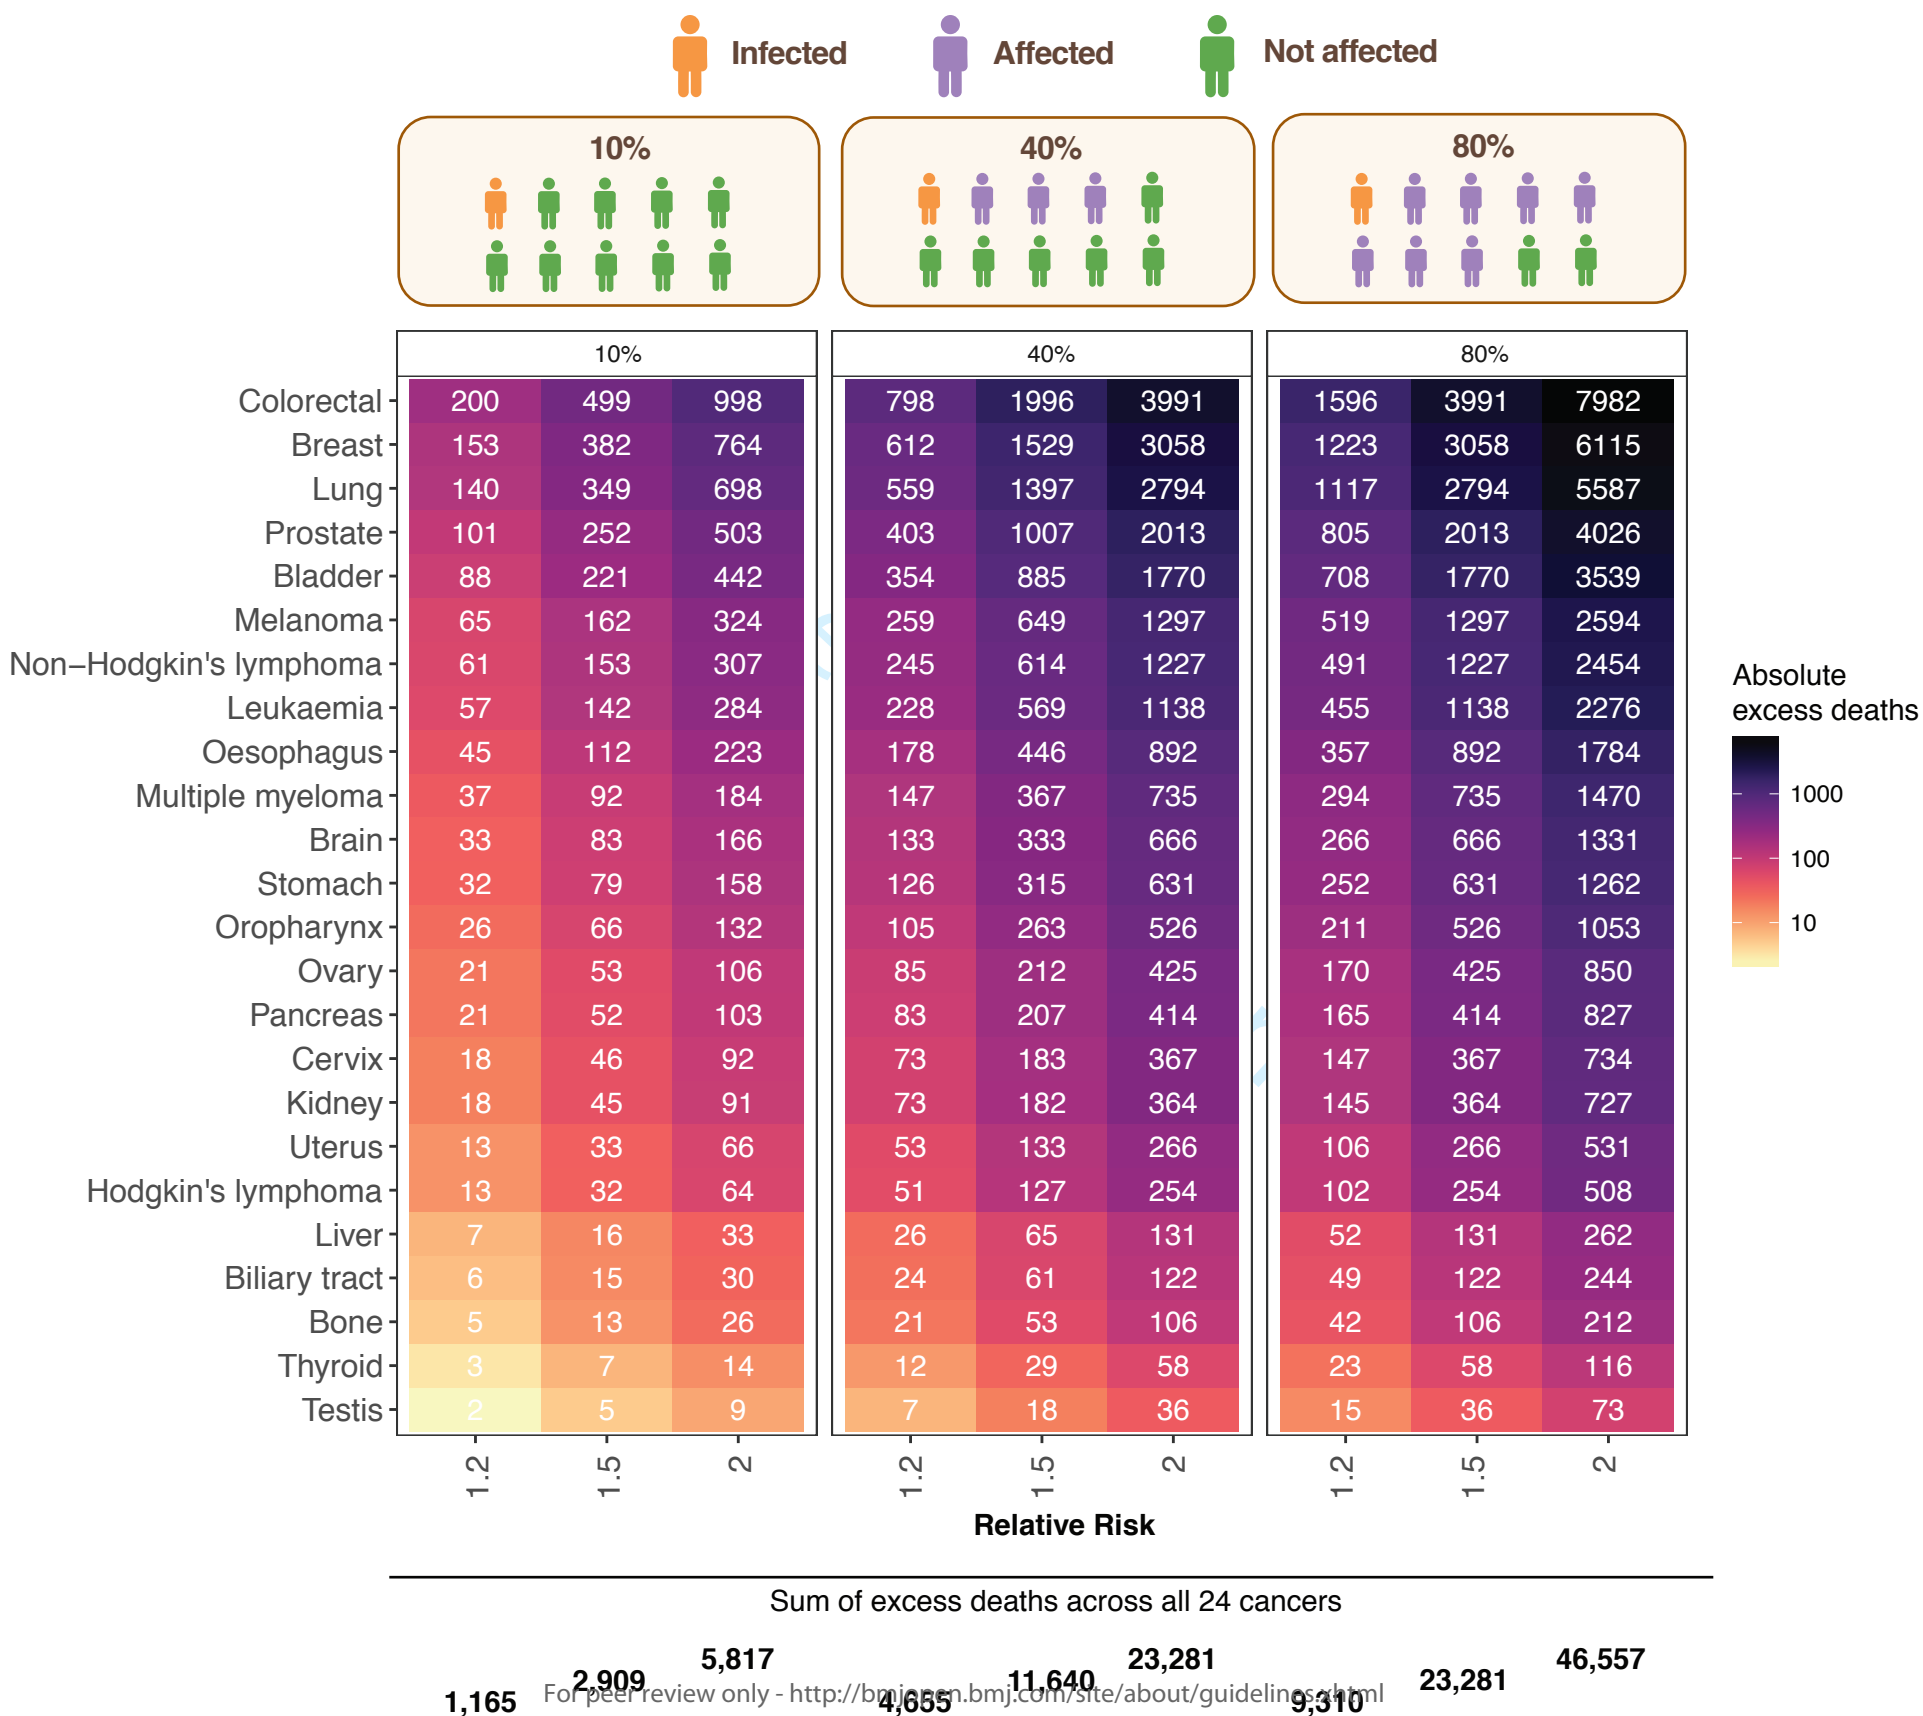

Figure S4. Proportion of patients with any of the 15 comorbidity clusters by cancer site for incident cancers (N=199,057) in a population of 3,862,012 adults in England. Age indicates mean age at diagnosis.

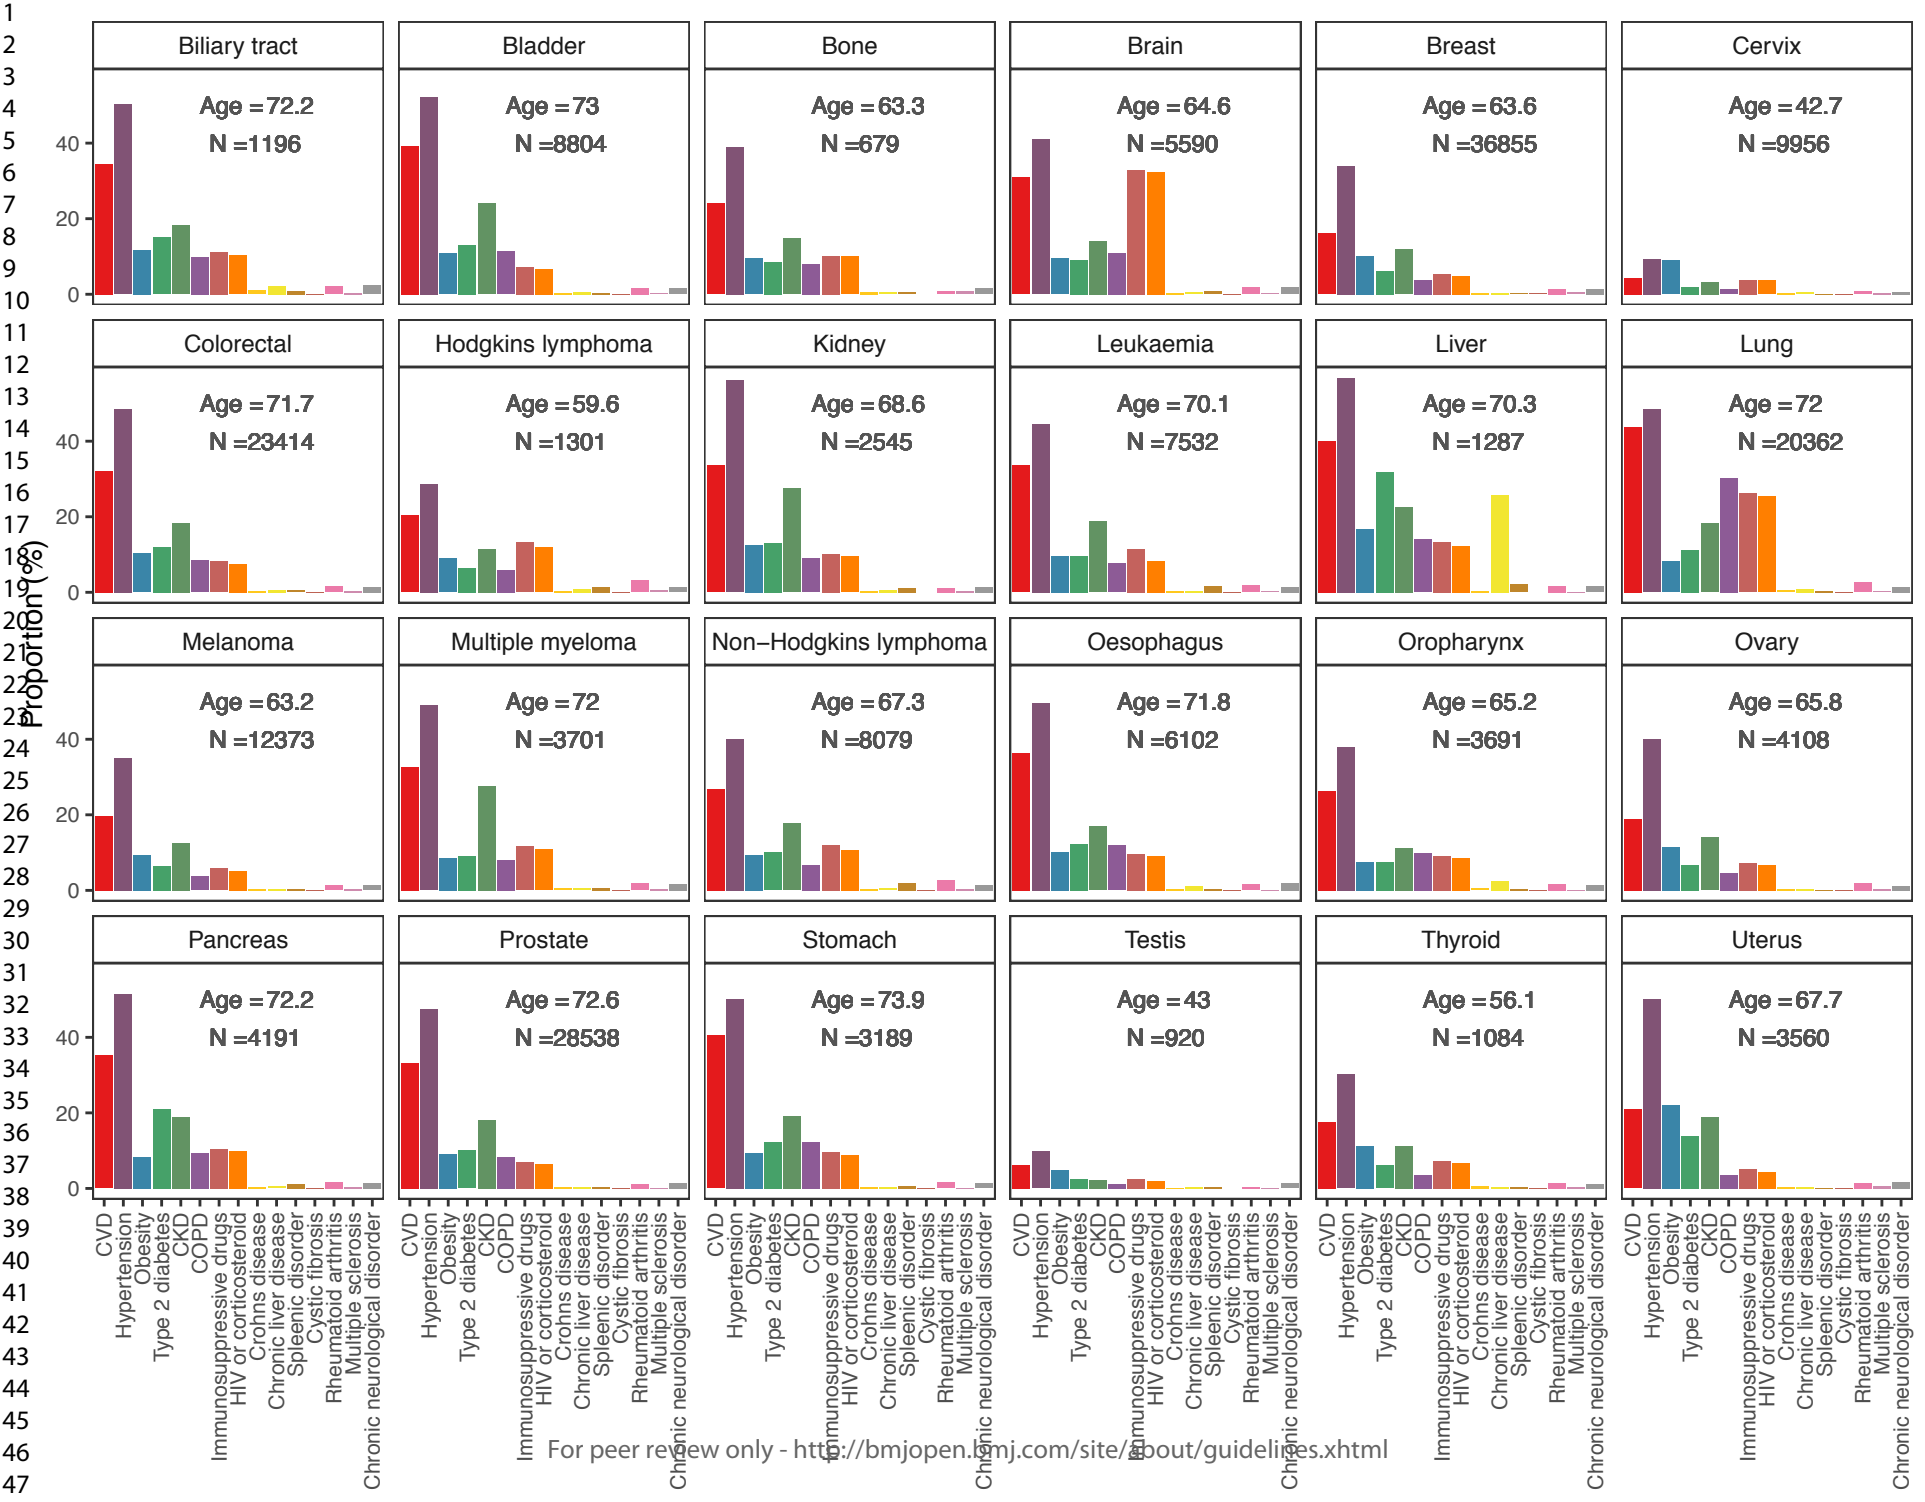

Figure S5. Proportion of patients with any of the 15 comorbidity clusters by cancer site for prevalent cancers (N=117,978) in a population of 3,862,012 adults in England. Age indicates mean age at diagnosis.

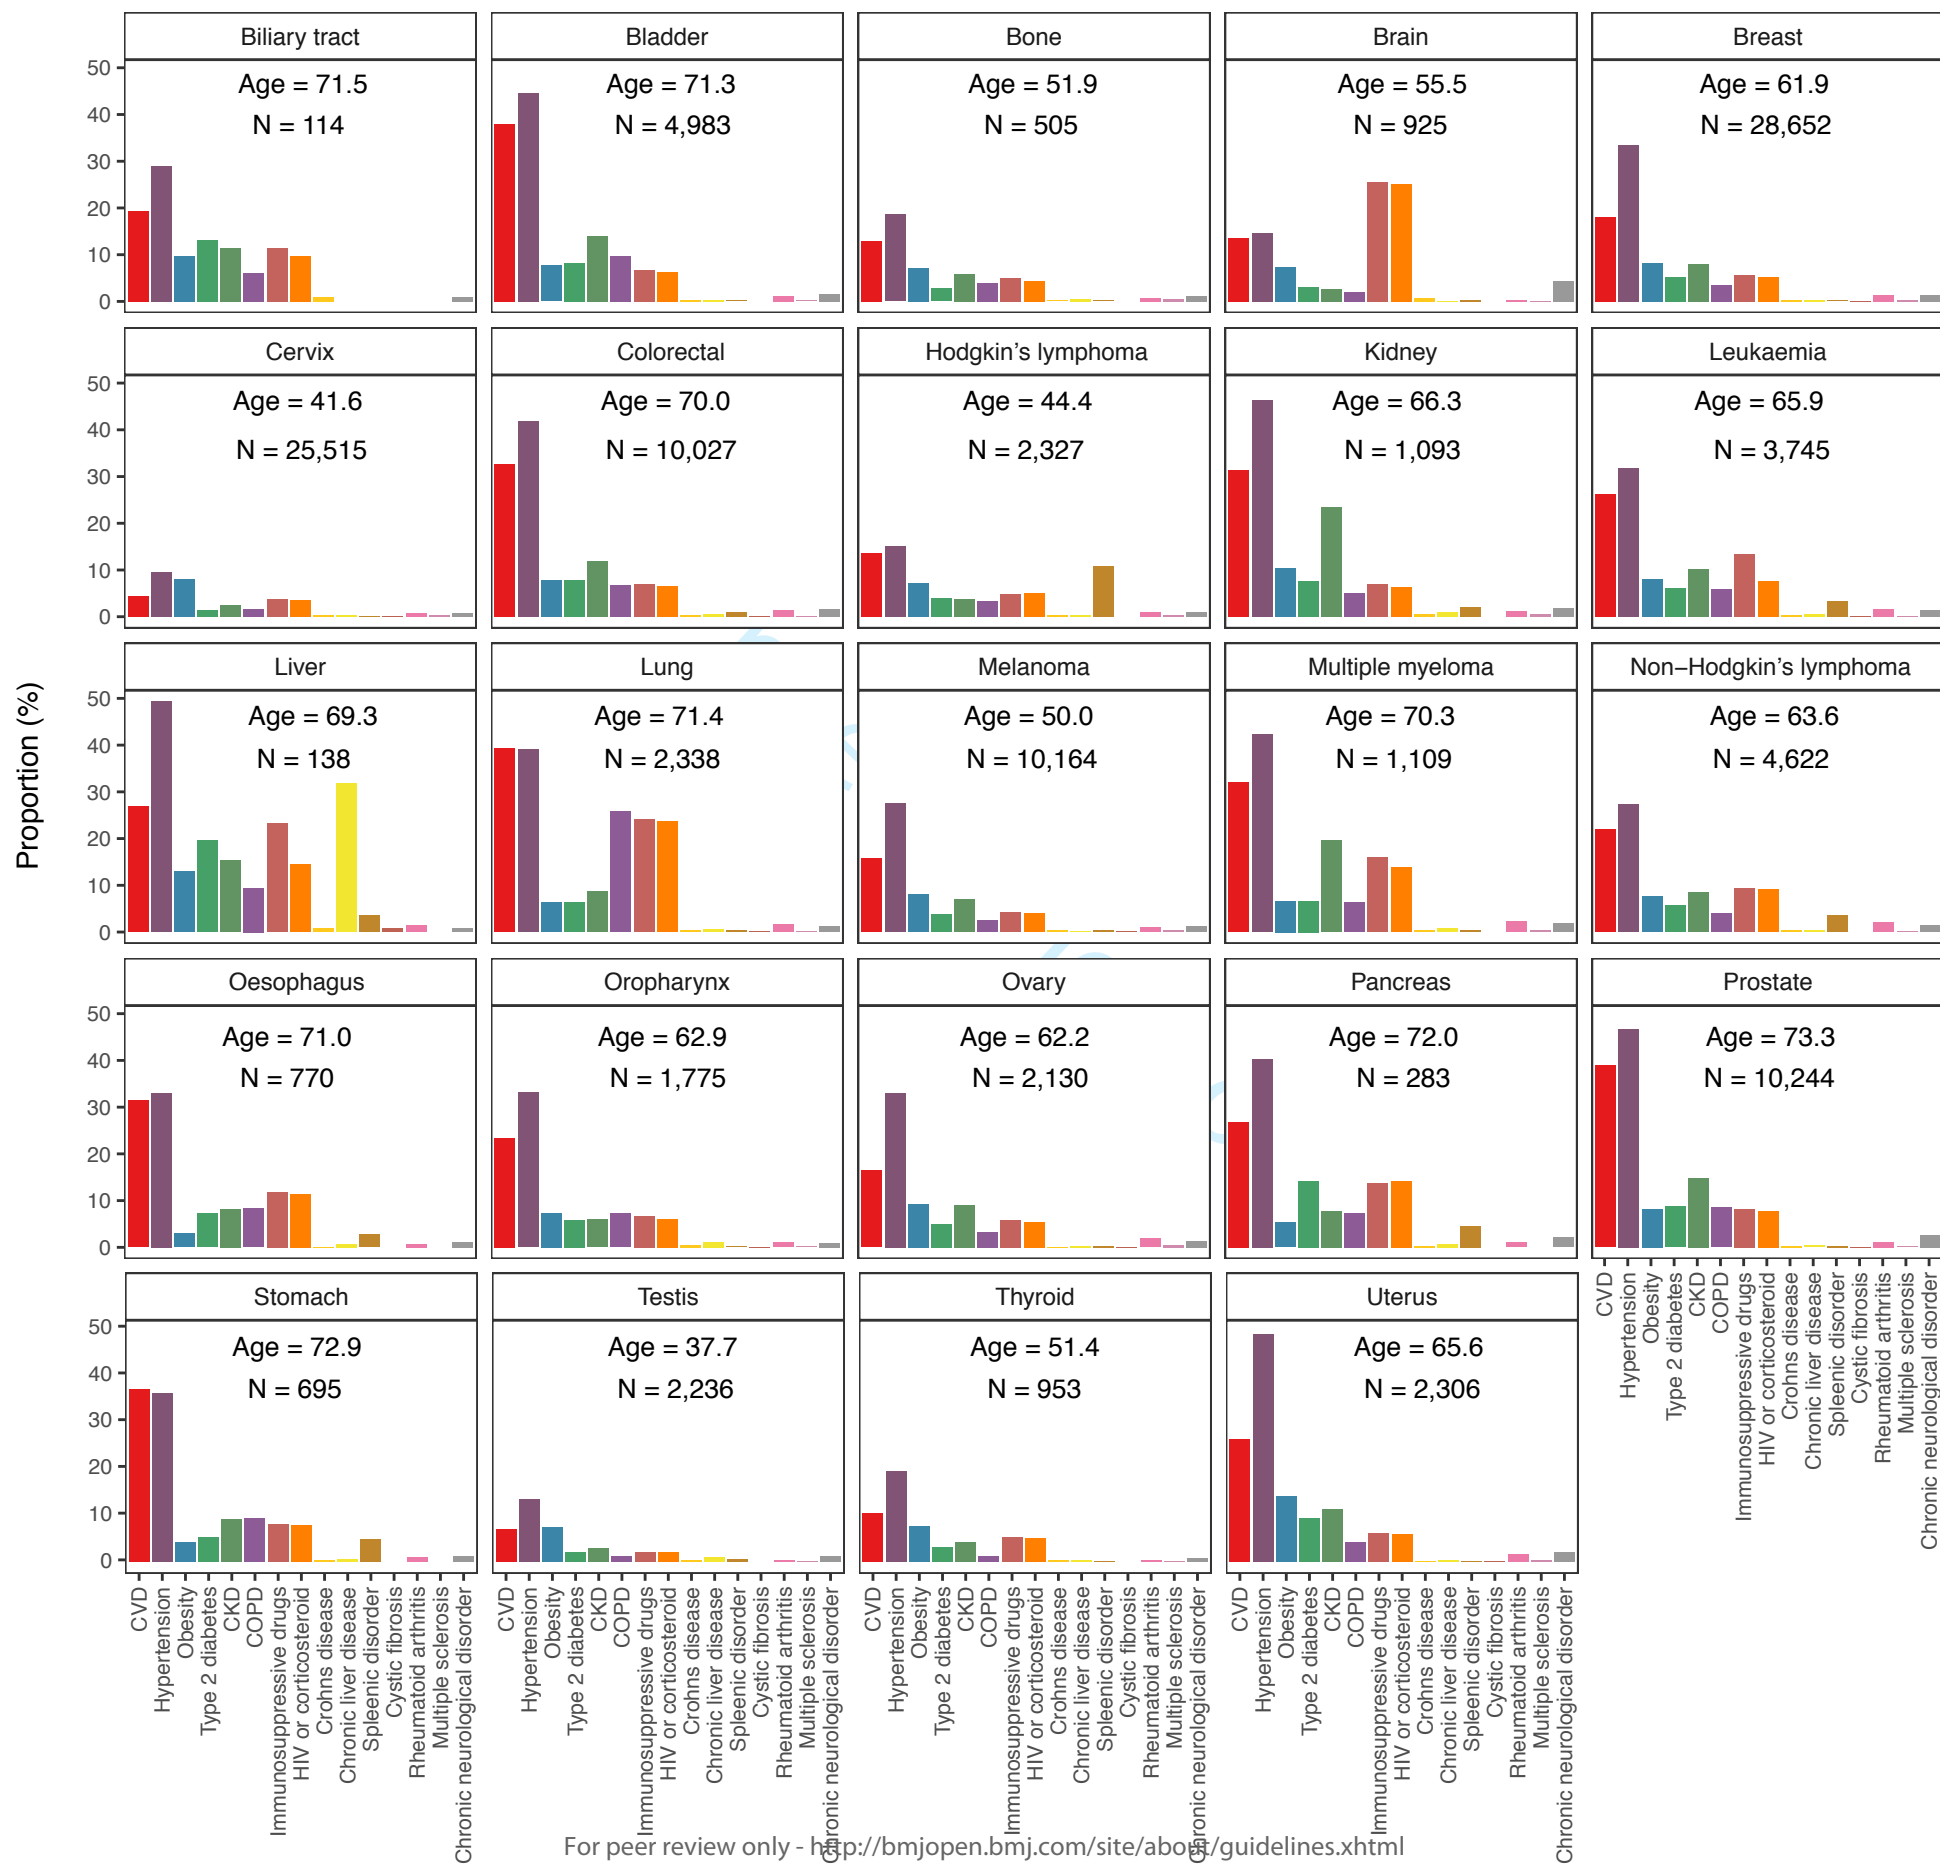

Figure S6. Forest plot of background (pre-COVID-19) 1-year cancer mortality for incident cases according to cancer site and number of underlying comorbidities in England. The whiskers are 95% confidence intervals.

1  
2  
3  
4  
5  
6  
7  
8  
9  
10  
11  
12  
13  
14  
15  
16  
17  
18  
19  
20  
21  
22  
23  
24  
25  
26  
27  
28  
29  
30  
31  
32  
33  
34  
35  
36  
37  
38  
39  
40

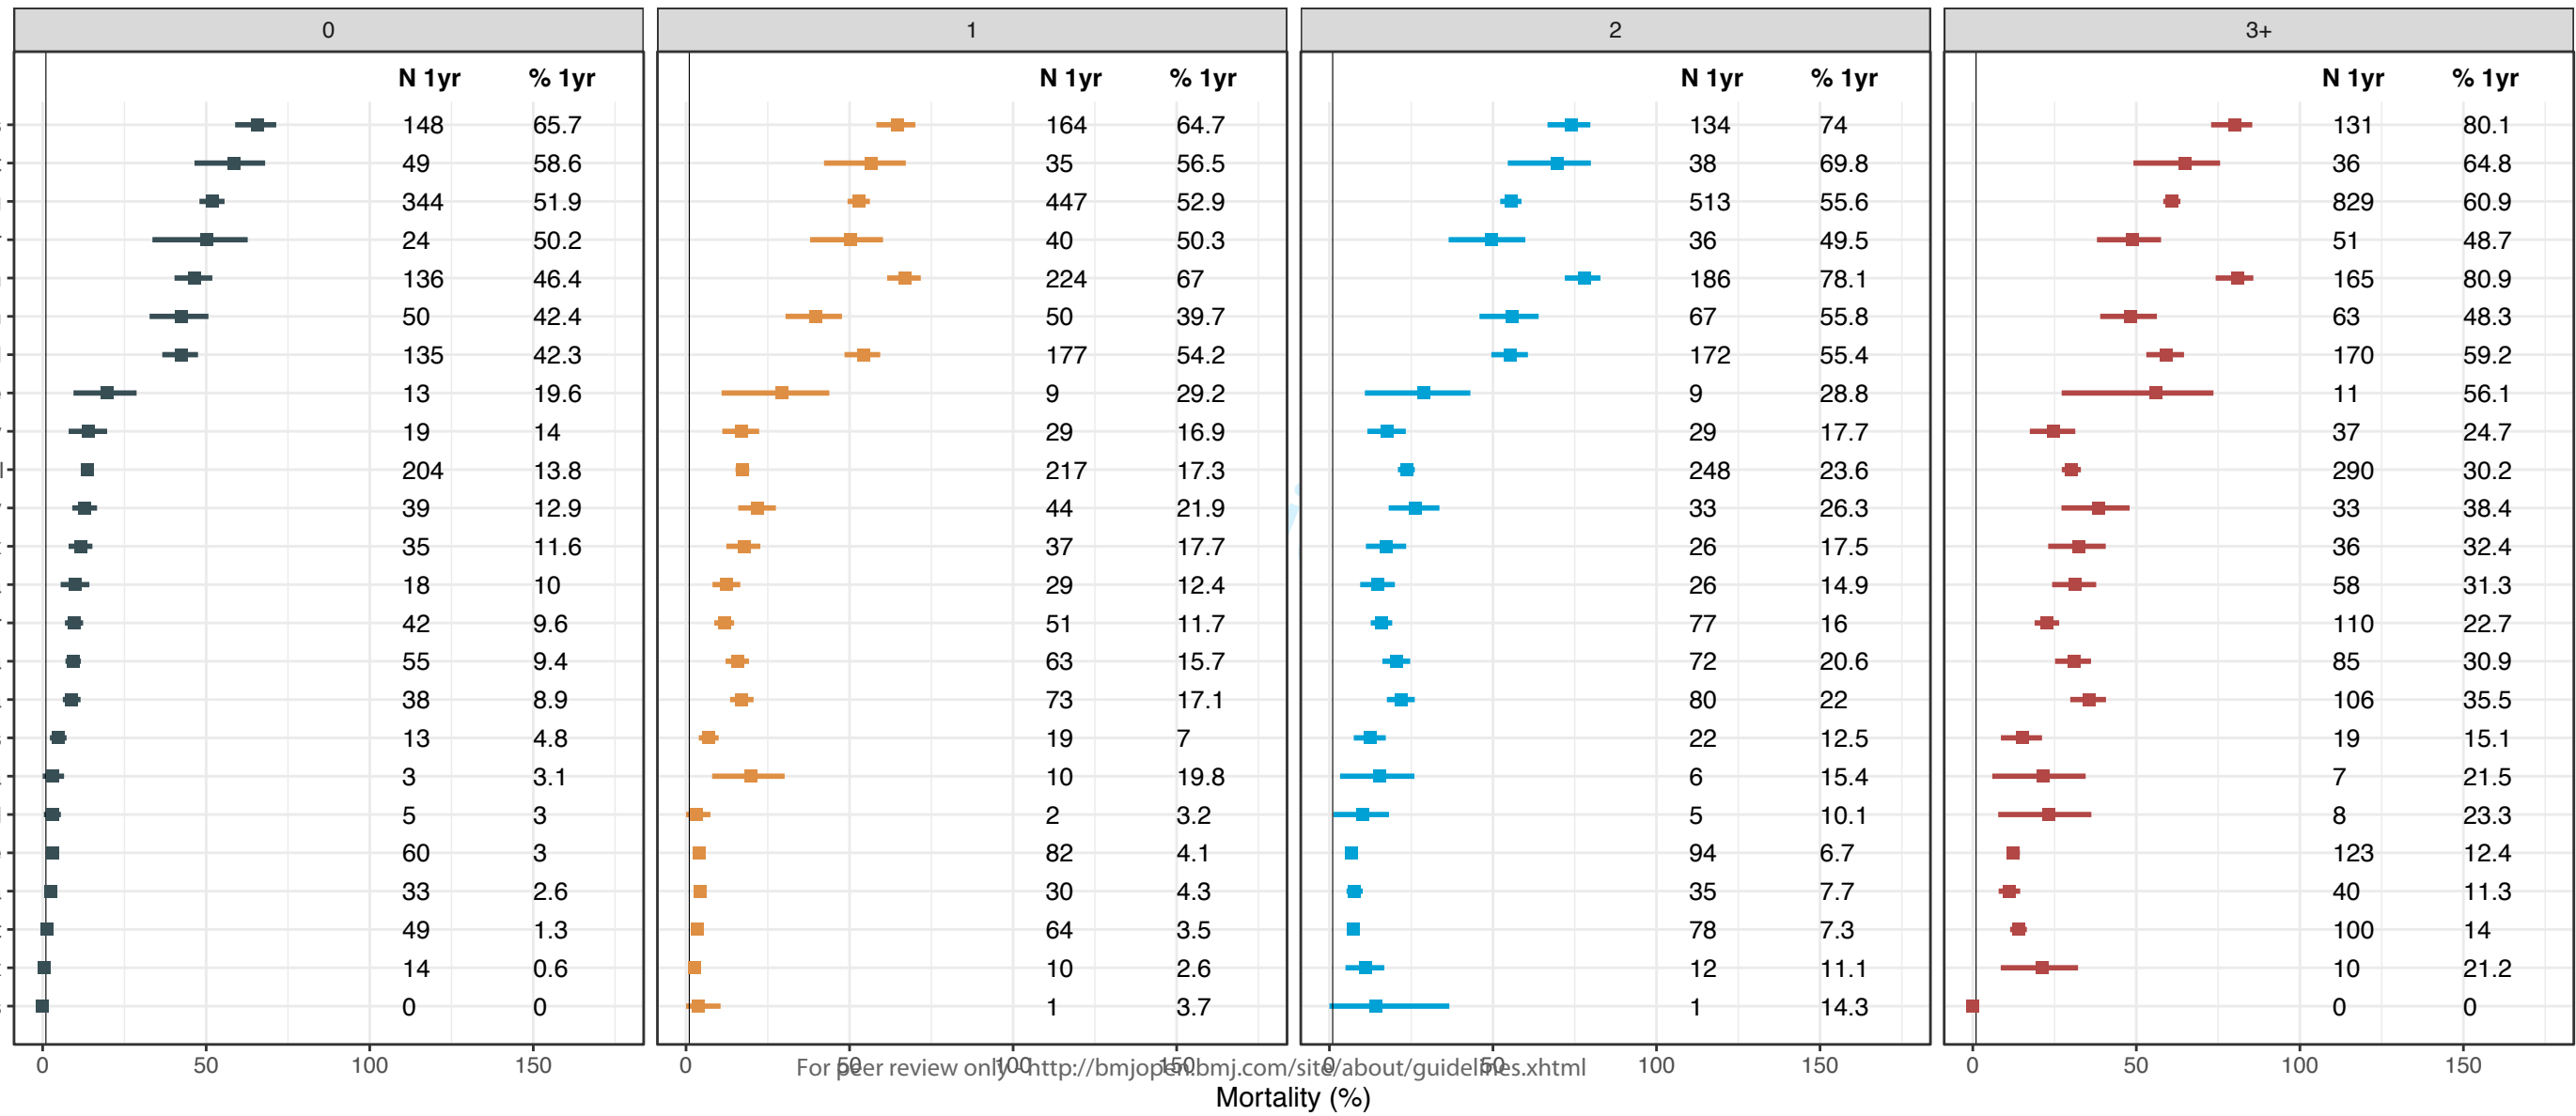

For peer review only: <http://bmjopen.bmj.com/site/about/guidelines.xhtml>

Mortality (%)

Figure S7. Forest plot of background (pre-COVID-19) 1-year cancer mortality for prevalent cases according to cancer site and number of underlying comorbidities in England. The whiskers are 95% confidence intervals.

1  
2  
3  
4  
5  
6  
7  
8  
9  
10  
11  
12  
13  
14  
15  
16  
17  
18  
19  
20  
21  
22  
23  
24  
25  
26  
27  
28  
29  
30  
31  
32  
33  
34  
35  
36  
37  
38  
39  
40

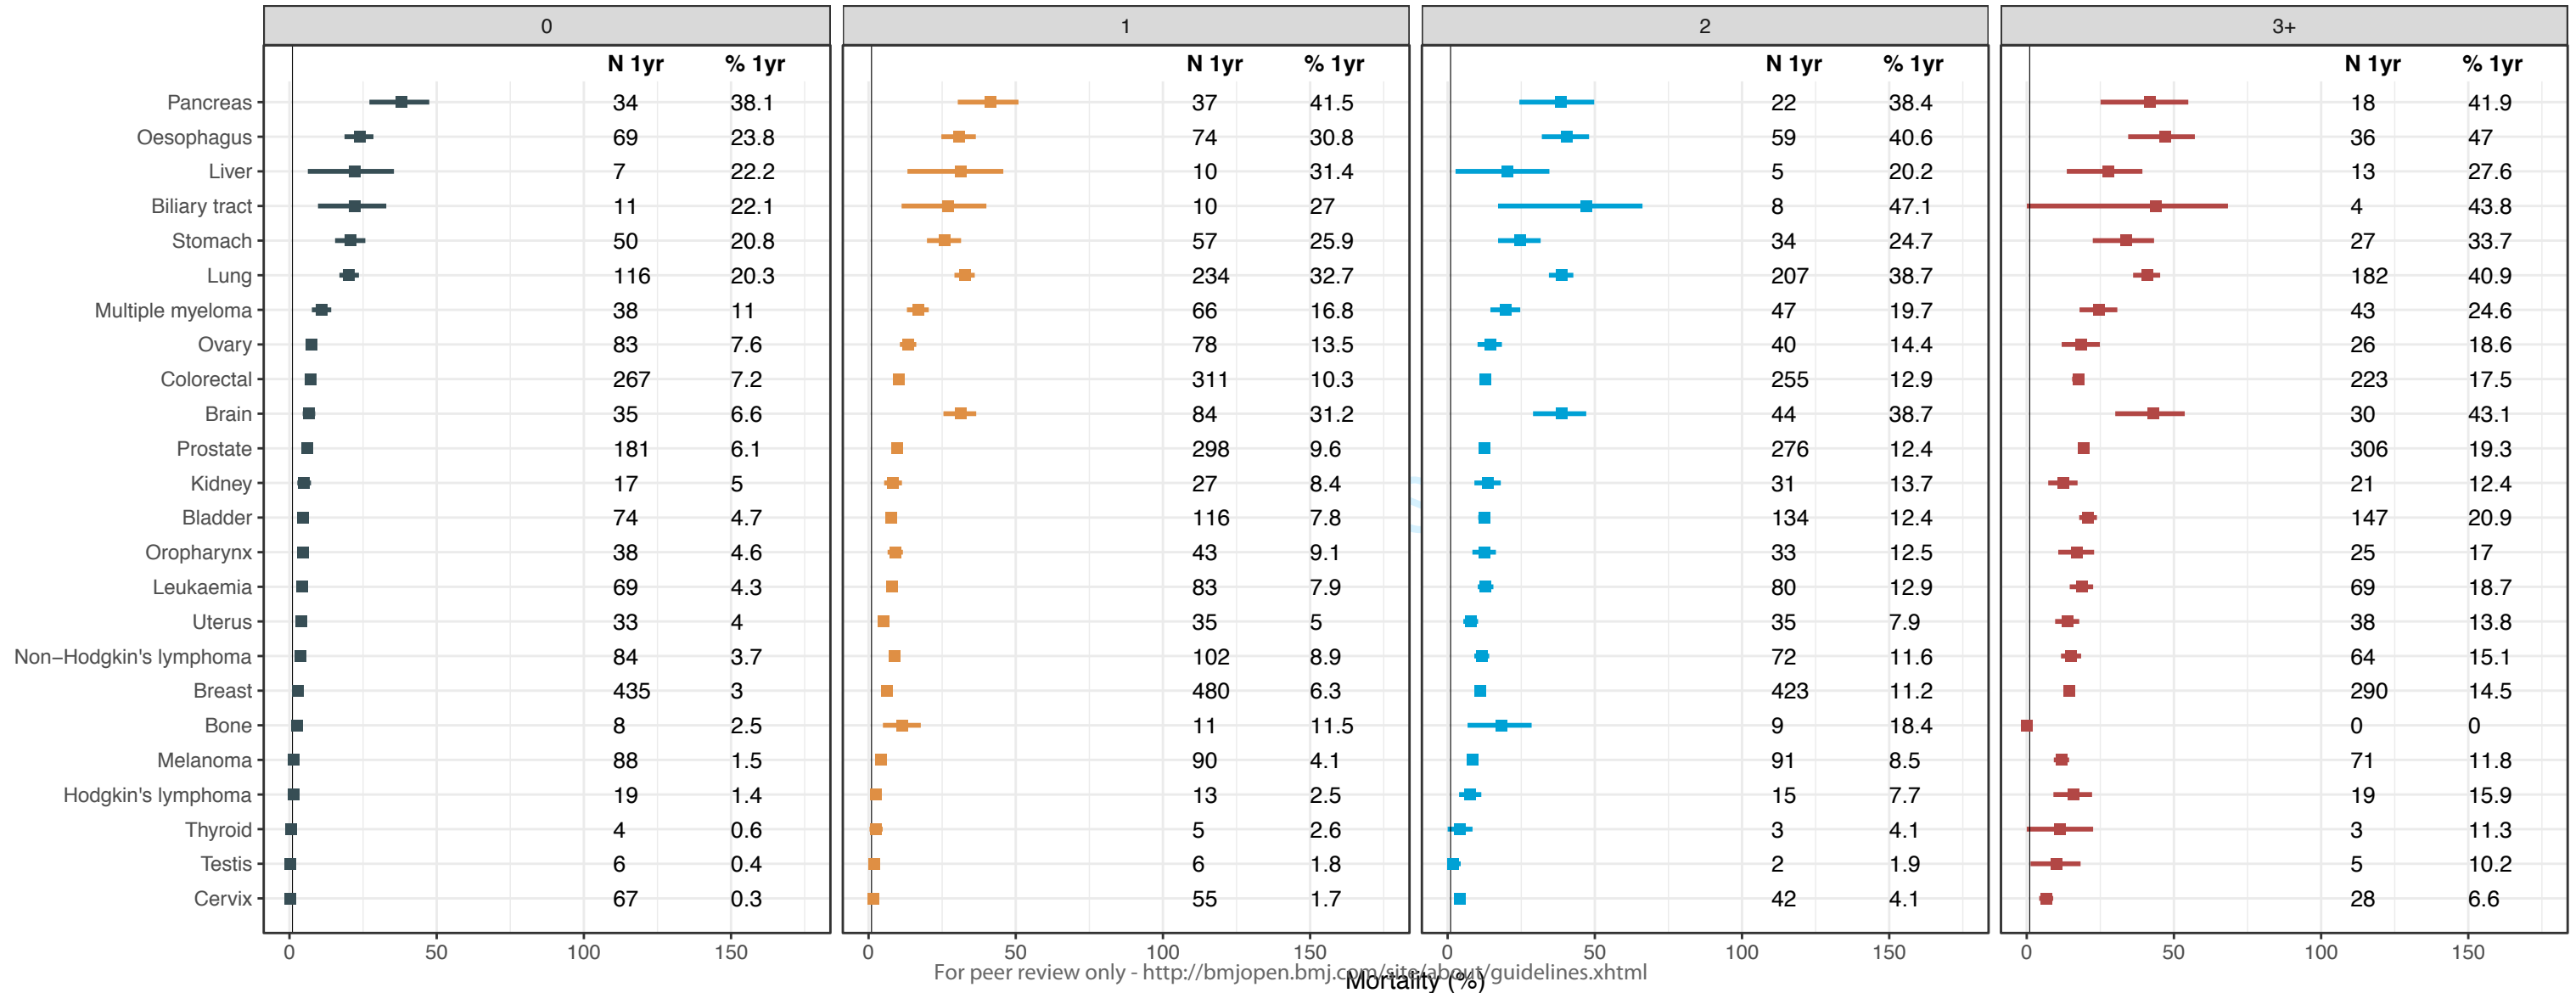

Figure S8. Total (direct and indirect) excess deaths for incident cancers by cancer site and number of comorbidities over a 1-year period. Stacked bar chart indicates the proportion of individuals with 0, 1, 2 and 3+ comorbidities by cancer site. We estimated total excess deaths for 40% (10% infected, 30% affected) of the population. Total excess deaths were scaled up to the population of England aged 30+ consisting of 35 million individuals using England mortality estimates for incident cancers.

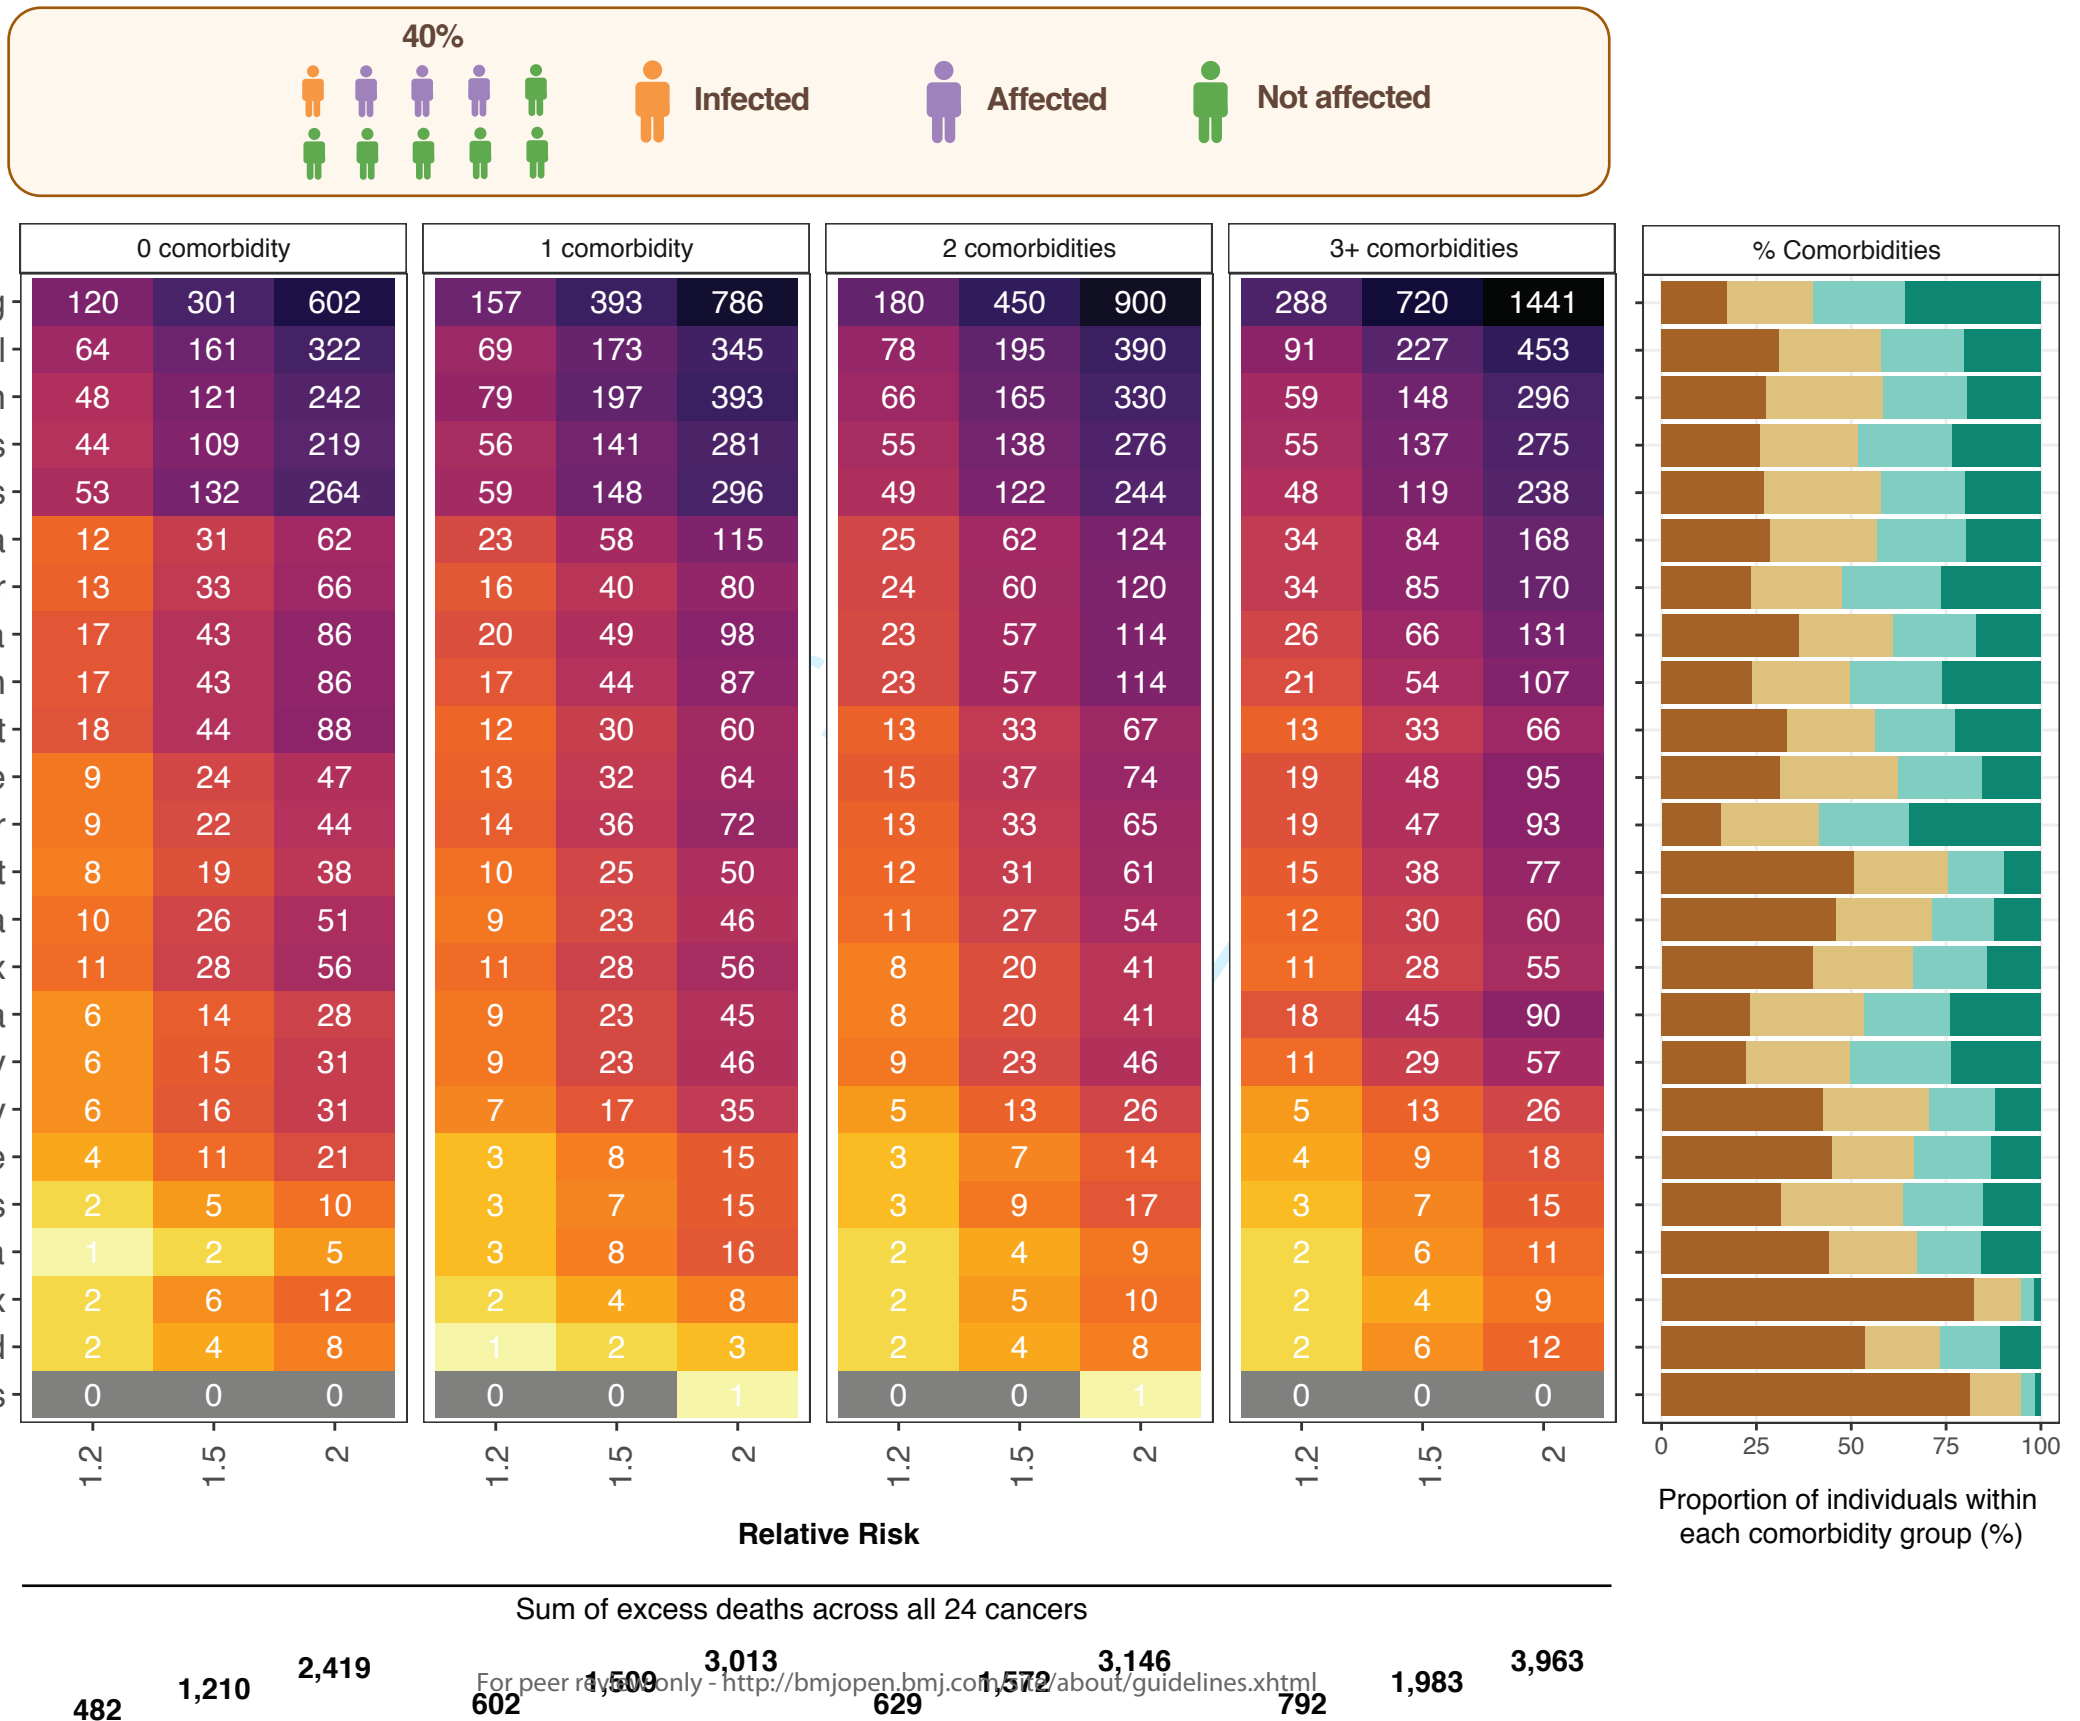

Figure S9. Total (direct and indirect) excess deaths for prevalent cancers by cancer site and number of comorbidities over a 1-year period. Stacked bar chart indicates the proportion of individuals with 0, 1, 2 and 3+ comorbidities by cancer site. We estimated total excess deaths for 40% (10% infected, 30% affected) of the population. Total excess deaths were scaled up to the population of England aged 30+ consisting of 35 million individuals using England mortality estimates for prevalent cancers.

1  
2  
3  
4  
5  
6  
7  
8  
9  
10  
11  
12  
13  
14  
15  
16  
17  
18  
19  
20  
21  
22  
23  
24  
25  
26  
27  
28  
29  
30  
31  
32  
33  
34  
35  
36  
37  
38  
39  
40  
41  
42  
43  
44  
45  
46  
47  
48  
49  
50  
51  
52  
53  
54  
55  
56  
57  
58  
59  
60

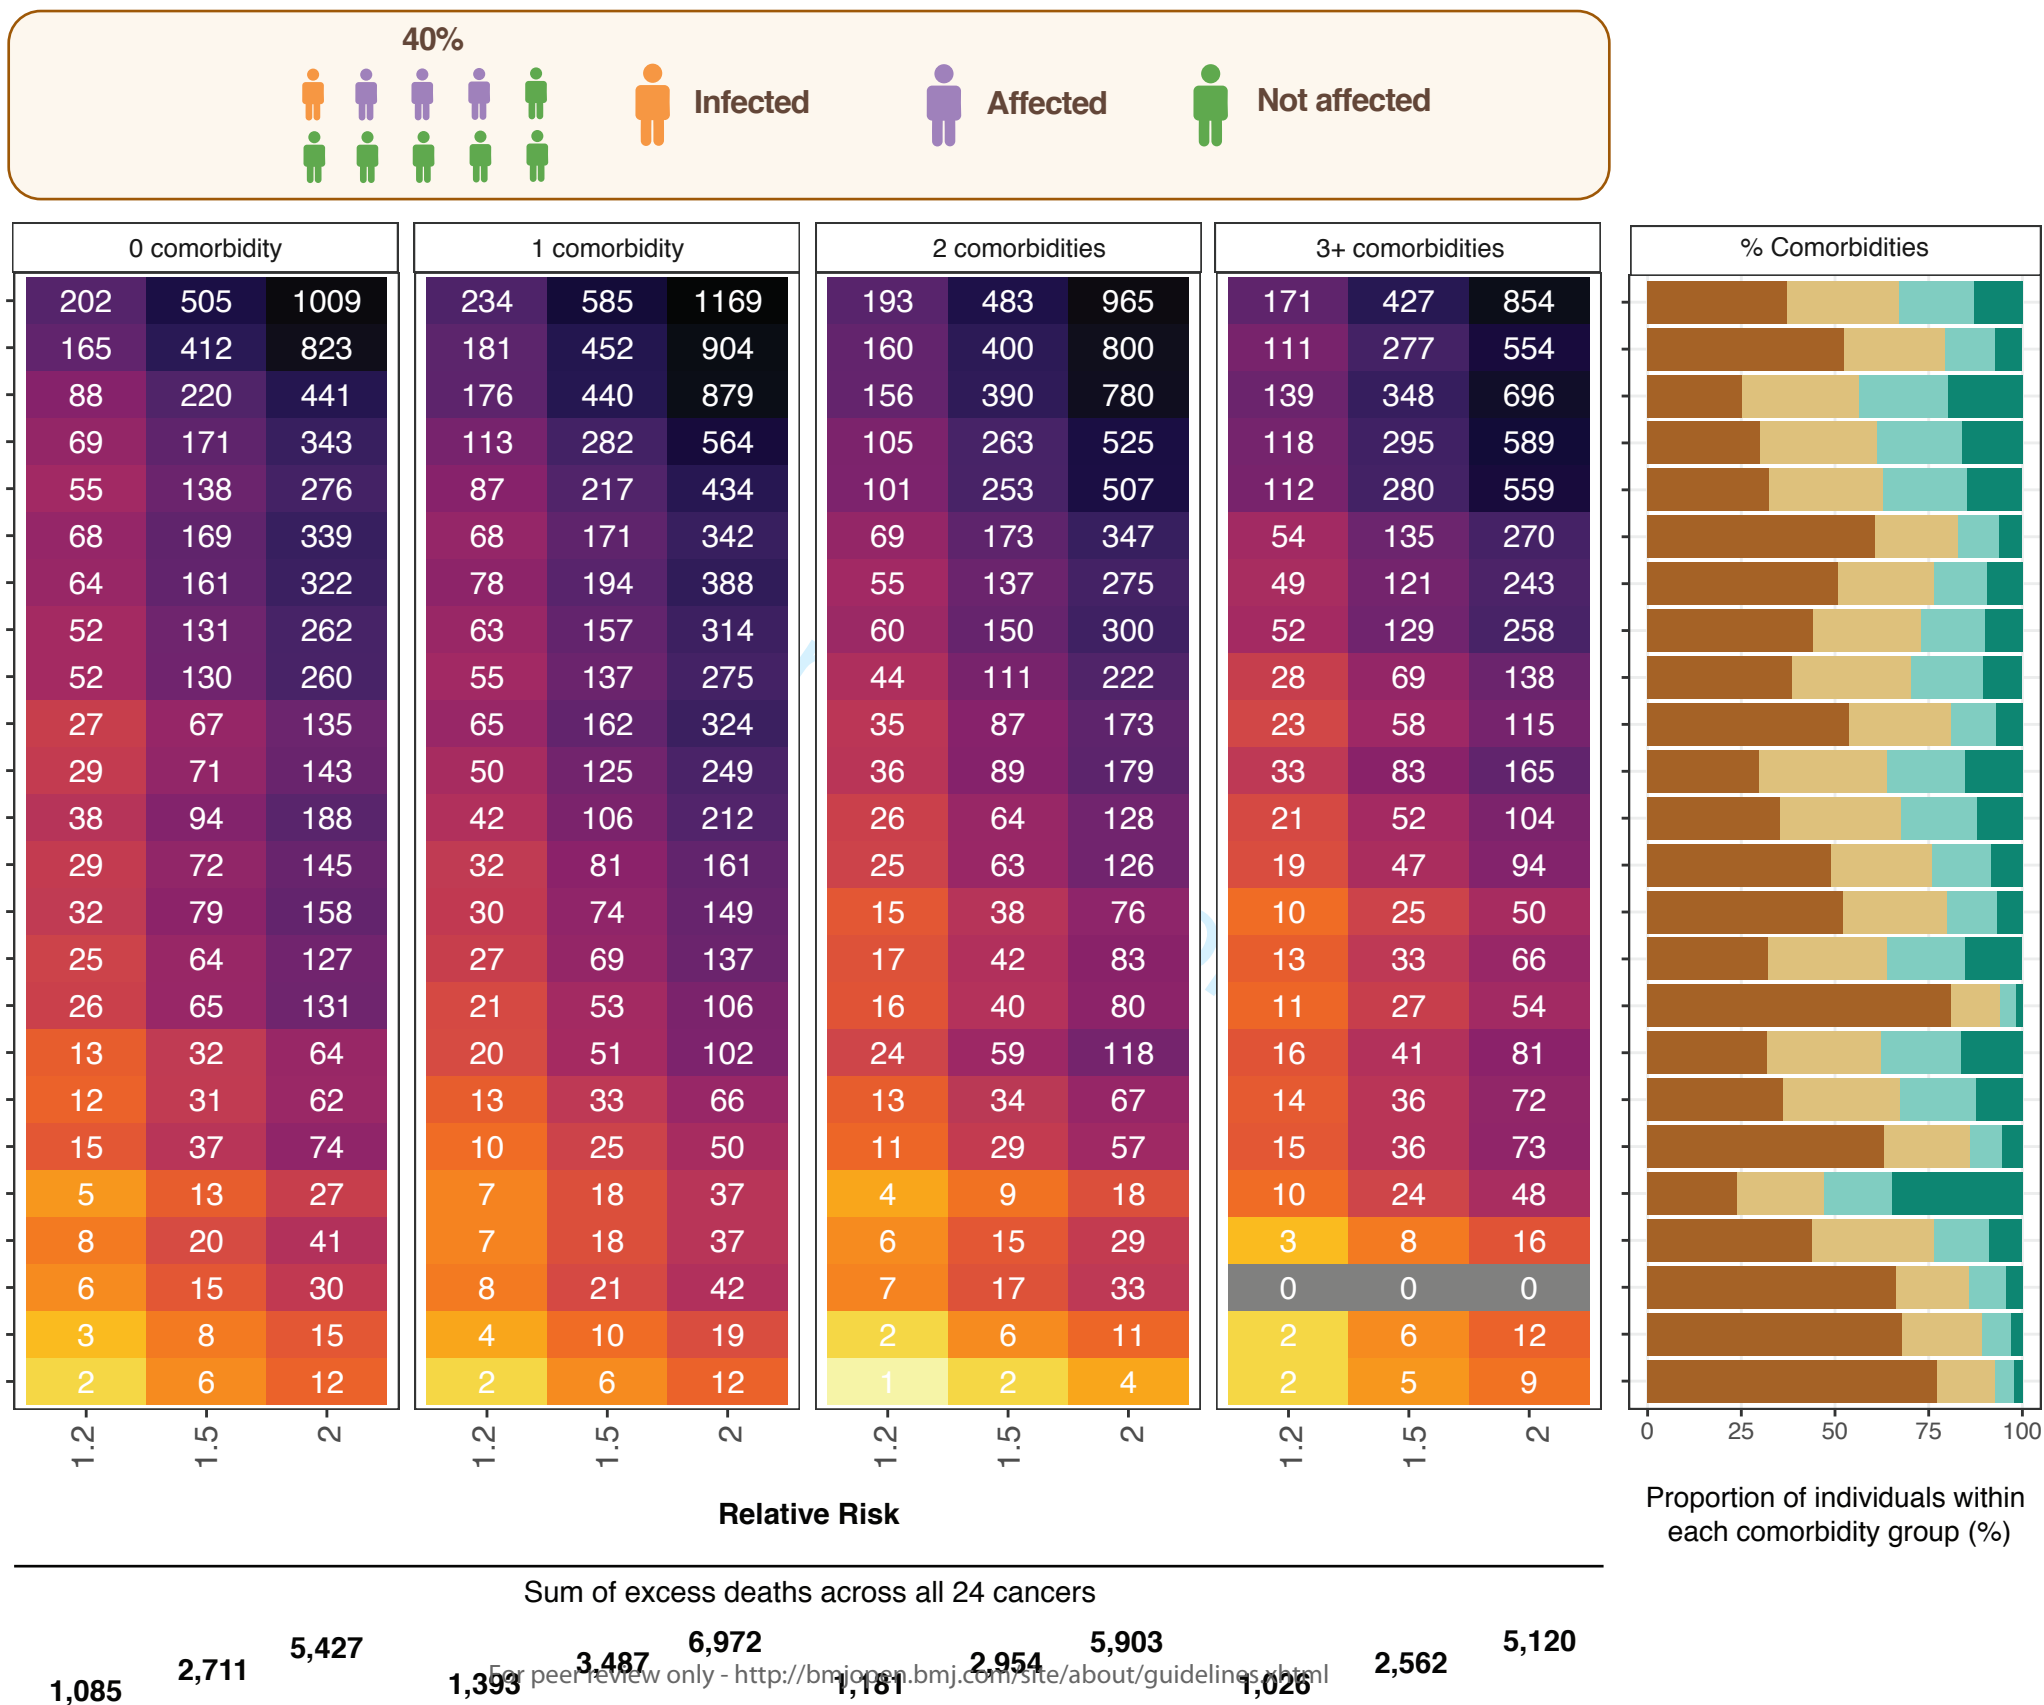



# BMJ Open

## Estimated impact of the Covid-19 pandemic on cancer services and excess 1-year mortality in people with cancer and multimorbidity: near-real-time data on cancer care, cancer deaths and a population-based cohort study

|                               |                                                                                                                                                                                                                                                                                                                                                                                                                                                                                                                                                                                                                                                                                                                                                                                                                                                                                                                                                                                                                                                                                                                                                                                                                                                                                                                                                                                                                                                                                                                                                                                                                                                                                                                                                                                                                                                                                                                                                                                                                                                                                              |
|-------------------------------|----------------------------------------------------------------------------------------------------------------------------------------------------------------------------------------------------------------------------------------------------------------------------------------------------------------------------------------------------------------------------------------------------------------------------------------------------------------------------------------------------------------------------------------------------------------------------------------------------------------------------------------------------------------------------------------------------------------------------------------------------------------------------------------------------------------------------------------------------------------------------------------------------------------------------------------------------------------------------------------------------------------------------------------------------------------------------------------------------------------------------------------------------------------------------------------------------------------------------------------------------------------------------------------------------------------------------------------------------------------------------------------------------------------------------------------------------------------------------------------------------------------------------------------------------------------------------------------------------------------------------------------------------------------------------------------------------------------------------------------------------------------------------------------------------------------------------------------------------------------------------------------------------------------------------------------------------------------------------------------------------------------------------------------------------------------------------------------------|
| Journal:                      | <i>BMJ Open</i>                                                                                                                                                                                                                                                                                                                                                                                                                                                                                                                                                                                                                                                                                                                                                                                                                                                                                                                                                                                                                                                                                                                                                                                                                                                                                                                                                                                                                                                                                                                                                                                                                                                                                                                                                                                                                                                                                                                                                                                                                                                                              |
| Manuscript ID                 | bmjopen-2020-043828.R1                                                                                                                                                                                                                                                                                                                                                                                                                                                                                                                                                                                                                                                                                                                                                                                                                                                                                                                                                                                                                                                                                                                                                                                                                                                                                                                                                                                                                                                                                                                                                                                                                                                                                                                                                                                                                                                                                                                                                                                                                                                                       |
| Article Type:                 | Original research                                                                                                                                                                                                                                                                                                                                                                                                                                                                                                                                                                                                                                                                                                                                                                                                                                                                                                                                                                                                                                                                                                                                                                                                                                                                                                                                                                                                                                                                                                                                                                                                                                                                                                                                                                                                                                                                                                                                                                                                                                                                            |
| Date Submitted by the Author: | 20-Oct-2020                                                                                                                                                                                                                                                                                                                                                                                                                                                                                                                                                                                                                                                                                                                                                                                                                                                                                                                                                                                                                                                                                                                                                                                                                                                                                                                                                                                                                                                                                                                                                                                                                                                                                                                                                                                                                                                                                                                                                                                                                                                                                  |
| Complete List of Authors:     | <p>Lai, Alvina; University College London, Institute of Health Informatics<br/> Pasea, Laura; The Farr Institute of Health Informatics Research, University College ,<br/> Banerjee, Amitava; University College London, Farr Institute of Health Informatics Research<br/> Hall, Geoff; St James's University Teaching Hospital,<br/> Denaxas, S; University College London, Institute of Health Informatics<br/> Chang, Wai Hoong; University College London, Institute of Health Informatics<br/> Katsoulis, M; University College London, Institute of Health Informatics<br/> Williams, Bryan; University College London, Institute of Cardiovascular Science<br/> Pillay, Deenan; University College London, Medicine<br/> Noursadeghi, Mahdad; University College London, 4Division of Infection &amp; Immunity<br/> Linch, David; University College London<br/> Hughes, Derralyynn; Royal Free Hospital and University College Medical School, Lysosomal Storage Disorders Unit, Department of Academic Haematology<br/> Forster, Martin; University College London, Institute of Health Informatics<br/> Turnbull, Clare; Institute of Cancer Research<br/> Fitzpatrick, Natalie; UCL, Epidemiology and Public Health<br/> Boyd, Kathryn; Northern Ireland Cancer Network<br/> Foster, Graham; Barts and The London School of Medicine,<br/> Enver, Tariq; University College London, Cancer Institute<br/> Nafilyan, Vahe; Office for National Statistics<br/> Humberstone, Ben; Office for National Statistics<br/> Neal, Richard; University of Leeds, Leeds Institute of Health Sciences<br/> Cooper, Matt; UCL Partners<br/> Jones, Monica; University of Leeds<br/> Pritchard-Jones, Kathy; University College London, UCL Great Ormond Street Institute of Child Health; University College London Hospitals NHS Foundation Trust, North Central London Cancer Alliance<br/> Sullivan, Richard; Kings Health Partners<br/> Davie, Charlie; UCL Partners<br/> Lawler, Mark; Queen's University belfast, CCRCB<br/> Hemingway, Harry; UCL, Epidemiology and Public Health</p> |

1  
2  
3  
4  
5  
6  
7  
8  
9  
10  
11  
12  
13  
14  
15  
16  
17  
18  
19  
20  
21  
22  
23  
24  
25  
26  
27  
28  
29  
30  
31  
32  
33  
34  
35  
36  
37  
38  
39  
40  
41  
42  
43  
44  
45  
46  
47  
48  
49  
50  
51  
52  
53  
54  
55  
56  
57  
58  
59  
60

|                                   |                                                                         |
|-----------------------------------|-------------------------------------------------------------------------|
| <b>Primary Subject Heading:</b>   | Oncology                                                                |
| <b>Secondary Subject Heading:</b> | Epidemiology, Public health                                             |
| <b>Keywords:</b>                  | COVID-19, ONCOLOGY, Health informatics < BIOTECHNOLOGY & BIOINFORMATICS |
|                                   |                                                                         |

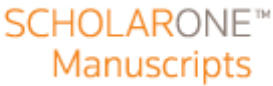



I, the Submitting Author has the right to grant and does grant on behalf of all authors of the Work (as defined in the below author licence), an exclusive licence and/or a non-exclusive licence for contributions from authors who are: i) UK Crown employees; ii) where BMJ has agreed a CC-BY licence shall apply, and/or iii) in accordance with the terms applicable for US Federal Government officers or employees acting as part of their official duties; on a worldwide, perpetual, irrevocable, royalty-free basis to BMJ Publishing Group Ltd ("BMJ") its licensees and where the relevant Journal is co-owned by BMJ to the co-owners of the Journal, to publish the Work in this journal and any other BMJ products and to exploit all rights, as set out in our [licence](#).

The Submitting Author accepts and understands that any supply made under these terms is made by BMJ to the Submitting Author unless you are acting as an employee on behalf of your employer or a postgraduate student of an affiliated institution which is paying any applicable article publishing charge ("APC") for Open Access articles. Where the Submitting Author wishes to make the Work available on an Open Access basis (and intends to pay the relevant APC), the terms of reuse of such Open Access shall be governed by a Creative Commons licence – details of these licences and which [Creative Commons](#) licence will apply to this Work are set out in our licence referred to above.

Other than as permitted in any relevant BMJ Author's Self Archiving Policies, I confirm this Work has not been accepted for publication elsewhere, is not being considered for publication elsewhere and does not duplicate material already published. I confirm all authors consent to publication of this Work and authorise the granting of this licence.

1  
2 1 **Estimated impact of the Covid-19 pandemic on cancer services and excess 1-year mortality**  
3 2 **in people with cancer and multimorbidity: near-real-time data on cancer care, cancer deaths**  
4 3 **and a population-based cohort study**  
5 4

6 5 Alvina G. Lai<sup>§1,2</sup>, Laura Pasea<sup>\*1,2</sup>, Amitava Banerjee<sup>\*1,2,3</sup>, Geoff Hall<sup>\*4,5,6</sup>, Spiros Denaxas<sup>1,2,7,8</sup>, Wai  
7 6 Hoong Chang<sup>1,2</sup>, Michail Katsoulis<sup>1,2</sup>, Bryan Williams<sup>7,9,10</sup>, Deenan Pillay<sup>11</sup>, Mahdad Noursadeghi<sup>11</sup>,  
8 7 David Linch<sup>7,12</sup>, Derralynn Hughes<sup>13,14</sup>, Martin D. Forster<sup>9,13</sup>, Clare Turnbull<sup>15</sup>, Natalie K. Fitzpatrick<sup>1,2</sup>,  
9 8 Kathryn Boyd<sup>16</sup>, Graham R. Foster<sup>17</sup>, Tariq Enver<sup>13</sup>, Vahe Nafilyan<sup>18</sup>, Ben Humberstone<sup>18</sup>, Richard  
10 9 D. Neal<sup>19</sup>, Matt Cooper<sup>4,5</sup>, Monica Jones<sup>4,5</sup>, Kathy Pritchard-Jones<sup>4,20,21,22</sup>, Richard Sullivan<sup>23</sup>, Charlie  
11 10 Davie<sup>4,14,20</sup>, Mark Lawler<sup>§4,24</sup>, Harry Hemingway<sup>§1,2,6</sup>

12 11  
13 12 <sup>1</sup>Institute of Health Informatics, University College London, London, UK

14 13 <sup>2</sup>Health Data Research UK, University College London, London, UK

15 14 <sup>3</sup>Barts Health NHS Trust, The Royal London Hospital, Whitechapel Rd, London, UK

16 15 <sup>4</sup>DATA-CAN, Health Data Research UK hub for cancer hosted by UCLPartners, London, UK

17 16 <sup>5</sup>Leeds Institute of Medical Research, University of Leeds, Leeds, UK

18 17 <sup>6</sup>Leeds Teaching Hospitals NHS Trust, Leeds, UK

19 18 <sup>7</sup>University College London Hospitals NIHR Biomedical Research Centre, London, UK

20 19 <sup>8</sup>The Alan Turing Institute, London, UK

21 20 <sup>9</sup>University College London Hospitals NHS Trust, London, UK

22 21 <sup>10</sup>Institute of Cardiovascular Science, University College London, London, UK

23 22 <sup>11</sup>Division of Infection and Immunity, University College London, London, UK

24 23 <sup>12</sup>Department of Hematology, University College London Cancer Institute, London, UK

25 24 <sup>13</sup>University College London Cancer Institute, London, UK

26 25 <sup>14</sup>Royal Free NHS Foundation Trust, London, UK

27 26 <sup>15</sup>Division of Genetics and Epidemiology, Institute of Cancer Research, London, UK

28 27 <sup>16</sup>Northern Ireland Cancer Network, UK

29 28 <sup>17</sup>Barts Liver Centre, Blizard Institute, Queen Mary University of London, London, UK

30 29 <sup>18</sup>Office for National Statistics, London, UK

31 30 <sup>19</sup>Leeds Institute for Health Sciences, University of Leeds, Leeds, UK

32 31 <sup>20</sup>UCLPartners Academic Health Science Partnership, London UK

33 32 <sup>21</sup>Centre for Cancer Outcomes, University College London Hospitals NHS Foundation Trust, London, UK

34 33 <sup>22</sup>UCL Great Ormond Street Institute for Child Health, University College London, London, UK

35 34 <sup>23</sup>Conflict and Health Research Group, Institute of Cancer Policy, King's College London, London, UK

36 35 <sup>24</sup>Patrick G Johnston Centre for Cancer Research, Queen's University Belfast, UK

37 36  
38 37 § Joint senior authors

39 38 \* Joint second authors

40 39  
41 40 **For correspondence:** Alvina G. Lai ([alvina.lai@ucl.ac.uk](mailto:alvina.lai@ucl.ac.uk))

1  
2 41 **Abstract:**  
3  
4 42

5 43 **Objectives:** To estimate the impact of the covid-19 pandemic on cancer care services and overall  
6  
7 44 (direct and indirect) excess deaths in people with cancer.  
8  
9 45

10 46 **Methods:** We employed near real-time weekly data on cancer care to determine the adverse effect  
11 47 of the pandemic on cancer services. We also used these data, together with national death  
12 48 registrations until June 2020 to model deaths, in excess of background (pre-covid-19) mortality, in  
13 49 people with cancer. Background mortality risks for 24 cancers with and without covid-19-relevant  
14 50 comorbidities were obtained from population-based primary care cohort (Clinical Practice Research  
15 51 Datalink) on 3,862,012 adults in England.  
16  
17  
18  
19 52

20  
21 53 **Results:** Declines in urgent referrals (median = -70.4%) and chemotherapy attendances (median =  
22 54 -41.5%) to a nadir (lowest point) in the pandemic were observed. By 31<sup>st</sup> May, these declines have  
23 55 only partially recovered; urgent referrals (median = -44.5%) and chemotherapy attendances (median  
24 56 = -31.2%). There were short-term excess death registrations for cancer (without covid-19), with peak  
25 57 relative risk (RR) of 1.17 at week ending 3<sup>rd</sup> April. The peak RR for all-cause deaths was 2.1 from  
26 58 week ending 17<sup>th</sup> April. Based on these findings and recent literature, we modelled 40% and 80% of  
27 59 cancer patients being affected long-term by the pandemic. At 40% affected, we estimated 1-year  
28 60 total (direct and indirect) excess deaths in people with cancer as between 7,165 and 17,910, using  
29 61 RR of 1.2 and 1.5 respectively, where 78% of excess deaths occur in patients with  $\geq 1$  comorbidity.  
30  
31  
32  
33  
34  
35 62

36 63 **Conclusions:** Dramatic reductions were detected in the demand for, and supply of, cancer services  
37 64 which have not fully recovered with lockdown easing. These may contribute, over a 1-year time  
38 65 horizon, to substantial excess mortality among people with cancer and multimorbidity. It is urgent to  
39 66 understand how the recovery of general practitioner, oncology and other hospital services might best  
40 67 mitigate these long-term excess mortality risks.  
41  
42  
43  
44  
45 68  
46 69  
47  
48  
49  
50  
51  
52  
53  
54  
55  
56  
57  
58  
59  
60

1  
2 70 ***Strengths and limitations of this study***

- 3 71 • This is the first study that used hospital data and a predictive model to dissect and quantify the  
4 adverse impact on mortality of the pandemic on patients with cancer and multimorbidity.  
5 72  
6 73 • This study used the breadth of longitudinal information in primary care records from the Clinical  
7 Practice Research Datalink to generate background (pre-COVID-19) mortality estimates for  
8 patients with cancer.  
9 74  
10 75 • This study generated 1-year mortality estimates for 24 cancer types and evaluated the extent by  
11 which multimorbidity influences mortality risk in patients with cancer. We considered 15  
12 comorbidity clusters, which include 40 non-malignant comorbidities defined by the Public Health  
13 England as associated with severe and fatal covid-19 infection.  
14 76  
15 77 • This study modelled excess deaths using information on background mortality risk and plausible  
16 relative risk estimates obtained from the Office for National Statistics and other published studies.  
17 78  
18 79 • A limitation of this study is the use of primary care health records which may have missed cases  
19 of cancer resulting in more conservative estimations of excess deaths.  
20 80  
21 81  
22 82  
23 83  
24 84

## **Introduction:**

The covid-19 pandemic may cause additional (excess) deaths due both to the direct effects of infection and the indirect effects that result from the repurposing of health services designed to address the pandemic[1]. People with cancer are at increased risk of contracting and dying from SARS-CoV-2 infection[2,3]. Optimal cancer care must balance protecting patients from SARS-CoV-2 infection, with the need for continued access to early diagnosis and delivery of optimal treatment[4,5]. Professional cancer associations internationally have recommended reducing systemic anti-cancer treatment, surgery and risk-adapted radiotherapy[6]. In June 2020, the NHS released statistics for April 2020, indicating that referrals to a consultant for urgent diagnosis of cancer had fallen by 60%[7]. Some cancer surgical procedures have been postponed and cancer screening programmes paused[8–13].

However, covid-19-induced healthcare service reconfiguration and recovery have, to date, not been informed by near real-time hospital data quantifying the extent of disruption for cancer patients resulting from this service reconfiguration, nor its impact on excess deaths in people with cancer. A previous study has employed literature-based estimates to model the impact of potential diagnostic delays in colorectal cancer during the covid-19 pandemic[14,15]. Short-term (30 days) death in people with cancer and covid-19 is importantly driven by (treatable) comorbidities such as hypertension and cardiovascular disease[16]. Public Health England (PHE) have identified patients with these and a wide range of other non-malignant conditions as at greater risk of developing severe illness from SARS-CoV-2 exposure[17,18], while multimorbidity in cancer is an increasing clinical concern[19,20]. For general practitioners and oncologists, evidence is required on the pan-cancer estimation of mortality risks according to type and number of comorbid conditions. Such evidence may inform individual decisions about physical isolation and shielding, as well as the need to ensure that patients access specialist cancer care and seek preventive care for non-malignant comorbidities.

Our objectives were: (i) to quantify changes in cancer care, reporting near-real-time weekly data (to June 2020) for urgent referral (for early diagnosis of cancer) and chemotherapy attendance (for treatment of cancer); (ii) to quantify short-term direct and indirect excess deaths using near real-time weekly death registrations from the Office for National Statistics (ONS); (iii) to estimate the number of annual direct (covid-19) and indirect excess deaths using population-based 1-year Kaplan-Meier mortality estimates for 24 cancer types and (iv) to determine the extent by which multimorbidity contributes to these excess deaths.

## **Methods:**

### ***Weekly near real-time hospital data***

To estimate the extent to which changes in cancer services during different phases of the pandemic (pre-lockdown, lockdown, post lockdown easing) have impacted on cancer care delivery, we sought weekly information for urgent cancer referrals for early diagnosis ('two-week-wait' [2WW]), an indicator of both patient demand and health service supply i.e., how well the service is ensuring that individuals with suspicious symptoms are rapidly prioritised to the diagnostic cancer pathway) and chemotherapy attendances (an indicator of supply and a proxy for possible adverse effects of the pandemic on the cancer treatment pathway). We employed the UK's Health Data Research Hub for Cancer (DATA-CAN) [21] to approach eight hospital trusts (in Leeds, London and Northern Ireland) and sought data from January 2019 to June 2020 to control for seasonal changes. Each hospital trust rapidly provided the requested data and permission to share these data in the public domain. We estimated the % change in weekly activity compared to the mean activity in 2019.

### ***Weekly near real-time death registration data***

To estimate direct (among those infected) and indirect impact of the covid-19 pandemic on deaths, we sought weekly counts of deaths in England and Wales from the Office for National Statistics (ONS), with causes classified by the ONS as covid-19 deaths, non-covid-19 deaths excluding cancer and cancer deaths.

### ***Study population: primary care population-based cohort***

To estimate pre-covid-19 incidence and mortality in individuals with cancer, we used population-based electronic health records in England from primary care data from the Clinical Practice Research Datalink (CPRD) linked to the ONS death registration. We used this primary care data source because of the extensive information on comorbidities (which may be lacking in cancer registry data). The study population was 3,862,012 adults aged  $\geq 30$  years, registered with a general practice from 1 January 1997 to 1 January 2017, with at least 1 year of follow-up data. CPRD data are representative of the English population in terms of age, sex, mortality and ethnicity[22–24], with extensive evidence of validity[25]. This study was performed as part of the CALIBER programme (<https://www.ucl.ac.uk/health-informatics/caliber>). CALIBER is an open-access research resource consisting of information, tools and phenotyping algorithms available through the CALIBER Portal (<https://caliberresearch.org/portal>)[26,27]. The study was approved by the MHRA (UK) Independent Scientific Advisory Committee (20\_074R2), under Section 251 (NHS Social Care Act 2006).

### ***Open-access definitions of disease using electronic health records***

We defined non-fatal incident cases (as alive for at least 30 days following cancer diagnosis) and prevalent cases of cancer across 24 primary cancer sites according to previously validated CALIBER



1  
2 160 electronic health record phenotypes. Incident cancers were defined as new cancer diagnoses after  
3  
4 161 the study entry into CPRD (baseline). Prevalent cancers were defined as cancer diagnoses recorded  
5 162 at any time prior to baseline. The cancers included: biliary tract, bladder, bone, brain, breast, cervix,  
6  
7 163 colorectal, Hodgkin's lymphoma, kidney, leukaemia, liver, lung, melanoma, multiple myeloma, non-  
8  
9 164 Hodgkin's lymphoma, oesophagus, oropharynx, ovary, pancreas, prostate, stomach, testis, thyroid  
10 165 and uterus[28]. Phenotype definitions of cancers and covid-19-relevant comorbidities are available  
11 166 at <https://caliberresearch.org/portal> and have previously been validated[29–32]. Phenotypes were  
12  
13 167 generated from hospital and primary care information recorded in primary care, using Read clinical  
14  
15 168 terminology (version 2).

### 16 169 17 18 170 **Comorbidities relevant to covid-19**

19 171 We examined 15 comorbidity clusters, which include 40 non-malignant comorbidities defined by PHE  
20  
21 172 as associated with severe and fatal covid-19 infection[17,18]. We separately estimated the  
22  
23 173 proportion of patients with each comorbidity at study entry (prevalent cancers), and at the date of  
24 174 the first diagnosis of incident cancer. The PHE list included chronic respiratory disease, chronic heart  
25  
26 175 disease, immunocompromised individuals, HIV, use of corticosteroids, obesity, diabetes, chronic  
27 176 kidney disease, chronic liver disease, chronic neurological disorders and splenic disorders. A full list  
28  
29 177 of the conditions we examined, and their definitions is provided in Supplementary Methods.

### 30 178 31 32 179 **Estimating incidence rates and 1-year mortality**

33 180 We estimated incidence rates per 100,000 person-years and 1-year mortality in our study population.  
34  
35 181 Estimated incidence rates for the number of new cancers by cancer site were compared with those  
36  
37 182 for the UK from the International Agency for Research on Cancer (IARC) and were found to be  
38 183 representative. We estimated baseline 1-year mortality risk following cancer diagnosis for both  
39  
40 184 incident and prevalent cancers using Kaplan-Meier analyses stratified by cancer sites and number  
41 185 of (non-cancer) comorbid conditions (0, 1, 2 and 3+). We used the most recent 5 years of data (2012-  
42  
43 186 2016) to estimate 1-year mortality.

### 44 187 45 46 188 **Estimating 1-year direct excess deaths**

47 189 Excess deaths were estimated by applying relative risks (RRs) to the background 1-year mortality  
48  
49 190 risk. Direct excess deaths (due to or with covid-19) were modelled using the range of relative risks  
50  
51 191 (1.2, 1.5 and 2.0) previously reported in studies of cancer and covid-19 deaths.[3,33] We applied  
52 192 these RRs to 10% of the population (the directly "infected"), based on recent SARS CoV-2  
53  
54 193 seroprevalence estimates in the UK[34,35] and other countries[36,37]. Although the infection rate  
55  
56 194 will change depending on the phase of the pandemic, we assumed an infection rate over 1 year in  
57 195 line with the first wave of the pandemic.  
58  
59 196  
60 197

1  
2 198  
3  
4 199  
5 200  
6  
7 201  
8 202  
9  
10 203  
11 204  
12  
13 205  
14  
15 206  
16 207  
17  
18 208  
19 209  
20  
21 210  
22  
23 211  
24 212  
25  
26 213  
27 214  
28  
29 215  
30 216  
31  
32  
33  
34  
35  
36  
37  
38  
39  
40  
41  
42  
43  
44  
45  
46  
47  
48  
49  
50  
51  
52  
53  
54  
55  
56  
57  
58  
59  
60

### ***Estimating 1-year total (direct and indirect) excess deaths***

Indirect excess deaths (due to pandemic-induced health service reconfiguration) were estimated by applying RRs for excess cancer deaths observed using ONS data, by taking the number of weekly cancer deaths from January 2020 divided by the weekly average over the last 5 years. We assumed that the effects of service change may not translate to an immediate increase in excess deaths. We have applied the RR of 1.2, 1.5 and 2 to 40% (10% infected, 30% affected) and 80% (10% infected, 70% affected) of the population and modelled excess deaths over a 12-month period to capture medium term effects. We chose this range of indirectly “affected” population based on our real-time estimates of the degree of perturbation in cancer care during the pandemic and patient reports that clinical care had been cancelled during the pandemic for 53%-70% of patients with cancer or other conditions[38].

To project the study estimates of excess deaths to the whole English population, we employed the 2018 population estimate, where the number of deaths is scaled up to a population of 35,407,313 individuals aged 30 and above[39]. All analyses were performed using R (version 3.4.3).

## Results

### ***Near real-time data on cancer care***

Evaluating data from 291,792 people with suspected cancer and 150,636 patients with cancer attending for chemotherapy from January 2019 to June 2020, we initially characterised the pre-pandemic basal level of activity (2019 average), including seasonal variations (Figure 1). Using the date of the 50<sup>th</sup> patient diagnosed with covid-19 as the starting point of the pandemic, we observed that urgent referrals fell by 70.4% (range: -68.7% to -84.3%), while chemotherapy attendances declined by 41.5% (range: -26.3% to -63.4%) (Figure 1). To highlight these adverse impacts, we provided these data to Chief Medical Officers in all 4 nations of the United Kingdom and the National Director for Cancer (England). We have also continued to provide regular updates of this intelligence to the Scientific Advisory Group for Emergencies. Since the NHS letter on 29 April 2020 re-starting cancer and other services[40], and since easing of lockdown (11 May 2020), there has been evidence of recovery for the urgent two-week-wait referrals (-55.4% to -40.0%; median = -44.5%), and chemotherapy attendances (-37.1% to 3.9%; median = -31.2%) (Figure 1).

### ***Near real-time data on cancer, covid-19 and other deaths***

There were 1,307 excess cancer deaths from 13<sup>th</sup> March to 15<sup>th</sup> May 2020 compared to the 5-year average based on weekly registration of deaths for England and Wales (Figure 2A). We found an excess in cancer deaths with a peak in the week ending 3<sup>rd</sup> April 2020 with a relative risk (RR) of 1.17 (Figure 2B). There were 41,105 covid-19 deaths up until 15<sup>th</sup> May 2020. For non-covid-19 deaths (excluding cancers), we found that the peak occurred with a RR of 1.37 on 24<sup>th</sup> April 2020. The peak RR for all-cause deaths was 2.1, from week of 17<sup>th</sup> April 2020.

### ***Estimations on direct excess deaths by cancer site over 1-year***

We estimated direct excess covid-19 deaths based on a SARS CoV-2 infection rate of 10% and background 1-year mortality risks (Figure 3A). For both incident and prevalent cancers combined, we estimated 1,790, 4,479 and 8,957 direct excess deaths at RR of 1.2, 1.5 and 2.0 respectively (Figure 3B). Incidence rates for 24 cancer types were shown in Figure S1. Figures S2 and S3 show the separate direct excess death estimates for incident and prevalent cancers.

### ***Estimations of total (direct and indirect) excess deaths by cancer site over a 1-year***

When applying RRs of 1.2 or 1.5 to 40% (10% infected, 30% affected) of the population of people with cancer (both incident and prevalent cancers), we estimated 7,165 and 17,910 total excess deaths respectively (Figure 3B). When applying these RRs to 80% (10% infected, 70% affected) of the population of people with cancer, we estimated 14,326 and 35,817 total excess deaths respectively (Figure 3B). Figures S2 and S3 show the separate total excess death estimates for incident and prevalent cancers.

1

2 255

3

4 256 **Comorbidities relevant to covid-19 risk: prevalence and association with 1-year mortality**

5 257 Comorbidities were common in people with incident cancer: hypertension (83,313 [41.9%]),  
6 258 cardiovascular disease (55,742 [28.0%]), chronic kidney disease (31,935 [16.0%]), obesity (19,589  
8 259 [9.8%]), type 2 diabetes (18,957 [9.5%]) and COPD (18,373 [9.2%]) (Figure S4). Similar patterns  
9 were seen in prevalent cancers (Figure S5). Multimorbidity ( $\geq 1$  comorbidity) was associated with a  
10 260 higher 1-year mortality (Figure S6 for incident cancers; Figure S7 for prevalent cancers). For  
11 261 example, for incident colorectal cancer, 1-year mortality for 0, 1, 2 and 3+ comorbidities, was 13.8%,  
13 262 17.3%, 23.6% and 30.2% respectively (Figure S6).

16 264

17

18 265 **Estimations of total (direct and indirect) excess deaths by cancer site and number of**  
19 266 **comorbidities over a 1-year period**

20  
21 267 To ascertain the influence of multimorbidity on total excess deaths, we provide estimates based on  
22 268 40% (10% infected, 30% affected). For both incident and prevalent cancers, 78% of the predicted  
24 269 excess deaths occur in people with 1+ comorbidity. For example, at RR of 1.2, there are 5,622  
25 270 excess deaths in those with 1+comorbidity compared to 1,567 in those with no comorbidities (total  
27 271 7,189) (Figure 4). Even though the size of patient group in 0, 1, 2 and 3+ comorbidities declines  
28 (49.8%, 24.7%, 15.0% and 10.6% respectively) the absolute numbers of excess deaths in each  
29 272 comorbidity group are similar, suggesting that patients with comorbidities contribute to a large  
30 273 proportion of excess deaths compared to those without non-cancer comorbidities. For example, at  
32 274 RR of 1.5, the numbers of total excess deaths for both incident and prevalent cancers were 3,922,  
33 275 4,993, 4,526 and 4,542 in individuals with 0, 1, 2 and 3+ non-cancer comorbidities respectively  
35 276 (Figure 4). The findings for incident and prevalent cases are presented separately in Figure S8 and  
37 277 Figure S9.

38 278

39

40 279  
41 280 We share the underlying study estimates from this paper (online data supplement) and provide an  
42 281 open-access tool for researchers to interact with the model  
43 282 ([https://pasea.shinyapps.io/cancer\\_covid\\_app/](https://pasea.shinyapps.io/cancer_covid_app/)).

46 283

47

48 284

49

50

51

52

53

54

55

56

57

58

59

60

1  
2 285 **Discussion:**

3  
4 286  
5 287 ***Statement of principal findings***

6  
7 288 To our knowledge, this is the first study with near real-time evidence of covid-19's negative impact  
8 289 on cancer services at different phases of the pandemic, its potential to lead to significant excess  
9  
10 290 deaths in people with cancer and the substantial role that comorbidities may play in these excess  
11 291 deaths.

12  
13 292  
14  
15 293 ***Changes in cancer care at different phases of pandemic:*** We delineate both the nadir and the  
16 294 incomplete recovery of UK cancer services that have resulted from the covid-19 pandemic. We  
17  
18 295 observed profound declines in urgent two-week wait (2WW) referrals for early cancer diagnosis,  
19 296 which have not returned to pre-covid-19 levels. These may reflect patients' deciding not to seek care  
20  
21 297 due to the perceived risk of infection, but may also be in part due to difficulty in securing appointments  
22  
23 298 due to reprioritised health systems[19]. An unintended consequence of this reprioritisation may be  
24 299 excess deaths due to delayed diagnoses, increased emergency presentations, more advanced  
25  
26 300 stage at presentation, and changes in care pathways that adversely affect outcomes. We also  
27 301 observed large declines in chemotherapy attendance, presumably reflecting capacity/resources  
28  
29 302 being redirected to care for infected patients (e.g., to intensive care) and the desire of clinicians and  
30  
31 303 patients to minimise the risks of covid-19 for susceptible cancer patients [10].

32 304  
33  
34 305 ***Direct (covid-19) excess deaths:*** It is important to note that our model estimates deaths additional to  
35 306 those that would be expected (without covid-19) in people with cancer. At a RR of 2, we estimate  
36  
37 307 about 9,000 direct covid-19 excess deaths in 1 year in people with cancer but acknowledge there is  
38  
39 308 uncertainty in this estimate. There is increasing concern that those discharged from hospital with  
40 309 covid-19 may have long term, (including fatal) sequelae.

41  
42 310  
43 311 ***Total (direct and indirect) excess deaths:*** Based on our observations regarding the adverse effects  
44  
45 312 of cancer service reprioritization, we consider a proportion affected by the pandemic of 40%  
46 313 plausible, if perhaps somewhat conservative. But, given that adverse effects could be more profound  
47  
48 314 (our 2WW referrals data, for example, would suggest this), we present excess deaths for a range of  
49  
50 315 both 40% and 80%. Adding credibility to our estimates, in a survey in April 2020 of 17,000 UK adults,  
51 316 56% of cancer patients reported that the NHS had cancelled their treatment[38] Overall, we  
52  
53 317 conservatively estimate, at RR of 1.5, that 17,910 total excess deaths for 1 year will occur in patients  
54 318 with cancer, but this could rise to 35,817. We note the degree of uncertainty in the observed RR at  
55  
56 319 different points in the pandemic. Patients affected by changes in cancer services in March–June  
57  
58 320 2020 may not necessarily directly contribute to an increase in excess indirect deaths in these four  
59 321 months, as the effects on health and mortality outcomes are more likely to occur in a longer time  
60  
322 frame.

1  
2 323  
3  
4 324 ***Importance of multimorbidity:*** We demonstrate that the majority (78%) of excess deaths in people  
5 325 with cancer during the covid-19 pandemic occur in people with at least 1 comorbidity. While many  
6  
7 326 of these comorbidities are treatable, services for these conditions have also been affected by the  
8  
9 327 pandemic. For example, 65% of patients with hypertension and 70% of patients with diabetes  
10 328 reported that the NHS had recently cancelled their care, as captured in the same April 2020 survey  
11 329 noted above[38]. Importantly, the pandemic prompts new questions about which cancer patients are  
12  
13 330 most vulnerable and how best to mitigate an individual's personal risk.

14  
15 331

### 16 332 ***Strengths of this study***

17  
18 333 There are three major strengths of this study. First, the acquisition and deployment of near real-time  
19 334 data to signal the significant adverse impact of the covid-19 pandemic on cancer services and how  
20  
21 335 this has profound implications for cancer diagnostic and treatment pathways. These data were also  
22  
23 336 used to inform and enhance our existing model that estimates excess mortality due to the pandemic.  
24 337 Second, we provide a pan-cancer comorbidity atlas using a population-based 3.8million primary care  
25  
26 338 cohort to underpin estimates of the additional adverse effect of multimorbidity in cancer patients;  
27 339 cancer registry data tend to lack this more comprehensive information. Third, we provide separate  
28  
29 340 estimates of excess deaths for prevalent cancers and incident (newly diagnosed) cancers, because  
30  
31 341 these represent different patterns of risk, treatment priorities, and roles of general practitioner and  
32 342 oncologist.

33  
34 343

### 35 344 ***Weaknesses of this study***

36  
37 345 Our model has important limitations. First, there is a lack in the literature of studies on clinical cohorts  
38 346 of cancer patients investigating all-cause mortality rates in those with and without infection; such  
39  
40 347 studies are needed in order to obtain better estimates of the direct effects of the pandemic. Second,  
41  
42 348 the primary care health records we used may have missed some cases of cancer and thus  
43 349 underestimated incidence[41]. If so, our estimates of excess deaths may be conservative. The NHS  
44  
45 350 has national linked hospital admissions and cancer registration data with information on stage and  
46 351 details of surgical, chemotherapeutic and radiotherapy treatment of cancer. However, information  
47  
48 352 governance for such data can take months to secure, making data-enabled research and time-  
49  
50 353 sensitive responsive service improvement difficult. Third, we did not have access to data on children.  
51 354 Fourth, we only have access to empirical cancer service change data from eight hospitals in the UK.  
52  
53 355 Whilst the data may be a representative sample of the UK population, and patterns of decline in  
54 356 service change is corroborated in another study[42], more widespread access to other trusts may  
55  
56 357 be beneficial to ascertain national and regional effects.

57 358

### 58 59 359 ***Implications for clinicians and policymakers***

60

1  
2 360 Our study may inform decision-making at three levels. First, from a healthcare policy and healthcare  
3 361 implementation perspective, it is clear that the NHS cannot simply be ‘switched on’ again at full  
4 362 capacity for hospital or primary care services as there will be a significant backlog of untreated  
5 363 patients, with waiting lists predicted to expand to 10 million patients. Data published on June 13<sup>th</sup>  
6 364 2020 indicate ~100,000 “missing” cancer referrals in April 2020 alone[7]. More granular weekly  
7 365 intelligence from the centres contributing data to this study suggests that this negative impact will  
8 366 continue for at least six to nine months, placing many more patients at risk.  
9  
10  
11  
12

13 367  
14  
15 368 Second, there are currently no accessible national systems available for near real-time data on care  
16 369 and outcomes of cancer patients. Our study suggests that we should expand our near real-time data  
17 370 approach across the UK to collect actionable information on (i) death certification – in particular  
18 371 distinguishing the contribution of cancer, comorbid conditions and covid-19 to death; (ii) cancer  
19 372 health services activity data, to monitor how changes at each phase of the pandemic (including  
20 373 clearing backlogs for under-referral, under-diagnosis and under-treatment) might influence future  
21 374 health outcomes and (iii) treatment services data for non-malignant comorbidities of cancer patients,  
22 375 such as cardiovascular disease, diabetes and hypertension.  
23  
24  
25  
26  
27  
28

29 377 Third, with knowledge of mortality risk based on type of cancer, age and comorbidities that we  
30 378 provide in an online format ([https://pasea.shinyapps.io/cancer\\_covid\\_app/](https://pasea.shinyapps.io/cancer_covid_app/)), supplemented with local  
31 379 knowledge of health service resilience, we propose that weekly indicators and warnings for  
32 380 vulnerable cancer patients with multimorbidity could be provided. Using this intelligence, treatment  
33 381 prioritization as we resume cancer services could be enhanced by patient-specific risk/benefit  
34 382 assessments which include multimorbidity, particularly in situations where treatment provision  
35 383 outweighs non-treatment/safety issues related to covid-19[19].  
36  
37  
38  
39  
40  
41

#### 42 385 ***Unanswered questions and future research***

43 386 There are important areas for further research. First, there is a need for long-term (1 to 5 years)  
44 387 monitoring of the extent to which cancer patients experience excess mortality due to the pandemic.  
45 388 We chose a 1-year time horizon, because the adverse consequences on health are likely to extend  
46 389 beyond the initial wave of the pandemic. But its impact on excess mortality in patients with cancer,  
47 390 particularly those whose diagnosis/treatment is delayed, may take years to understand. The specific  
48 391 impact of paused cancer screening, particularly for breast and colorectal cancer may be profound.  
49 392 The social and psychological consequences of physical distancing on mortality may also be  
50 393 particularly important in cancer[43,44], while international studies across 75 countries signpost how  
51 394 unemployment negatively impacts mortality in cancer patients[45]. Hence, the socio-economic  
52 395 effects of the current pandemic are likely to last for a considerable period beyond one year[46]. As  
53 396 new empirical data become available on health service, social/psychological and economic changes,  
54  
55  
56  
57  
58  
59  
60

1  
2 397 our model can better specify the proportion and type of cancer patients thus affected and look to  
3  
4 398 develop appropriate mitigation strategies.

5 399

6  
7 400 **Conclusion**

8 401 We mobilised usually inaccessible near real-time hospital data to quantify the immediate adverse  
9  
10 402 impacts of the covid-19 pandemic on cancer services, on people who may demonstrate symptoms  
11 403 of cancer and on patients who are being treated for cancer. The marked reductions observed in the  
12  
13 404 demand for, and supply of, cancer services have only partially recovered with lockdown easing.  
14  
15 405 Such perturbations in cancer care may contribute, over a 1-year time horizon, to substantial excess  
16 406 mortality among people with cancer and multimorbidity. There is an urgent need to better understand  
17  
18 407 and mitigate these excess mortality risks, some of which may be revealed only over the longer term.

19 408

20

21 409

22 410

23

24

25

26

27

28

29

30

31

32

33

34

35

36

37

38

39

40

41

42

43

44

45

46

47

48

49

50

51

52

53

54

55

56

57

58

59

60



1  
2 411 **Contributorship statement:**

3 412 Research question: AGL, HH

4 413 Funding: AGL, AB, ML, HH

5 414 Study design and analysis plan: AGL, LP, AB, MK, WHC, HH

6 415 Preparation of data, including electronic health record phenotyping in the CALIBER portal: AGL, LP,  
7 416 SD

8 417 Provision of weekly hospital data: GH, KPJ, MDF, DH, ML, KB, CD

9 418 Statistical analysis: AGL, LP, WHC, MK

10 419 Drafting initial versions of manuscript: AGL, ML, HH

11 420 Drafting final versions of manuscript: AGL, GH, CD, ML, HH,

12 421 Critical review of early and final versions of manuscript: AGL, LP, AB, GH, SD, WHC, MK, BW, DP,  
13 422 MN, DL, DH, MDF, CT, NKF, KB, GRF, TE, VN, BH, RDN, MC, MJ, KPJ, RS, CD, ML, HH

14 423  
15 424 **Declaration of interests:**

16 425 ML has received honoraria from Pfizer, EMD Serono and Roche for presentations unrelated to this  
17 426 research. ML has received an unrestricted educational grant from Pfizer for research unrelated to  
18 427 the research presented in this paper. AB has received research funding from AstraZeneca. MDF has  
19 428 received research funding from AstraZeneca, Boehringer Ingelheim, Merck and MSD and honoraria  
20 429 from Achilles, AstraZeneca, Bayer, Boehringer Ingelheim, Bristol-Meyers Squibb, Celgene,  
21 430 Guardant Health, Merck, MSD, Nanobiotix, Novartis, Pharmamar, Roche and Takeda for advisory  
22 431 roles or presentations unrelated to this research. GRF receives funding from companies that  
23 432 manufacture drugs for hepatitis C virus (AbbVie, Gilead, MSD) and consult for GSK, Arbutus and  
24 433 Shionogi in areas unrelated to this research.

25 434  
26 435 **Acknowledgments:**

27 436 We thank Tony Hagger, Shiva Thapa, Mohammed Emran, Cara Anderson, Louise Herron, Joy  
28 437 Beaumont, Maurice Loughrey, Philip Melling and Lee Cogger for their help on collating data on  
29 438 urgent cancer referrals and chemotherapy attendances. We thank the HDR UK DATA-CAN Patient  
30 439 and Public Involvement and Engagement panel for critical feedback on the manuscript. We thank  
31 440 Charles Swanton for his valuable comments on the manuscript. This study is based in part on data  
32 441 from the Clinical Practice Research Datalink obtained under licence from the UK Medicines and  
33 442 Healthcare products Regulatory Agency. The data is provided by patients and collected by the NHS  
34 443 as part of their care and support. Mortality data are from the Office for National Statistics (ONS).

35 444  
36 445 **Funding statement:**

37 446 We acknowledge Health Data Research UK (HDR UK) support for the HDR UK substantive sites  
38 447 involved in this research (HDR London, HDR Wales and Northern Ireland) and DATA-CAN. DATA-  
39 448 CAN (MC\_PC\_19006) is part of the Digital Innovation Hub Programme, delivered by HDR UK and

1  
2 449 funded by UK Research and Innovation through the government's Industrial Strategy Challenge  
3  
4 450 Fund. AGL is supported by funding from the Wellcome Trust (204841/Z/16/Z), National Institute for  
5 451 Health Research (NIHR) University College London Hospitals Biomedical Research Centre  
6  
7 452 (BRC714/HI/RW/101440), NIHR Great Ormond Street Hospital Biomedical Research Centre  
8 453 (19RX02) and the Health Data Research UK Better Care Catalyst Award. AB is supported by  
9  
10 454 research funding from NIHR, British Medical Association, Astra-Zeneca and UK Research and  
11 455 Innovation. KPJ is supported by the NIHR Great Ormond Street Hospital Biomedical Research  
12  
13 456 Centre. CD and KPJ is funded by UCLPartners. HH is an NIHR Senior Investigator and is funded by  
14  
15 457 the NIHR University College London Hospitals Biomedical Research Centre, supported by Health  
16 458 Data Research UK (grant No. LOND1), which is funded by the UK Medical Research Council,  
17  
18 459 Engineering and Physical Sciences Research Council, Economic and Social Research Council,  
19 460 Department of Health and Social Care (England), Chief Scientist Office of the Scottish Government  
20  
21 461 Health and Social Care Directorates, Health and Social Care Research and Development Division  
22  
23 462 (Welsh Government), Public Health Agency (Northern Ireland), British Heart Foundation, Wellcome  
24 463 Trust, The BigData@Heart Consortium, funded by the Innovative Medicines Initiative-2 Joint  
25  
26 464 Undertaking under grant agreement No. 116074.

27 465  
28

29 466 **Data sharing statement:**

30 467 Data used in this study was accessed through the Clinical Practice Research Datalink that is subject  
31  
32 468 to protocol approval by an Independent Scientific Advisory Committee and cannot directly be shared.  
33  
34 469 All results are reported in the manuscript and no additional data is available.

35 470  
36

37 471 **Patient and public involvement statement:**

38 472 The Health Data Research UK hub for cancer (DATA-CAN) patient and public advisory panel were  
39  
40 473 consulted during the writing of this manuscript.

41 474  
42

43 475 **Ethics approval:**

44  
45 476 The study was approved by the MHRA (UK) Independent Scientific Advisory Committee  
46 477 (20\_074R2), under Section 251 (NHS Social Care Act 2006).  
47  
48 478

49  
50  
51  
52  
53  
54  
55  
56  
57  
58  
59  
60

1  
2 479 **References:**

- 3 480 1 Banerjee A, Pasea L, Harris S, *et al.* Estimating excess 1-year mortality associated with the  
4 481 COVID-19 pandemic according to underlying conditions and age: a population-based cohort  
5 482 study. *Lancet* 2020;**395**:1715–25. doi:10.1016/S0140-6736(20)30854-0  
6  
7 483 2 Kuderer NM, Choueiri TK, Shah DP, *et al.* Clinical impact of COVID-19 on patients with  
8 484 cancer (CCC19): a cohort study. *Lancet* 2020.  
9  
10 485 3 Williamson E, Walker AJ, Bhaskaran KJ, *et al.* OpenSAFELY: factors associated with  
11 486 COVID-19-related hospital death in the linked electronic health records of 17 million adult  
12 487 NHS patients. *MedRxiv* 2020.  
13  
14 488 4 Rosenbaum L. The Untold Toll — The Pandemic’s Effects on Patients without Covid-19. *N*  
15 489 *Engl J Med* doi:10.1056/NEJMms2009984  
16  
17 490 5 Vrdoljak E, Sullivan R, Lawler M. Cancer and COVID-19; how do we manage cancer  
18 491 optimally through a public health crisis? *Eur J Cancer* 2020;**132**:P98-99.  
19  
20 492 6 Thomson DJ, Palma D, Guckenberger M, *et al.* Practice recommendations for risk-adapted  
21 493 head and neck cancer radiotherapy during the COVID-19 pandemic: an ASTRO-ESTRO  
22 494 consensus statement. *Int J Radiat Oncol Biol Phys* 2020.  
23  
24 495 7 NHS England. Provider-based Cancer Waiting Times for April 2019. Accessed 17 June  
25 496 2020. [https://www.england.nhs.uk/statistics/statistical-work-areas/cancer-waiting-](https://www.england.nhs.uk/statistics/statistical-work-areas/cancer-waiting-times/monthly-prov-cwt/2019-20-monthly-provider-cancer-waiting-times-statistics/provider-based-cancer-waiting-times-for-april-2019-provisional/)  
26 497 [times/monthly-prov-cwt/2019-20-monthly-provider-cancer-waiting-times-statistics/provider-](https://www.england.nhs.uk/statistics/statistical-work-areas/cancer-waiting-times/monthly-prov-cwt/2019-20-monthly-provider-cancer-waiting-times-statistics/provider-based-cancer-waiting-times-for-april-2019-provisional/)  
27 498 [based-cancer-waiting-times-for-april-2019-provisional/](https://www.england.nhs.uk/statistics/statistical-work-areas/cancer-waiting-times/monthly-prov-cwt/2019-20-monthly-provider-cancer-waiting-times-statistics/provider-based-cancer-waiting-times-for-april-2019-provisional/)  
28  
29 499 8 Burki TK. Cancer guidelines during the COVID-19 pandemic. *Lancet Oncol* 2020.  
30  
31 500 9 British Society of Gastroenterology. Endoscopy activity and COVID-19: BSG and JAG  
32 501 guidance. Accessed 19 April 2020. [https://www.bsg.org.uk/covid-19-advice/endoscopy-](https://www.bsg.org.uk/covid-19-advice/endoscopy-activity-and-covid-19-bsg-and-jag-guidance/)  
33 502 [activity-and-covid-19-bsg-and-jag-guidance/](https://www.bsg.org.uk/covid-19-advice/endoscopy-activity-and-covid-19-bsg-and-jag-guidance/)  
34  
35 503 10 National Institute for Health and Care Excellence. COVID-19 rapid guideline: delivery of  
36 504 systemic anticancer treatments. Accessed 19 April 2020.  
37 505 [https://www.nice.org.uk/guidance/ng161/chapter/6-Prioritising-systemic-anticancer-](https://www.nice.org.uk/guidance/ng161/chapter/6-Prioritising-systemic-anticancer-treatments)  
38 506 [treatments](https://www.nice.org.uk/guidance/ng161/chapter/6-Prioritising-systemic-anticancer-treatments)  
39  
40 507 11 American Cancer Society. Survey: COVID-19 Affecting Patients’ Access to Cancer Care.  
41 508 Accessed 19 April 2020. [https://www.fightcancer.org/releases/survey-covid-19-affecting-](https://www.fightcancer.org/releases/survey-covid-19-affecting-patients-access-cancer-care-5)  
42 509 [patients’-access-cancer-care-5](https://www.fightcancer.org/releases/survey-covid-19-affecting-patients-access-cancer-care-5)  
43  
44 510 12 American College of Surgeons. COVID-19 Guidelines for Triage of Breast Cancer Patients.  
45 511 Accessed 19 April 2020. [https://www.facs.org/covid-19/clinical-guidance/elective-](https://www.facs.org/covid-19/clinical-guidance/elective-case/breast-cancer)  
46 512 [case/breast-cancer](https://www.facs.org/covid-19/clinical-guidance/elective-case/breast-cancer)  
47  
48 513 13 American Society for Radiation Oncology. COVID-19 Coding Guidance. Accessed 19 April  
49 514 2020. [https://www.astro.org/Daily-Practice/Coding/Coding-Guidance/](https://www.astro.org/Daily-Practice/Coding/Coding-Guidance/Coding-Updates/COVID-19-Coding-Guidance)  
50 515 [Coding-](https://www.astro.org/Daily-Practice/Coding/Coding-Guidance/Coding-Updates/COVID-19-Coding-Guidance)  
51 516 [Updates/COVID-19-Coding-Guidance](https://www.astro.org/Daily-Practice/Coding/Coding-Guidance/Coding-Updates/COVID-19-Coding-Guidance)

- 1  
2 517 surgery of the COVID-19 pandemic. *Ann Oncol* 2020.
- 3  
4 518 15 Sud A, Jones ME, Broggio J, *et al*. Quantifying and mitigating the impact of the COVID-19  
5 519 pandemic on outcomes in colorectal cancer. 2020.
- 6  
7 520 16 Lee LYW, Cazier JB, Starkey T, *et al*. COVID-19 mortality in patients with cancer on  
8 521 chemotherapy or other anticancer treatments: a prospective cohort study. *Lancet* 2020.
- 9  
10 522 17 Public Health England. Guidance on shielding and protecting people defined on medical  
11 523 grounds as extremely vulnerable from COVID-19. Accessed 19 April 2020.  
12  
13 524 [https://www.gov.uk/government/publications/guidance-on-shielding-and-protecting-](https://www.gov.uk/government/publications/guidance-on-shielding-and-protecting-extremely-vulnerable-persons-from-covid-19/guidance-on-shielding-and-protecting-extremely-vulnerable-persons-from-covid-19)  
14 525 [extremely-vulnerable-persons-from-covid-19/guidance-on-shielding-and-protecting-](https://www.gov.uk/government/publications/guidance-on-shielding-and-protecting-extremely-vulnerable-persons-from-covid-19/guidance-on-shielding-and-protecting-extremely-vulnerable-persons-from-covid-19)  
15 526 [extremely-vulnerable-persons-from-covid-19](https://www.gov.uk/government/publications/guidance-on-shielding-and-protecting-extremely-vulnerable-persons-from-covid-19/guidance-on-shielding-and-protecting-extremely-vulnerable-persons-from-covid-19)
- 16 526  
17  
18 527 18 Public Health England. Guidance on social distancing for everyone in the UK. Accessed 19  
19 528 April 2020. [https://www.gov.uk/government/publications/covid-19-guidance-on-social-](https://www.gov.uk/government/publications/covid-19-guidance-on-social-distancing-and-for-vulnerable-people/guidance-on-social-distancing-for-everyone-in-the-uk-and-protecting-older-people-and-vulnerable-adults)  
20 529 [distancing-and-for-vulnerable-people/guidance-on-social-distancing-for-everyone-in-the-uk-](https://www.gov.uk/government/publications/covid-19-guidance-on-social-distancing-and-for-vulnerable-people/guidance-on-social-distancing-for-everyone-in-the-uk-and-protecting-older-people-and-vulnerable-adults)  
21 530 [and-protecting-older-people-and-vulnerable-adults](https://www.gov.uk/government/publications/covid-19-guidance-on-social-distancing-and-for-vulnerable-people/guidance-on-social-distancing-for-everyone-in-the-uk-and-protecting-older-people-and-vulnerable-adults)
- 22 530  
23 531 19 Hanna TP, Evans GA, Booth CM. Cancer, COVID-19 and the precautionary principle:  
24 532 prioritizing treatment during a global pandemic. *Nat Rev Clin Oncol* 2020;:1–3.
- 25 532  
26 533 20 Renzi C, Kaushal A, Emery J, *et al*. Comorbid chronic diseases and cancer diagnosis:  
27 534 disease-specific effects and underlying mechanisms. *Nat Rev Clin Oncol* Published Online  
28 535 First: 2019. doi:10.1038/s41571-019-0249-6
- 29 535  
30 536 21 Health Data Research UK. DATA-CAN - The Health Data Research Hub for Cancer.  
31 537 Accessed 20 April 2020. <https://www.hdruc.ac.uk/infrastructure/the-hubs/data-can/>
- 32 537  
33 538 22 George J, Mathur R, Shah AD, *et al*. Ethnicity and the first diagnosis of a wide range of  
34 539 cardiovascular diseases: Associations in a linked electronic health record cohort of 1 million  
35 540 patients. *PLoS One* 2017;**12**:1–17. doi:10.1371/journal.pone.0178945
- 36 540  
37 541 23 Bhaskaran K, Forbes HJ, Douglas I, *et al*. Representativeness and optimal use of body  
38 542 mass index (BMI) in the UK Clinical Practice Research Datalink (CPRD). *BMJ Open*  
39 543 2013;**3**:e003389.
- 40 543  
41 544 24 Mathur R, Bhaskaran K, Chaturvedi N, *et al*. Completeness and usability of ethnicity data in  
42 545 UK-based primary care and hospital databases. *J Public Health (Bangkok)* 2014;**36**:684–92.
- 43 545  
44 546 25 Herrett E, Thomas SL, Schoonen WM, *et al*. Validation and validity of diagnoses in the  
45 547 General Practice Research Database: a systematic review. *Br J Clin Pharmacol* 2010;**69**:4–  
46 548 14.
- 47 548  
48 549 26 Denaxas S, Gonzalez-Izquierdo A, Direk K, *et al*. UK phenomics platform for developing and  
49 550 validating electronic health record phenotypes: CALIBER. *J Am Med Informatics Assoc*  
50 551 2019.
- 51 551  
52 552 27 Denaxas SC, George J, Herrett E, *et al*. Data resource profile: cardiovascular disease  
53 553 research using linked bespoke studies and electronic health records (CALIBER). *Int J*  
54 554 *Epidemiol* 2012;**41**:1625–38.

- 1  
2 555 28 Kuan V, Denaxas S, Gonzalez-Izquierdo A, *et al*. A chronological map of 308 physical and  
3 556 mental health conditions from 4 million individuals in the English National Health Service.  
4 557 *Lancet Digit Heal* 2019;**1**:e63–77. doi:10.1016/S2589-7500(19)30012-3
- 5 558 29 Shah AD, Langenberg C, Rapsomaniki E, *et al*. Type 2 diabetes and incidence of  
6 559 cardiovascular diseases: A cohort study in 1.9 million people. *Lancet Diabetes Endocrinol*  
7 560 2015;**3**:105–13. doi:10.1016/S2213-8587(14)70219-0
- 8 561 30 Rapsomaniki E, Timmis A, George J, *et al*. Blood pressure and incidence of twelve  
9 562 cardiovascular diseases: Lifetime risks, healthy life-years lost, and age-specific associations  
10 563 in 1.25 million people. *Lancet* 2014;**383**:1899–911. doi:10.1016/S0140-6736(14)60685-1
- 11 564 31 Pikoula M, Quint JK, Nissen F, *et al*. Identifying clinically important COPD sub-types using  
12 565 data-driven approaches in primary care population based electronic health records. *BMC*  
13 566 *Med Inform Decis Mak* 2019;**19**:86.
- 14 567 32 Pujades-Rodriguez M, Duyx B, Thomas SL, *et al*. Rheumatoid arthritis and incidence of  
15 568 twelve initial presentations of cardiovascular disease: a population record-linkage cohort  
16 569 study in England. *PLoS One* 2016;**11**.
- 17 570 33 Dai M, Liu D, Liu M, *et al*. Patients with cancer appear more vulnerable to SARS-COV-2: a  
18 571 multi-center study during the COVID-19 outbreak. *Cancer Discov* Published Online First:  
19 572 2020. doi:10.1158/2159-8290.CD-20-0422
- 20 573 34 Office for National Statistics. Coronavirus (COVID-19) Infection Survey.  
21 574 <https://www.ons.gov.uk/peoplepopulationandcommunity/healthandsocialcare/conditionsanddiseases/datasets/coronaviruscovid19infectionsurveydata>. Accessed 3 September 2020.
- 22 575 35 GOV UK. Sero-surveillance of COVID-19.  
23 576 <https://www.gov.uk/government/publications/national-covid-19-surveillance-reports/sero-surveillance-of-covid-19>. Accessed 3 September 2020.
- 24 577 36 Valenti L, Bergna A, Pelusi S, *et al*. SARS-CoV-2 seroprevalence trends in healthy blood  
25 578 donors during the COVID-19 Milan outbreak. *medRxiv* 2020.
- 26 579 37 Salje H, Kiem CT, Lefrancq N, *et al*. Estimating the burden of SARS-CoV-2 in France.  
27 580 *Science (80- )* 2020.
- 28 581 38 Understanding Society COVID-19 survey. Accessed 17 June 2020.  
29 582 [https://www.understandingsociety.ac.uk/sites/default/files/downloads/general/ukhls\\_briefing\\_note\\_covid\\_health\\_final.pdf](https://www.understandingsociety.ac.uk/sites/default/files/downloads/general/ukhls_briefing_note_covid_health_final.pdf).
- 30 583 39 Office for National Statistics. Estimates of the population for the UK, England and Wales,  
31 584 Scotland and Northern Ireland. Accessed 23 April 2020.  
32 585 <https://www.ons.gov.uk/peoplepopulationandcommunity/populationandmigration/populationestimates/datasets/populationestimatesforukenglandandwalesscotlandandnorthernireland>
- 33 586 40 NHS England. NHS warning to seek help for cancer symptoms, as half of public report  
34 587 concerns with getting checked. <https://tinyurl.com/y6owtj4u>.
- 35 588 41 Margulis A V, Fortuny J, Kaye JA, *et al*. Validation of cancer cases using primary care,

- 1  
2 593 cancer registry, and hospitalization data in the United Kingdom. *Epidemiology* 2018;**29**:308.  
3  
4 594 42 Banerjee A, Chen S, Pasea L, *et al*. Excess deaths in people with cardiovascular diseases  
5 595 during the COVID-19 pandemic. *medRxiv* Published Online First: 2020.  
6  
7 596 doi:10.1101/2020.06.10.20127175  
8 597 43 Kroenke CH, Kubzansky LD, Schernhammer ES, *et al*. Social networks, social support, and  
9 survival after breast cancer diagnosis. *J Clin Oncol* 2006;**24**:1105–11.  
10 598  
11 599 44 Elovainio M, Hakulinen C, Pulkki-Råback L, *et al*. Contribution of risk factors to excess  
12 mortality in isolated and lonely individuals: an analysis of data from the UK Biobank cohort  
13 600 study. *Lancet Public Heal* 2017;**2**:e260--e266.  
14  
15 601  
16 602 45 Maruthappu M, Watkins J, Noor AM, *et al*. Economic downturns, universal health coverage,  
17 and cancer mortality in high-income and middle-income countries, 1990--2010: a  
18 603 longitudinal analysis. *Lancet* 2016;**388**:684–95.  
19 604  
20  
21 605 46 Longer-Run Economic Consequences of Pandemics. Accessed 1 May 2020.  
22  
23 606 <https://www.frbsf.org/economic-research/files/wp2020-09.pdf>  
24 607  
25  
26  
27  
28  
29  
30  
31  
32  
33  
34  
35  
36  
37  
38  
39  
40  
41  
42  
43  
44  
45  
46  
47  
48  
49  
50  
51  
52  
53  
54  
55  
56  
57  
58  
59  
60

1  
2 608 **Figure legends:**  
3 609

4 610 Figure 1. Weekly hospital data (January 2019 to June 2020) on changes in urgent referrals and  
5 611 chemotherapy clinic attendance from eight hospitals in the UK mapped to phases of the pandemic.  
6 612 Weekly changes from January 2020 to June 2020 were mapped to phases of the pandemic. Weekly  
7 613 values were plotted as percentage increase or decrease relative to the 2019 average. The data for  
8 614 Northern Ireland includes five Health and Social Care Trusts (HSCs) that cover all health service  
9 615 provision in Northern Ireland: Belfast HSC, Northern HSC, South Eastern HSC, Southern HSC and  
10 616 Western HSC. Vertical dotted lines indicate the Christmas Bank Holiday.  
11 617

12 618 Figure 2. Office for National Statistics data on weekly registrations of deaths in the England and  
13 619 Wales from 3 January 2020 to 15 May 2020. (A) Upper panel indicates the number of weekly deaths.  
14 620 (B) Lower panel indicates weekly changes in relative risk estimates calculated by comparing the  
15 621 current weekly deaths to 5-year weekly averages. Dates indicate week ending on a particular date.  
16 622

17 623 Figure 3. Estimated total (direct and indirect) excess deaths by cancer site over a 1-year period (A)  
18 624 1-year mortality for incident and prevalent cancers. The whiskers are 95% confidence intervals. (B)  
19 625 Total excess deaths were scaled up to the population of England aged 30+ consisting of 35 million  
20 626 individuals using England mortality estimates for both incident and prevalent cancers combined. We  
21 627 estimated direct excess deaths at a 10% infection rate. We estimated total (direct and indirect)  
22 628 excess deaths for 40% (10% infected, 30% affected) and 80% (10% infected, 70% affected) of the  
23 629 population.  
24 630

25 631 Figure 4. Total (direct and indirect) excess deaths for both incident and prevalent cancers by cancer  
26 632 site and number of comorbidities over a 1-year period. Stacked bar chart indicates the proportion of  
27 633 individuals with 0, 1, 2 and 3+ comorbidities by cancer site. We estimated total excess deaths for  
28 634 40% (10% infected, 30% affected) of the population. Total excess deaths were scaled up to the  
29 635 population of England aged 30+ consisting of 35 million individuals using England mortality estimates  
30 636 for both incident and prevalent cancers combined.  
31 637  
32 638

33 639 **Supplementary figure legends:**  
34 640

35 641 Figure S1. Age-adjusted incidence rates for 24 primary cancers from England and the UK  
36 642 (International Agency for Research on Cancer [IARC]) For England data, cervix refers to both  
37 643 carcinoma in situ of cervix and primary malignancy of cervix. For IARC data, only cervix uteri are  
38 644 included. CRUK: Cancer Research UK.  
39 645

1  
2 646 Figure S2. Total excess deaths for incident cancers over a 1-year period scaled up to the population  
3 647 of England aged 30+ consisting of 35 million individuals using England mortality estimates. We  
4 648 estimated direct excess deaths at a 10% infection rate. We estimated total (direct and indirect)  
5 649 excess deaths for 40% (10% infected, 30% affected) and 80% (10% infected, 70% affected) of the  
6 650 population.  
7  
8  
9

10 651  
11 652 Figure S3. Total excess deaths for prevalent cancers over a 1-year period scaled up to the population  
12 653 of England aged 30+ consisting of 35 million individuals using England mortality estimates. We  
13 654 estimated direct excess deaths at a 10% infection rate. We estimated total (direct and indirect)  
14 655 excess deaths for 40% (10% infected, 30% affected) and 80% (10% infected, 70% affected) of the  
15 656 population.  
16  
17  
18

19 657  
20  
21 658 Figure S4. Proportion of patients with any of the 15 comorbidity clusters by cancer site for incident  
22 659 cancers (N=199,057) in a population of 3,862,012 adults in England. Age indicates mean age at  
23 660 diagnosis.  
24  
25

26 661  
27 662 Figure S5. Proportion of patients with any of the 15 comorbidity clusters by cancer site for prevalent  
28 663 cancers (N=117,978) in a population of 3,862,012 adults in England. Age indicates mean age at  
29 664 diagnosis.  
30  
31

32 665  
33 666 Figure S6. Forest plot of background (pre-COVID-19) 1-year cancer mortality for incident cases  
34 667 according to cancer site and number of underlying comorbidities in England. The whiskers are 95%  
35 668 confidence intervals.  
36  
37

38 669  
39  
40 670 Figure S7. Forest plot of background (pre-COVID-19) 1-year cancer mortality for prevalent cases  
41 671 according to cancer site and number of underlying comorbidities in England. The whiskers are 95%  
42 672 confidence intervals.  
43  
44

45 673  
46 674 Figure S8. Total (direct and indirect) excess deaths for incident cancers by cancer site and number  
47 675 of comorbidities over a 1-year period. Stacked bar chart indicates the proportion of individuals with  
48 676 0, 1, 2 and 3+ comorbidities by cancer site. We estimated total excess deaths for 40% (10% infected,  
49 677 30% affected) of the population. Total excess deaths were scaled up to the population of England  
50 678 aged 30+ consisting of 35 million individuals using England mortality estimates for incident cancers.  
51  
52

53 679  
54  
55 680 Figure S9. Total (direct and indirect) excess deaths for prevalent cancers by cancer site and number  
56 681 of comorbidities over a 1-year period. Stacked bar chart indicates the proportion of individuals with  
57 682 0, 1, 2 and 3+ comorbidities by cancer site. We estimated total excess deaths for 40% (10% infected,  
58  
59  
60



1  
2  
3  
4  
5  
6  
7  
8  
9  
10  
11  
12  
13  
14  
15  
16  
17  
18  
19  
20  
21  
22  
23  
24  
25  
26  
27  
28  
29  
30  
31  
32  
33  
34  
35  
36  
37  
38  
39  
40  
41  
42  
43  
44  
45  
46  
47  
48  
49  
50  
51  
52  
53  
54  
55  
56  
57  
58  
59  
60

683 30% affected) of the population. Total excess deaths were scaled up to the population of England  
684 aged 30+ consisting of 35 million individuals using England mortality estimates for prevalent cancers.  
685

For peer review only

## **Supplementary Methods**

### ***Description on 15 comorbidity clusters relevant to COVID-19***

The PHE list included chronic respiratory disease, chronic heart disease, immunocompromised individuals, HIV, use of corticosteroids, obesity, diabetes, chronic kidney disease, chronic liver disease, chronic neurological disorders and splenic disorders. We have performed analyses for all the above conditions and have additionally considered hypertension, Crohn's disease, cystic fibrosis and rheumatoid arthritis. Given that condition clusters such as **(i)** chronic heart disease would involve a range of conditions, we have derived composite variables to include 15 conditions considered as cardiovascular disease (CVD) that included acute myocardial infarction, unstable angina, chronic stable angina, heart failure, cardiac arrest or sudden coronary death, transient ischemic attack, intracerebral haemorrhage, subarachnoid haemorrhage, ischemic stroke, abdominal aortic aneurysm, peripheral arterial disease, atrial fibrillation, congenital heart disease, hypertrophic and dilated cardiomyopathy and valve disease (multiple, mitral and aortic)[29]. We also considered **(ii)** Hypertension, defined as  $\geq 140$  mmHg systolic blood pressure (or  $\geq 150$  mmHg for people aged  $\geq 60$  years without diabetes and chronic kidney disease) and/or  $\geq 90$  mmHg diastolic blood pressure[30], **(iii)** type 2 diabetes, **(iv)** obesity, defined as a body mass index of  $\geq 40$  kg/m<sup>2</sup>, **(v)** chronic kidney disease (CKD), **(vi)** chronic obstructive pulmonary disease (COPD)[31], **(vii)** patients on immunosuppressive drugs (not cancer chemotherapy), **(viii)** patients with HIV or corticosteroid prescription, **(ix)** chronic neurological disorders, defined as a composite of Parkinson's disease, motor neuron disease, learning disability and cerebral palsy, **(x)** multiple sclerosis separately, **(xi)** splenic disorders, defined as a composite of splenomegaly, splenectomy and hyposplenism, **(xii)** chronic liver diseases, defined as a composite of chronic viral hepatitis B or C, primary biliary cholangitis, liver fibrosis, liver cirrhosis and non-alcoholic fatty liver disease, **(xiii)** Crohn's disease, **(xiv)** cystic fibrosis and **(xv)** rheumatoid arthritis[32].

Figure 1. Weekly hospital data (January 2019 to June 2020) on changes in urgent referrals and chemotherapy clinic attendance from eight hospitals in the UK mapped to phases of the pandemic. Weekly changes from January 2020 to June 2020 were mapped to phases of the pandemic. Weekly values were plotted as percentage increase or decrease relative to the 2019 average. The data for Northern Ireland includes five Health and Social Care Trusts (HSCs) that cover all health service provision in Northern Ireland: Belfast HSC, Northern HSC, South Eastern HSC, Southern HSC and Western HSC. Vertical dotted lines indicate the Christmas Bank Holiday.

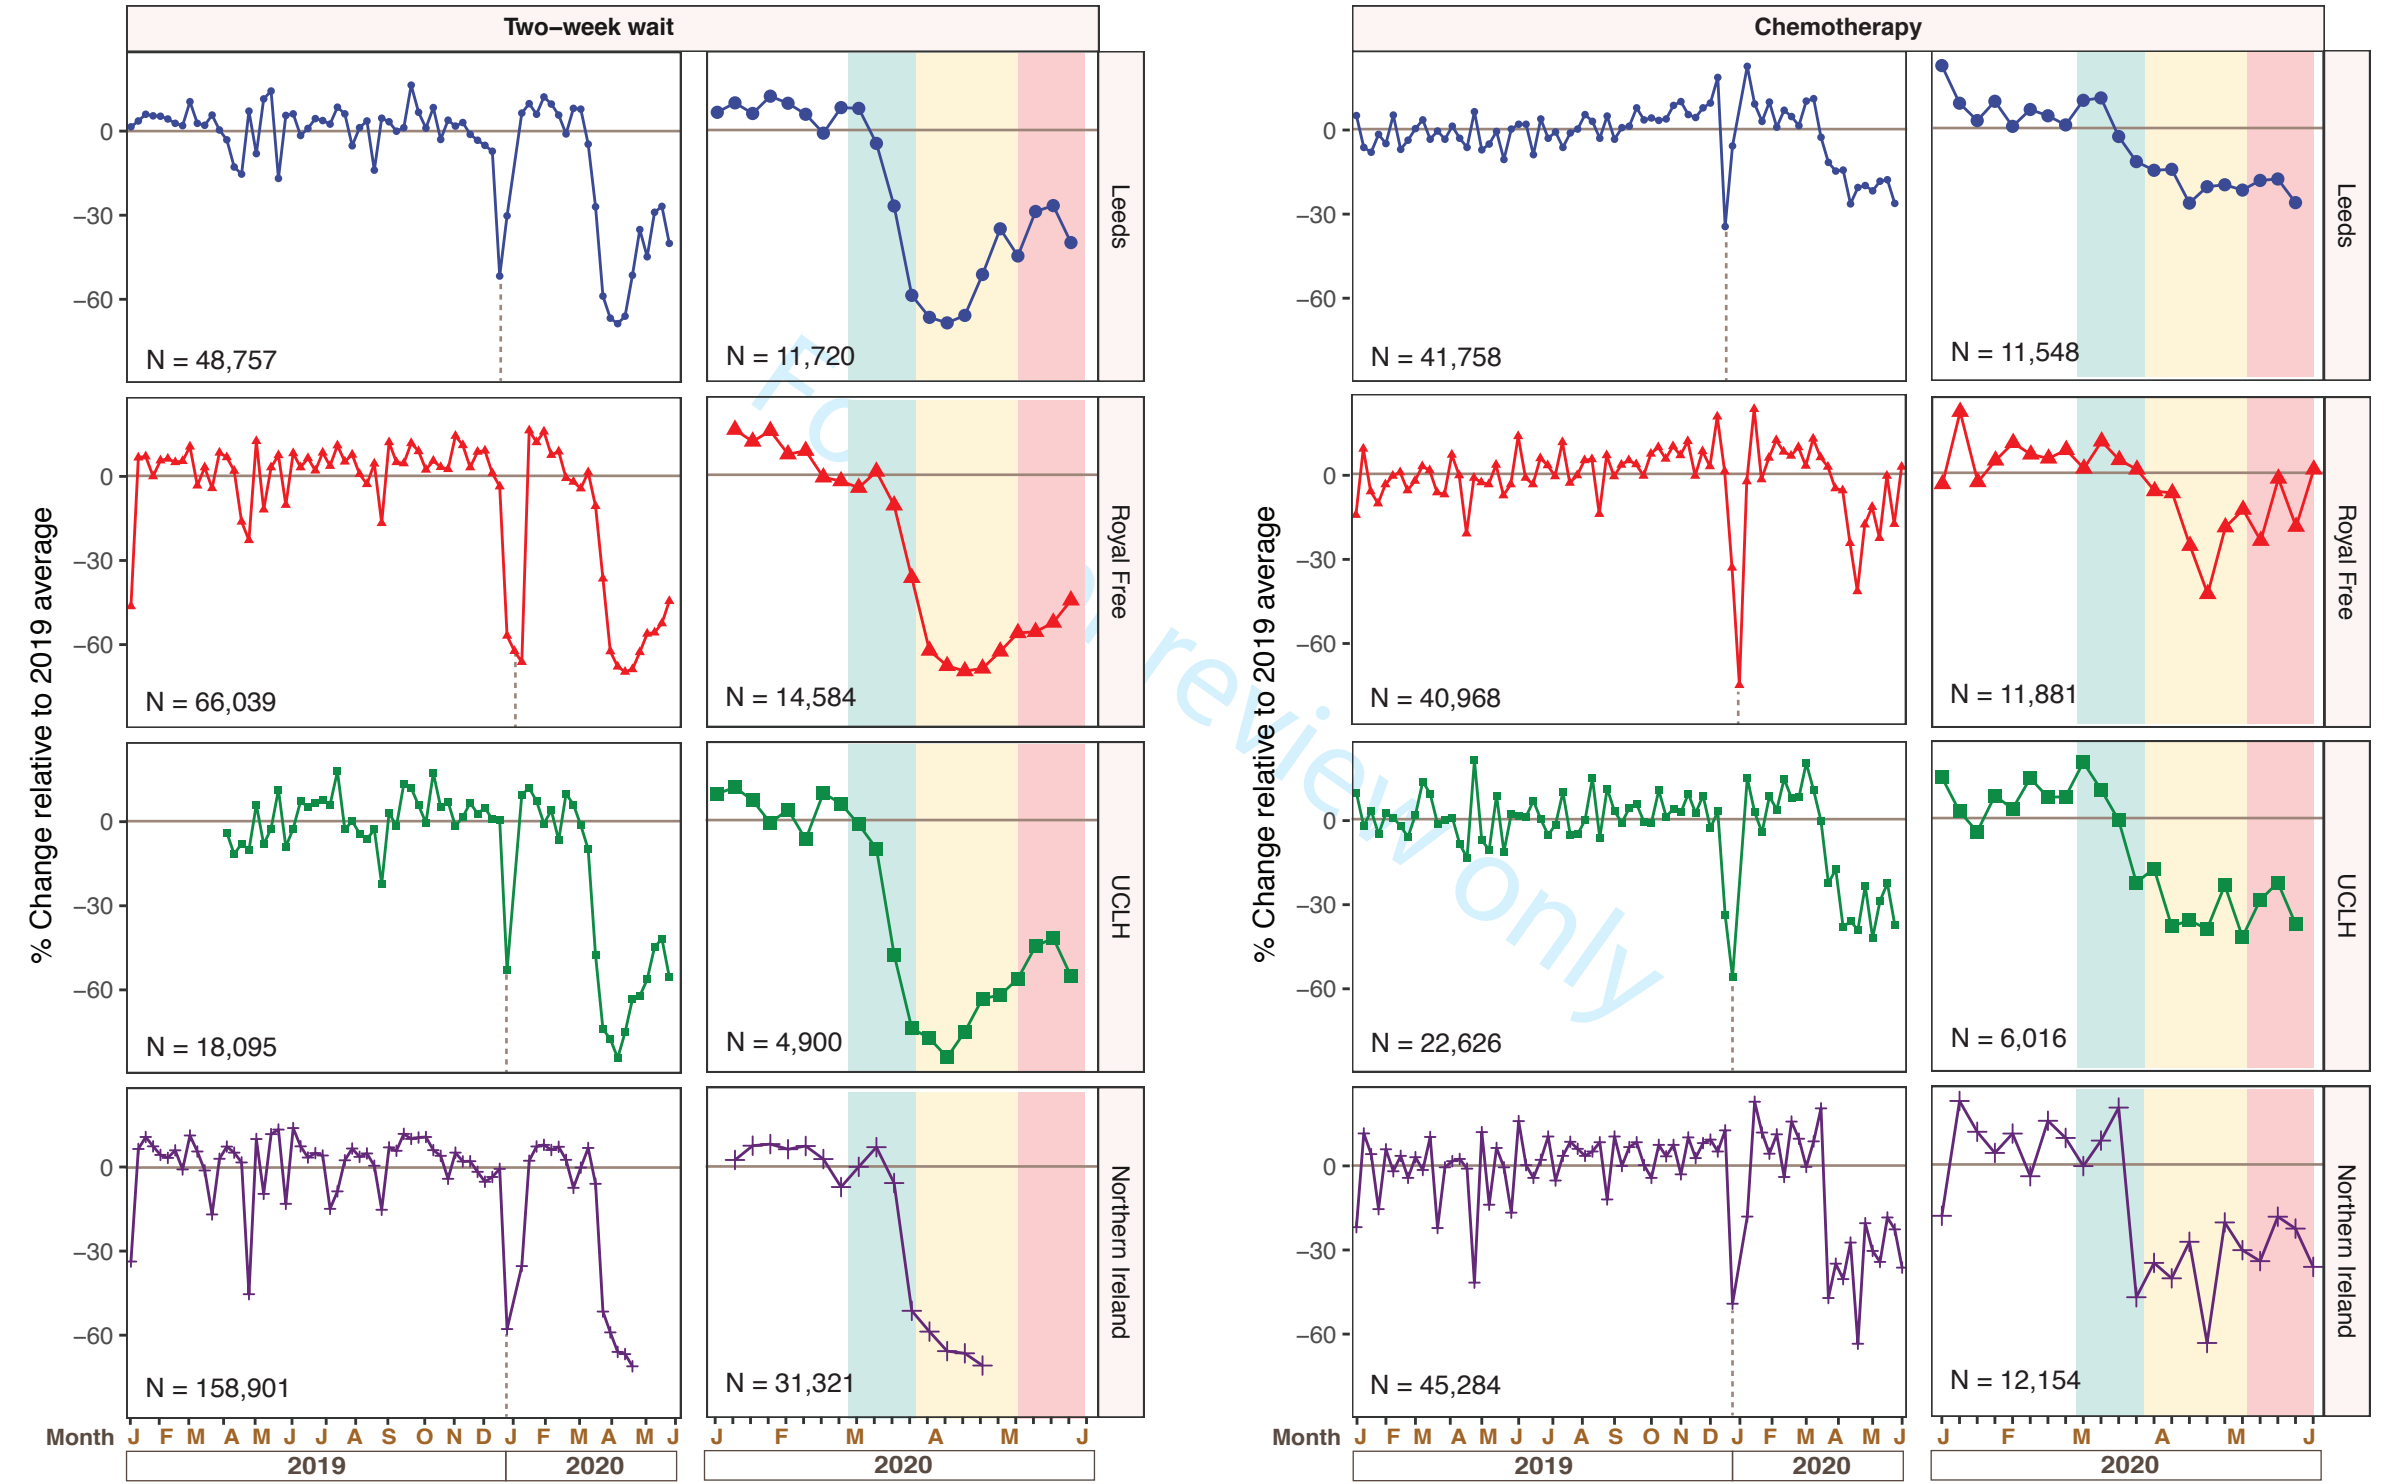

Phases of the pandemic

29 February 2020 day of 50th case <http://bmjopen.bmj.com/first-2020-000000>

11 May 2020 ease of lockdown

Page 17 of 28  
 Figure 2. Office for National Statistics data on weekly registrations of deaths in the England and Wales from 3 January 2020 to 15 May 2020. (A) Upper panel indicates the number of weekly deaths. (B) Lower panel indicates weekly changes in relative risk estimates calculated by comparing the current weekly deaths to 5-year weekly averages. Dates indicate week ending on a particular date.

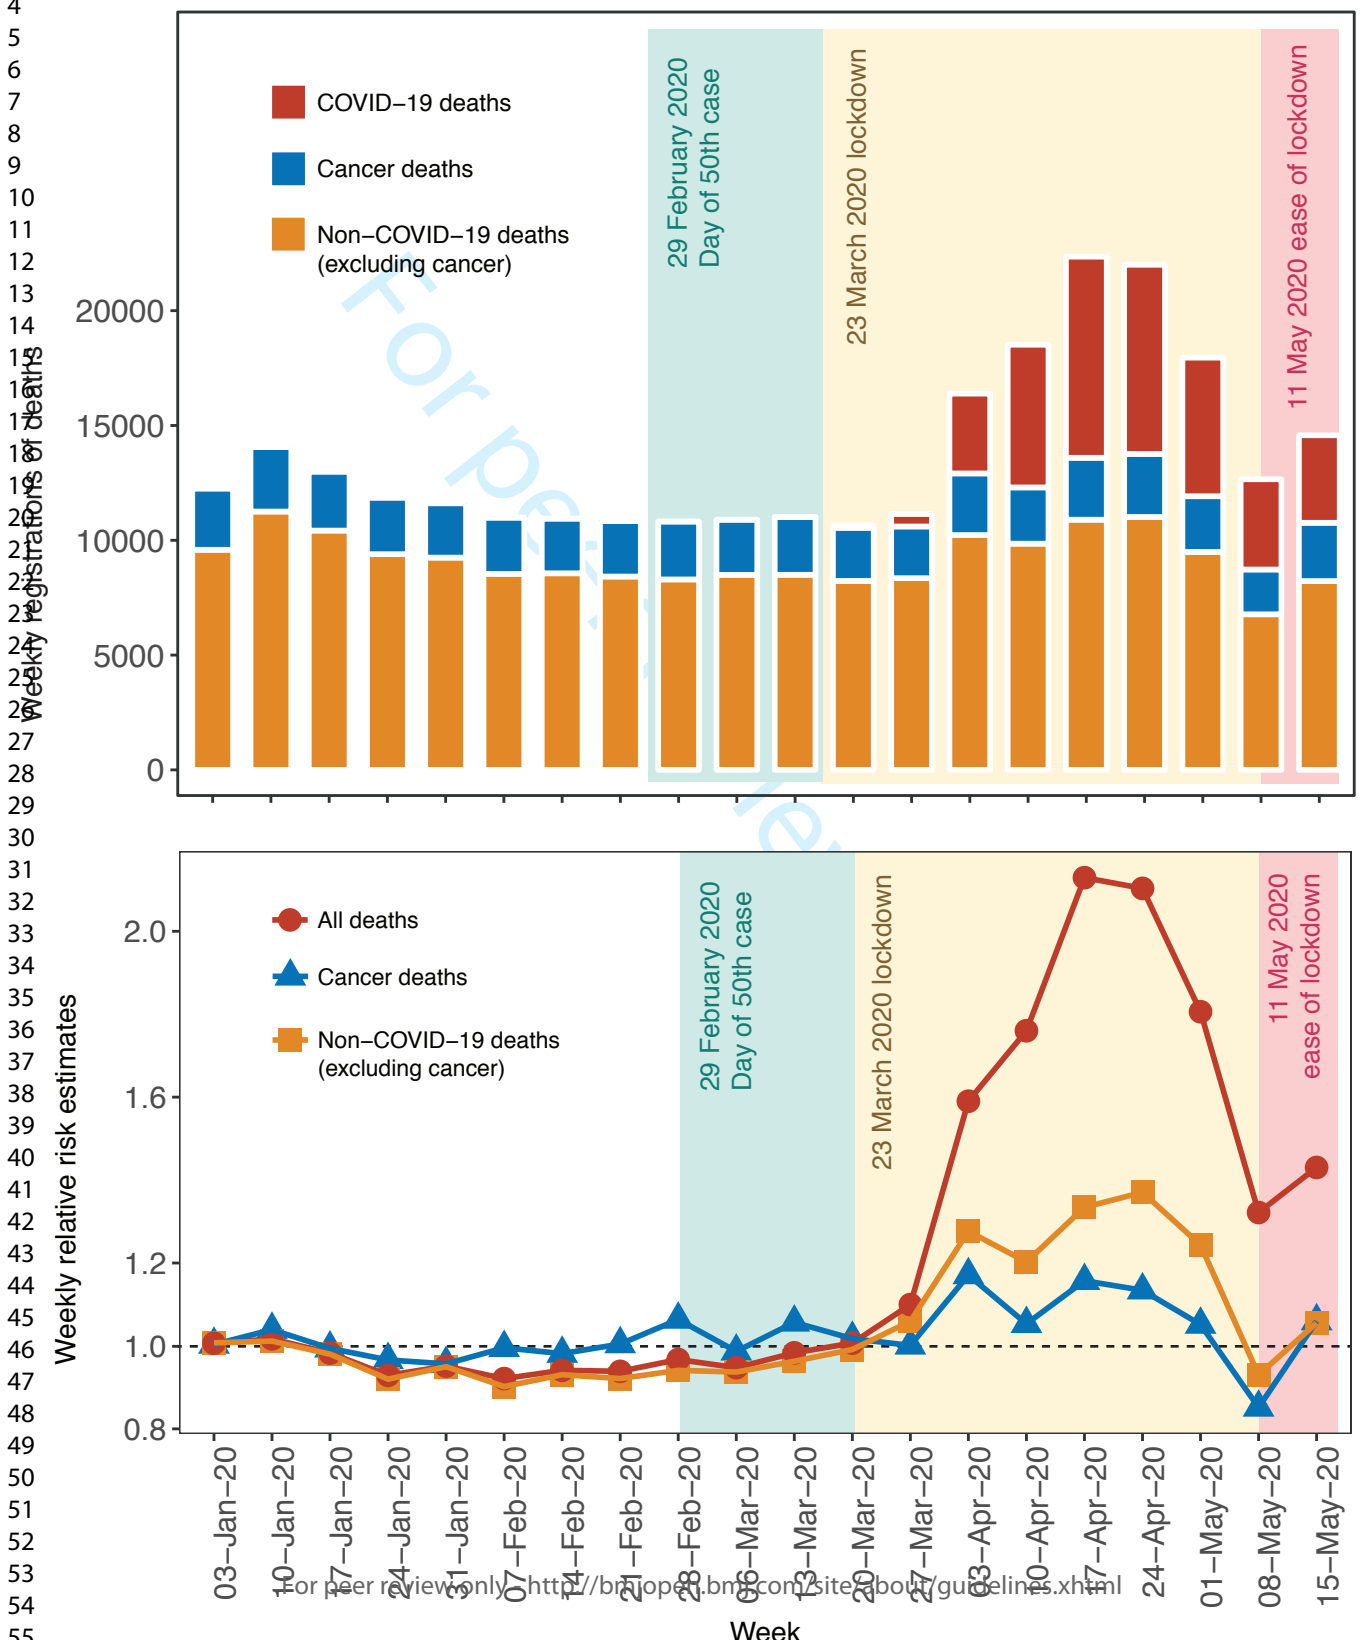

Figure 3. Estimated total (direct and indirect) excess deaths by cancer site over a 1-year period (A) 1-year mortality for incident and prevalent cancers. The whiskers are 95% confidence intervals. (B) Total excess deaths were scaled up to the population of England aged 30+ consisting of 35 million individuals using England mortality estimates for both incident and prevalent cancers combined. We estimated direct excess deaths at a 10% infection rate. We estimated total (direct and indirect) excess deaths for 40% (10% infected, 30% affected) and 80% (10% infected, 70% affected) of the population.

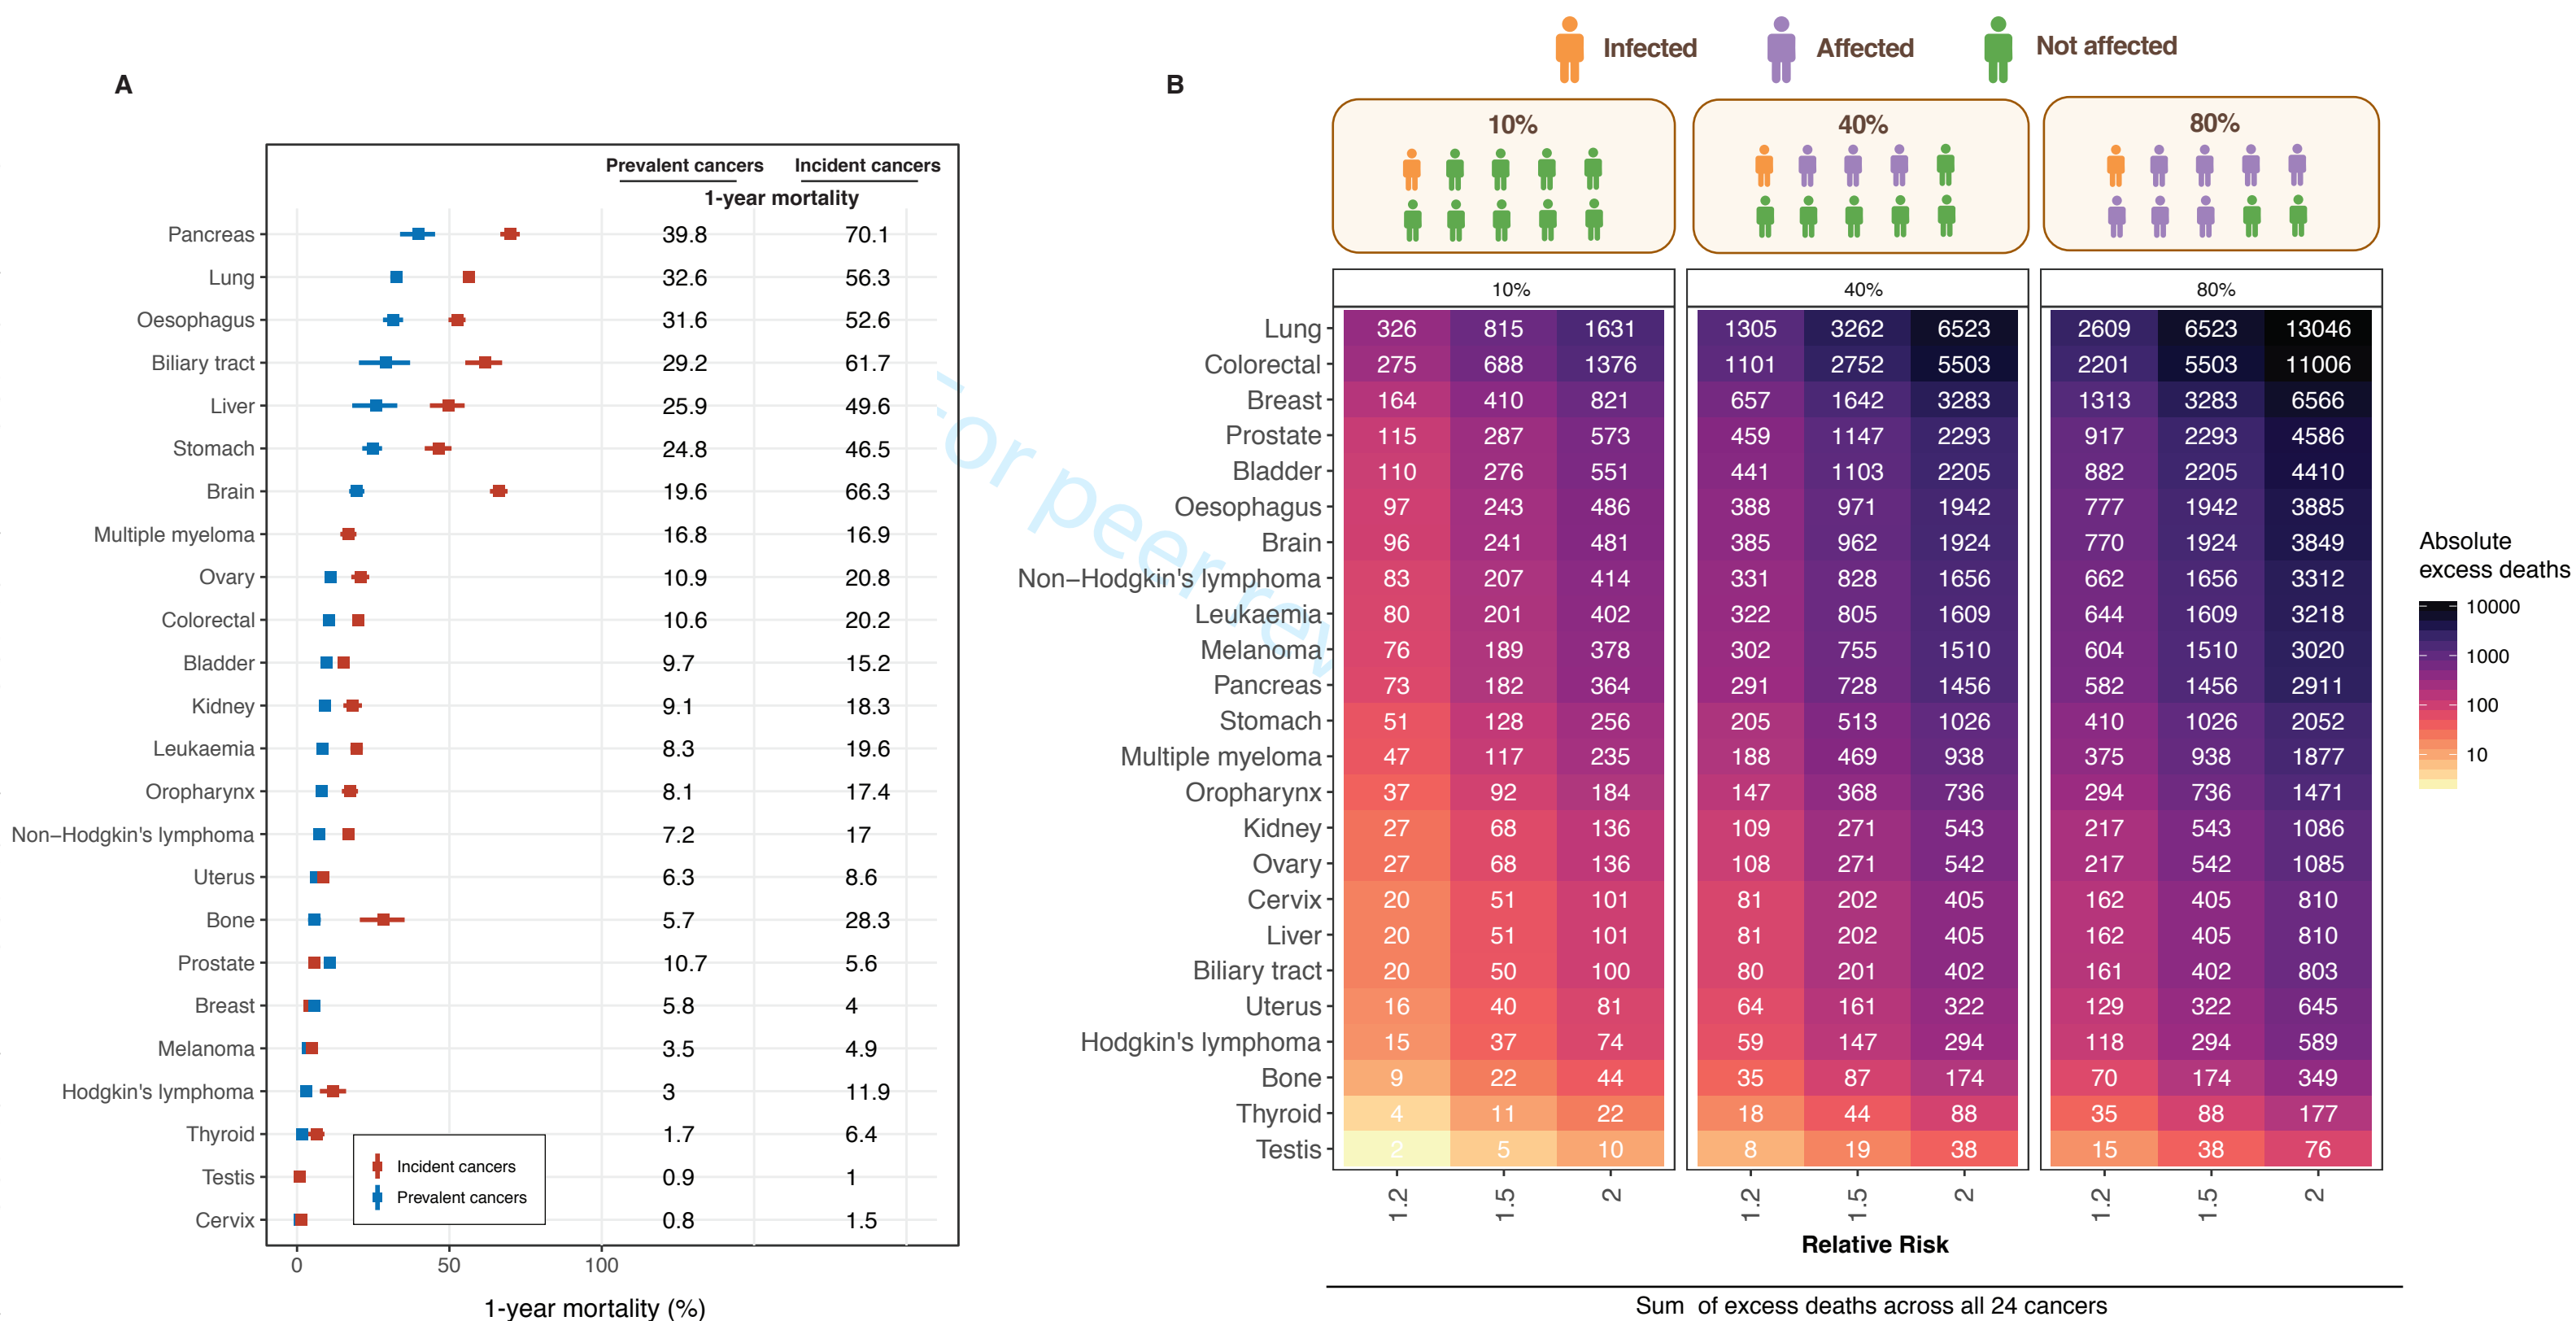

Figure 4. Total (direct and indirect) excess deaths for both incident and prevalent cancers by cancer site and number of comorbidities over a 1-year period. Stacked bar chart indicates the proportion of individuals with 0, 1, 2 and 3+ comorbidities by cancer site. We estimated total excess deaths for 40% (10% infected, 30% affected) of the population. Total excess deaths were scaled up to the population of England aged 30+ consisting of 35 million individuals using England mortality estimates for both incident and prevalent cancers combined.

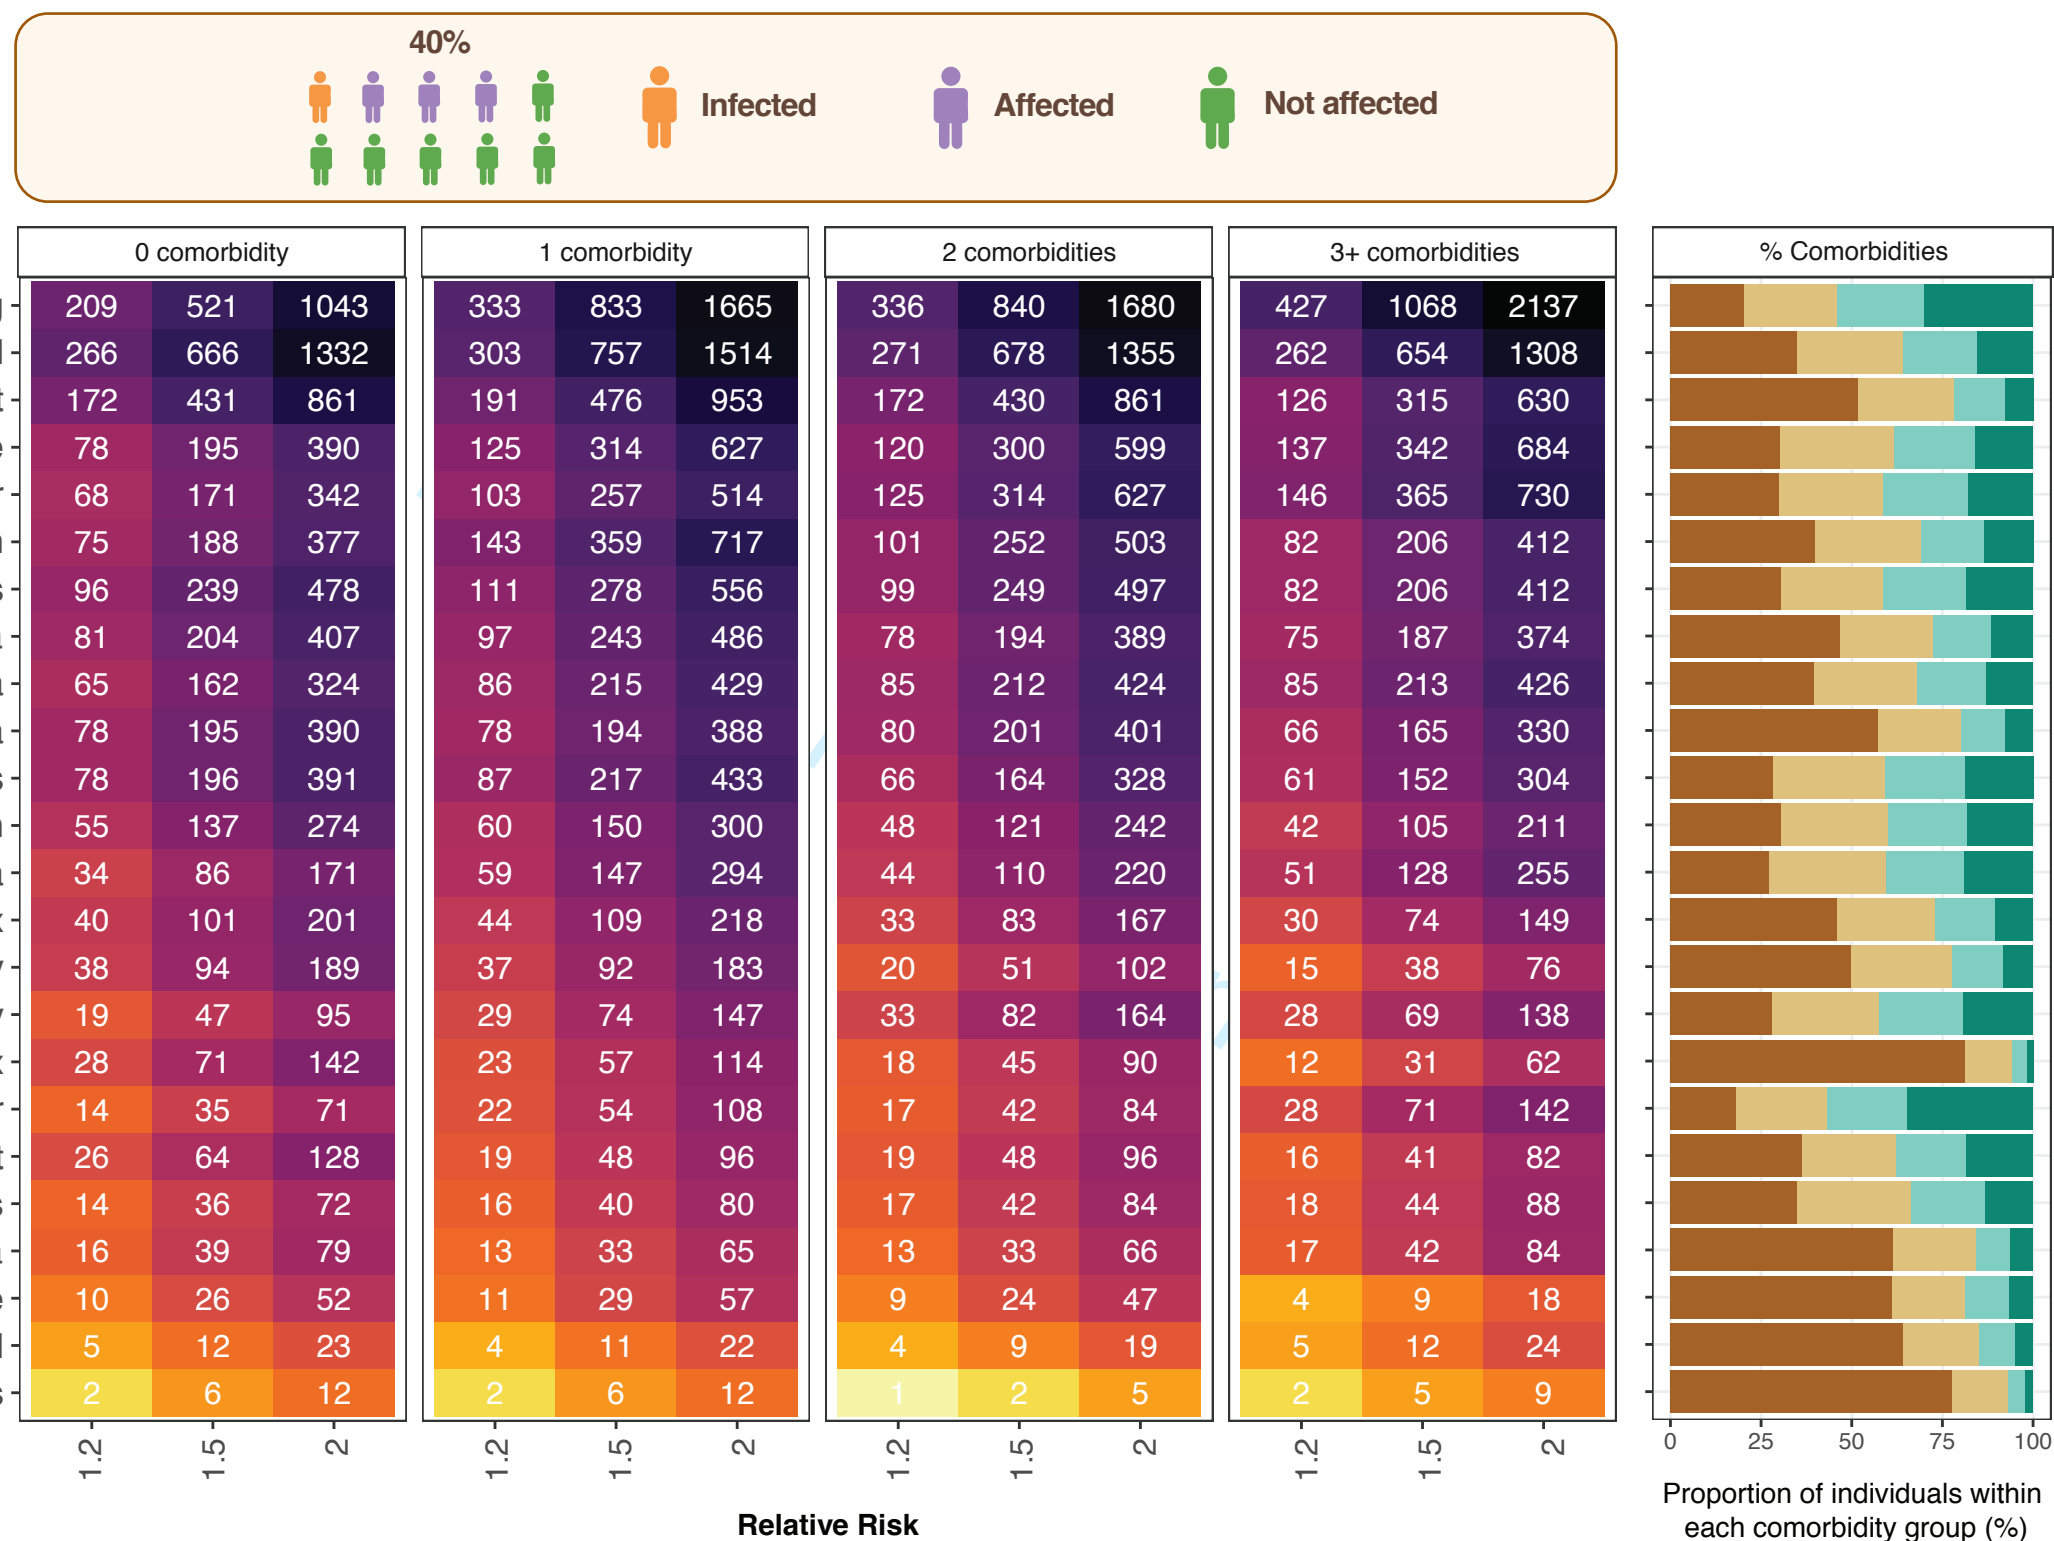

Sum of excess deaths across all 24 cancers

1,567    3,922    7,844    1,996    4,993    9,978    1,809    4,526    9,050    1,817    4,542    9,085

Figure S1. Age-adjusted incidence rates for 24 primary cancers from England and the UK (International Agency for Research on Cancer [IARC]) For England data, cervix refers to both carcinoma in situ of cervix and primary malignancy of cervix. For IARC data, only cervix uteri are included. CRUK: Cancer Research UK.

1  
2  
3  
4  
5  
6  
7  
8  
9  
10  
11  
12  
13  
14  
15  
16  
17  
18  
19  
20  
21  
22  
23  
24  
25  
26  
27  
28  
29  
30  
31  
32  
33  
34  
35  
36  
37  
38  
39  
40  
41  
42  
43  
44  
45  
46  
47  
48

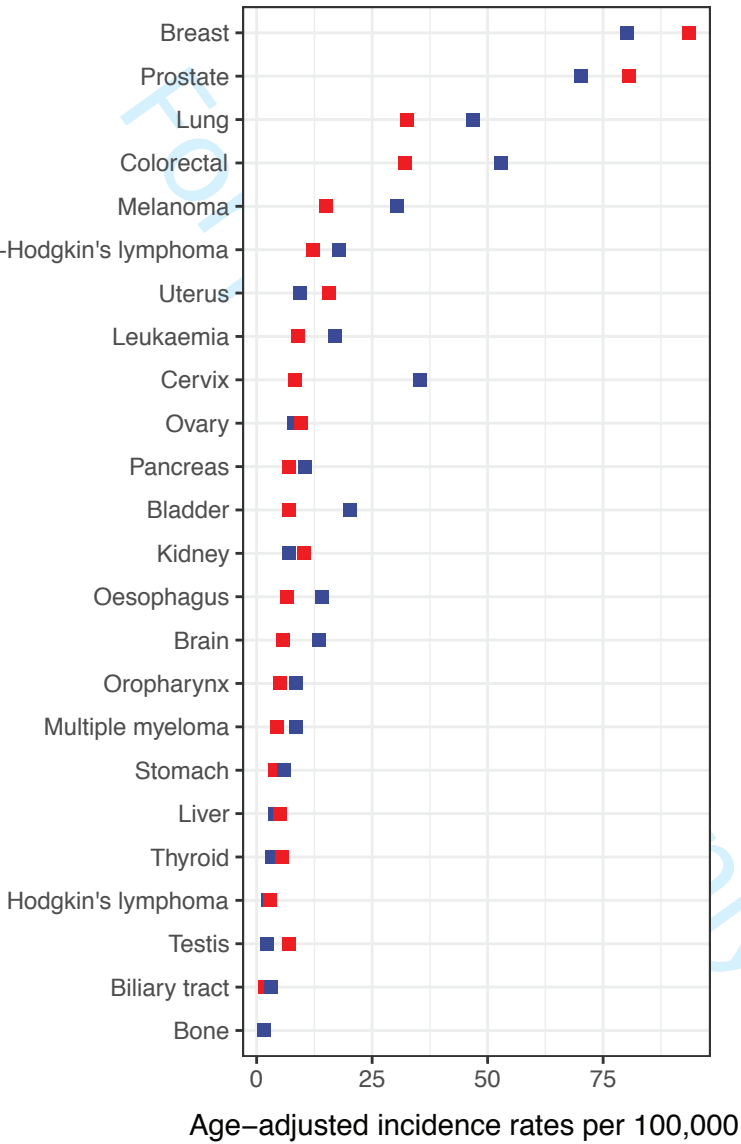

**All cancer incidence rate**

■ England (CALIBER) 635 per 100,000  
■ UK (IARC) 590 per 100,000 (from CRUK)

Figure S2. Total excess deaths for incident cancers over a 1-year period scaled up to the population of England aged 30+ consisting of 35 million individuals using England mortality estimates. We estimated direct excess deaths at a 10% infection rate. We estimated total (direct and indirect) excess deaths for 40% (10% infected, 30% affected) and 80% (10% infected, 70% affected) of the population.

1  
2  
3  
4  
5  
6  
7  
8  
9  
10  
11  
12  
13  
14  
15  
16  
17  
18  
19  
20  
21  
22  
23  
24  
25  
26  
27  
28  
29  
30  
31  
32  
33  
34  
35  
36  
37  
38  
39  
40  
41  
42  
43  
44  
45  
46  
47  
48  
49  
50  
51  
52  
53  
54  
55  
56  
57  
58  
59





Figure S3. Total excess deaths for prevalent cancers over a 1-year period scaled up to the population of England aged 30+ consisting of 35 million individuals using England mortality estimates. We estimated direct excess deaths at a 10% infection rate. We estimated total (direct and indirect) excess deaths for 40% (10% infected, 30% affected) and 80% (10% infected, 70% affected) of the population.



Figure S4. Proportion of patients with any of the 15 comorbidity clusters by cancer site for incident cancers (N=199,057) in a population of 3,862,012 adults in England. Age indicates mean age at diagnosis.



Figure S5. Proportion of patients with any of the 15 comorbidity clusters by cancer site for prevalent cancers (N=117,978) in a population of 3,862,012 adults in England. Age indicates mean age at diagnosis.

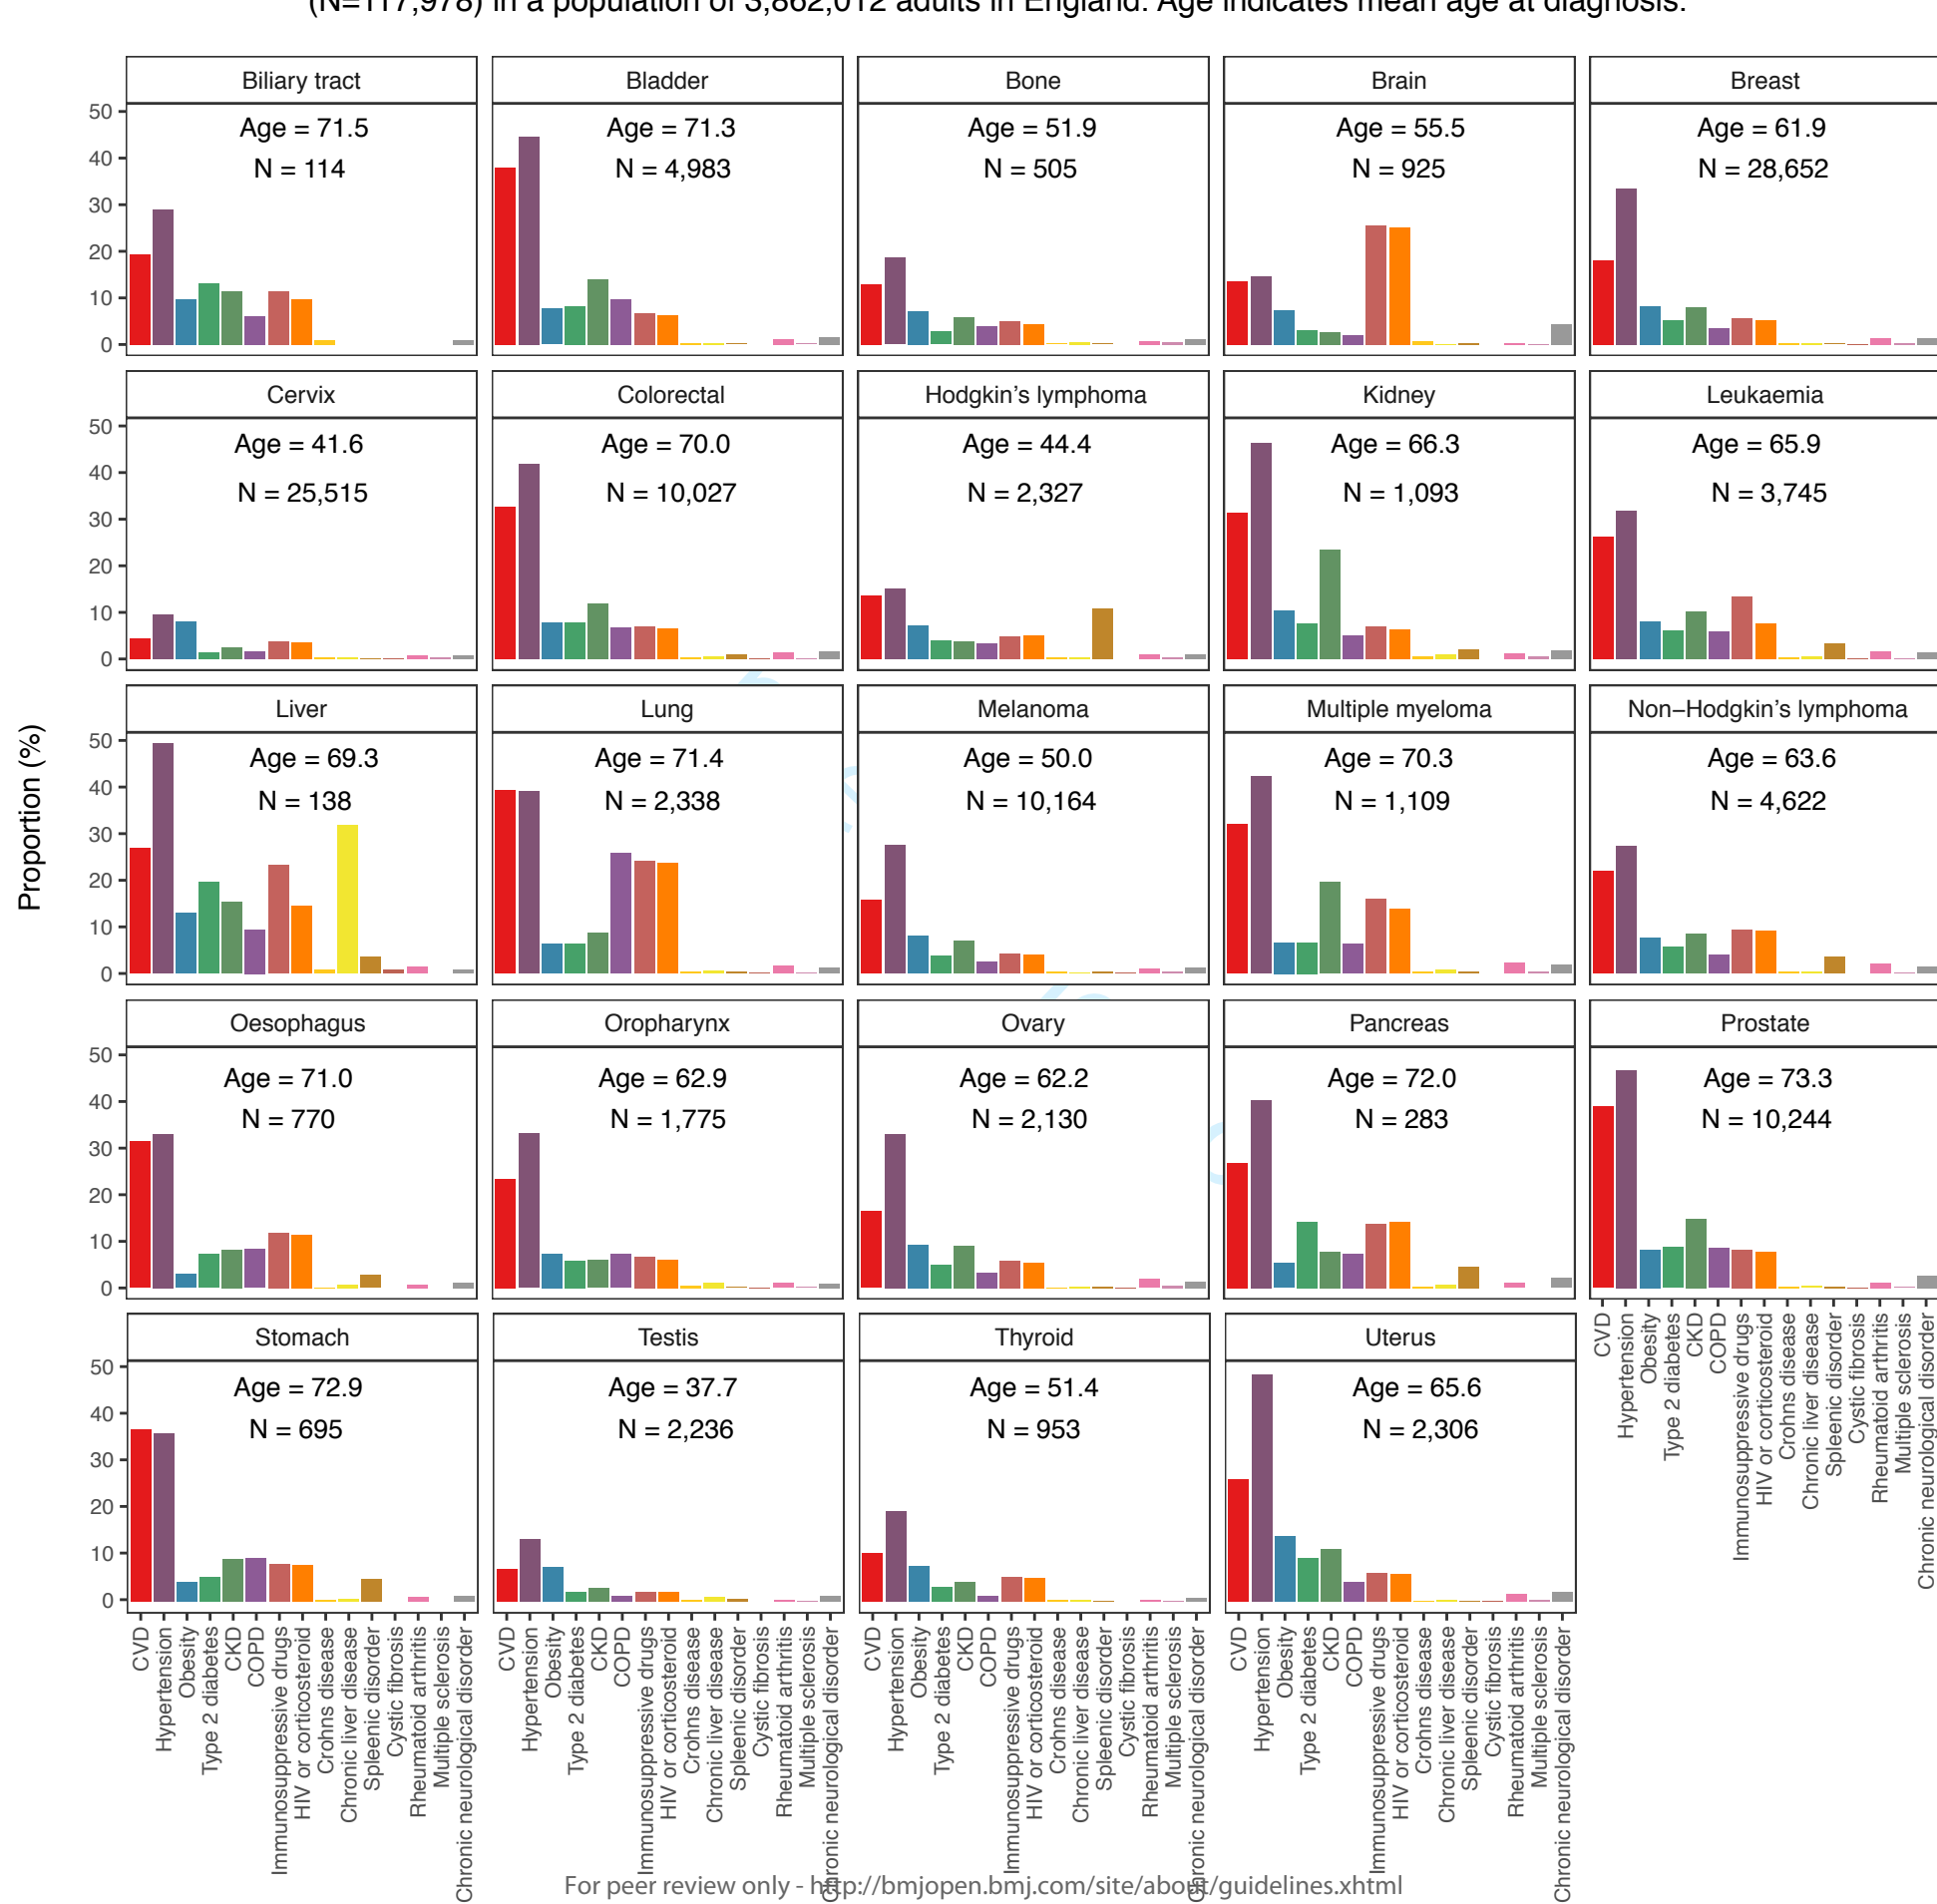

Figure S6. Forest plot of background (pre-COVID-19) 1-year cancer mortality for incident cases according to cancer site and number of underlying comorbidities in England. The whiskers are 95% confidence intervals.

1  
2  
3  
4  
5  
6  
7  
8  
9  
10  
11  
12  
13  
14  
15  
16  
17  
18  
19  
20  
21  
22  
23  
24  
25  
26  
27  
28  
29  
30  
31  
32  
33  
34  
35  
36  
37  
38  
39  
40



For peer review only <http://bmjopen.bmj.com/site/about/guidelines.xhtml>

Mortality (%)

Figure S7. Forest plot of background (pre-COVID-19) 1-year cancer mortality for prevalent cases according to cancer site and number of underlying comorbidities in England. The whiskers are 95% confidence intervals.



Figure S8. Total (direct and indirect) excess deaths for incident cancers by cancer site and number of comorbidities over a 1-year period. Stacked bar chart indicates the proportion of individuals with 0, 1, 2 and 3+ comorbidities by cancer site. We estimated total excess deaths for 40% (10% infected, 30% affected) of the population. Total excess deaths were scaled up to the population of England aged 30+ consisting of 35 million individuals using England mortality estimates for incident cancers.



Figure S9. Total (direct and indirect) excess deaths for prevalent cancers by cancer site and number of comorbidities over a 1-year period. Stacked bar chart indicates the proportion of individuals with 0, 1, 2 and 3+ comorbidities by cancer site. We estimated total excess deaths for 40% (10% infected, 30% affected) of the population. Total excess deaths were scaled up to the population of England aged 30+ consisting of 35 million individuals using England mortality estimates for prevalent cancers.

1  
2  
3  
4  
5  
6  
7  
8  
9  
10  
11  
12  
13  
14  
15  
16  
17  
18  
19  
20  
21  
22  
23  
24  
25  
26  
27  
28  
29  
30  
31  
32  
33  
34  
35  
36  
37  
38  
39  
40  
41  
42  
43  
44  
45  
46  
47  
48  
49  
50  
51  
52  
53  
54  
55  
56  
57  
58  
59  
60

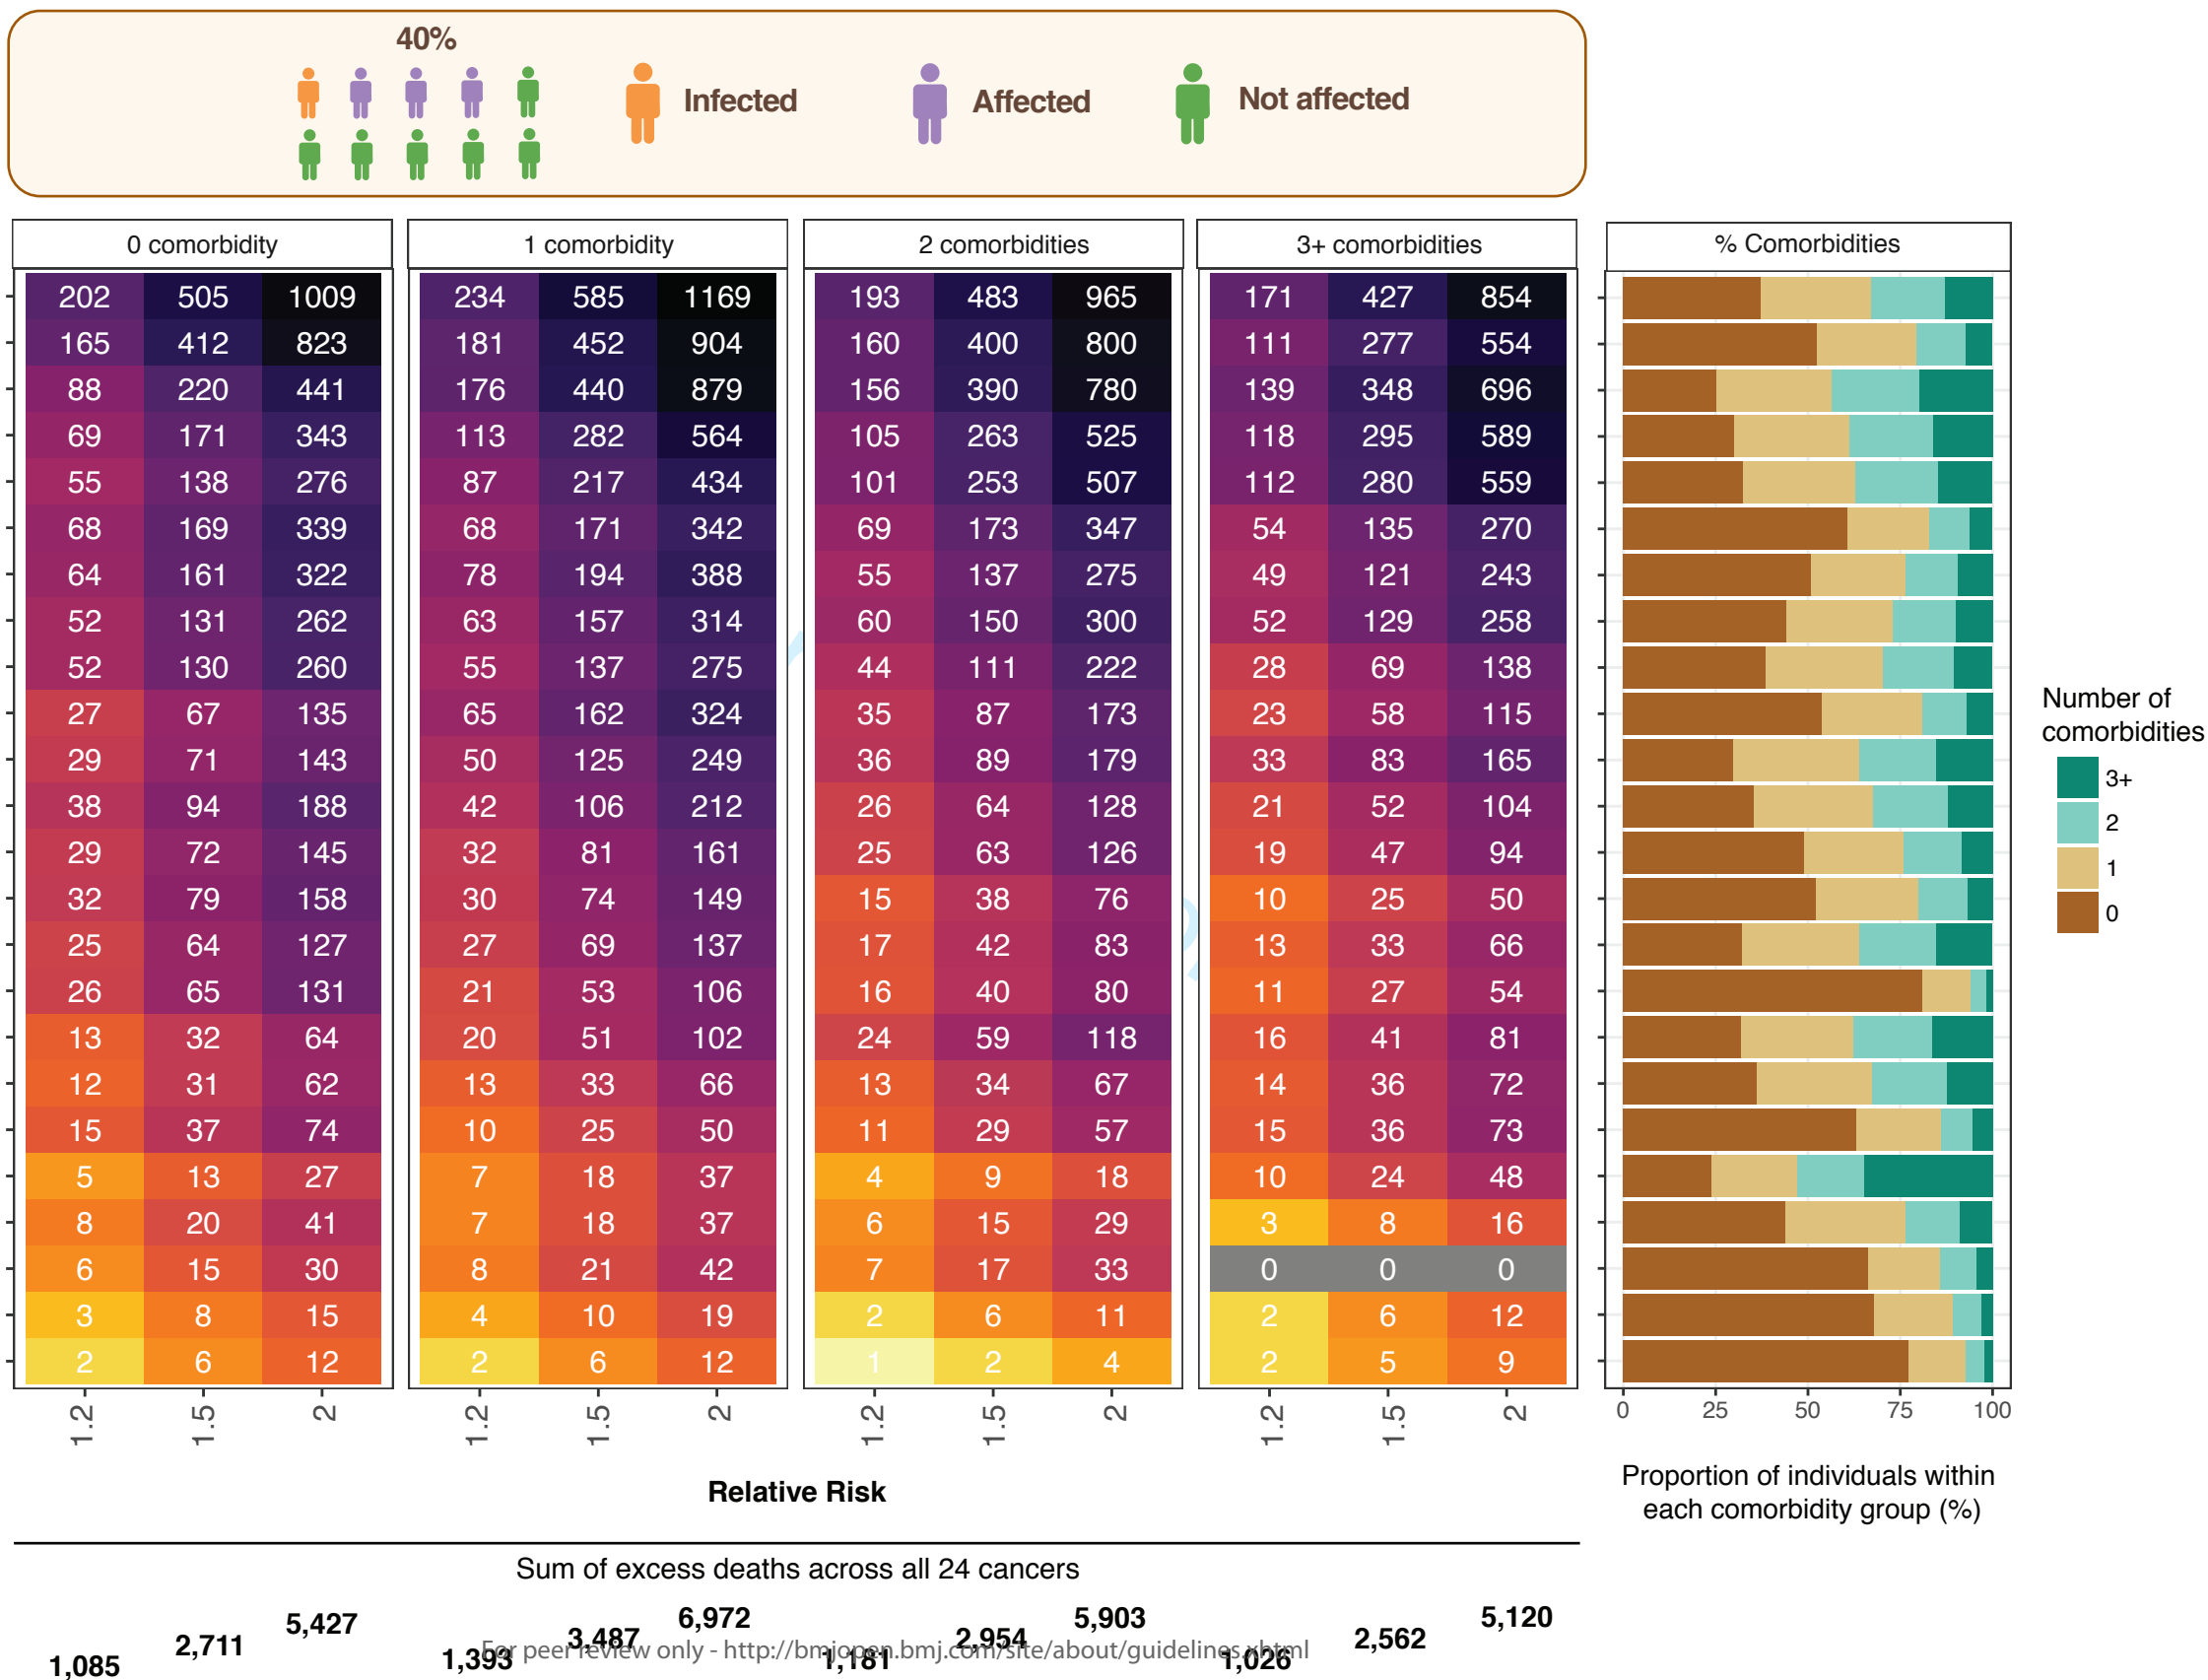

STROBE Statement—Checklist of items that should be included in reports of *cohort studies*

|                              | Item No | Recommendation                                                                                                                                                                                                                                                                                                                                            |
|------------------------------|---------|-----------------------------------------------------------------------------------------------------------------------------------------------------------------------------------------------------------------------------------------------------------------------------------------------------------------------------------------------------------|
| <b>Title and abstract</b>    | 1       | (a) Indicate the study's design with a commonly used term in the title or the abstract ( <b>p. 2</b> )<br>(b) Provide in the abstract an informative and balanced summary of what was done and what was found ( <b>p. 3</b> )                                                                                                                             |
| <b>Introduction</b>          |         |                                                                                                                                                                                                                                                                                                                                                           |
| Background/rationale         | 2       | Explain the scientific background and rationale for the investigation being reported ( <b>pp. 4</b> )                                                                                                                                                                                                                                                     |
| Objectives                   | 3       | State specific objectives, including any prespecified hypotheses ( <b>p. 4</b> )                                                                                                                                                                                                                                                                          |
| <b>Methods</b>               |         |                                                                                                                                                                                                                                                                                                                                                           |
| Study design                 | 4       | Present key elements of study design early in the paper ( <b>pp. 5</b> )                                                                                                                                                                                                                                                                                  |
| Setting                      | 5       | Describe the setting, locations, and relevant dates, including periods of recruitment, exposure, follow-up, and data collection ( <b>pp. 5</b> )                                                                                                                                                                                                          |
| Participants                 | 6       | (a) Give the eligibility criteria, and the sources and methods of selection of participants. Describe methods of follow-up ( <b>pp. 5</b> )<br>(b) For matched studies, give matching criteria and number of exposed and unexposed (-)                                                                                                                    |
| Variables                    | 7       | Clearly define all outcomes, exposures, predictors, potential confounders, and effect modifiers. Give diagnostic criteria, if applicable ( <b>pp. 5-7</b> )                                                                                                                                                                                               |
| Data sources/<br>measurement | 8*      | For each variable of interest, give sources of data and details of methods of assessment (measurement). Describe comparability of assessment methods if there is more than one group ( <b>pp. 5</b> )                                                                                                                                                     |
| Bias                         | 9       | Describe any efforts to address potential sources of bias (-)                                                                                                                                                                                                                                                                                             |
| Study size                   | 10      | Explain how the study size was arrived at ( <b>pp. 5</b> )                                                                                                                                                                                                                                                                                                |
| Quantitative variables       | 11      | Explain how quantitative variables were handled in the analyses. If applicable, describe which groupings were chosen and why ( <b>pp. 5-7</b> )                                                                                                                                                                                                           |
| Statistical methods          | 12      | (a) Describe all statistical methods, including those used to control for confounding ( <b>pp. 5-7</b> )<br>(b) Describe any methods used to examine subgroups and interactions (-)<br>(c) Explain how missing data were addressed (-)<br>(d) If applicable, explain how loss to follow-up was addressed (-)<br>(e) Describe any sensitivity analyses (-) |
| <b>Results</b>               |         |                                                                                                                                                                                                                                                                                                                                                           |
| Participants                 | 13*     | (a) Report numbers of individuals at each stage of study—eg numbers potentially eligible, examined for eligibility, confirmed eligible, included in the study, completing follow-up, and analysed ( <b>pp. 8-9</b> )<br>(b) Give reasons for non-participation at each stage (-)<br>(c) Consider use of a flow diagram (-)                                |
| Descriptive data             | 14*     | (a) Give characteristics of study participants (eg demographic, clinical, social) and information on exposures and potential confounders ( <b>pp. 5-7</b> )<br>(b) Indicate number of participants with missing data for each variable of interest (-)<br>(c) Summarise follow-up time (eg, average and total amount) (-)                                 |
| Outcome data                 | 15*     | Report numbers of outcome events or summary measures over time ( <b>pp. 5-7</b> )                                                                                                                                                                                                                                                                         |
| Main results                 | 16      | (a) Give unadjusted estimates and, if applicable, confounder-adjusted estimates and their precision (eg, 95% confidence interval). Make clear which confounders were adjusted for and why they were included ( <b>pp. 8-9</b> )                                                                                                                           |



|                          |    |                                                                                                                                                                                              |
|--------------------------|----|----------------------------------------------------------------------------------------------------------------------------------------------------------------------------------------------|
|                          |    | (b) Report category boundaries when continuous variables were categorized (-)                                                                                                                |
|                          |    | (c) If relevant, consider translating estimates of relative risk into absolute risk for a meaningful time period (-)                                                                         |
| Other analyses           | 17 | Report other analyses done—eg analyses of subgroups and interactions, and sensitivity analyses (-)                                                                                           |
| <b>Discussion</b>        |    |                                                                                                                                                                                              |
| Key results              | 18 | Summarise key results with reference to study objectives ( <b>pp. 10</b> )                                                                                                                   |
| Limitations              | 19 | Discuss limitations of the study, taking into account sources of potential bias or imprecision. Discuss both direction and magnitude of any potential bias ( <b>pp. 11</b> )                 |
| Interpretation           | 20 | Give a cautious overall interpretation of results considering objectives, limitations, multiplicity of analyses, results from similar studies, and other relevant evidence ( <b>pp. 11</b> ) |
| Generalisability         | 21 | Discuss the generalisability (external validity) of the study results ( <b>p. 12</b> )                                                                                                       |
| <b>Other information</b> |    |                                                                                                                                                                                              |
| Funding                  | 22 | Give the source of funding and the role of the funders for the present study and, if applicable, for the original study on which the present article is based ( <b>pp. 14-15</b> )           |
