# Supplementary material for: Estimated impact of the COVID-19 pandemic on cancer services and excess 1-year mortality in people with cancer and multimorbidity: near real-time data on cancer care, cancer deaths and a population-based cohort study
Source: PubMed Central journal article supplement (PMC7674020; doi:10.1136/bmjopen-2020-043828), 2020-11-17
Supplement: bmjopen-2020-043828.reviewer_comments.pdf [file bmjopen-2020-043828.reviewer_comments.pdf]

## PEER REVIEW HISTORY

BMJ Open publishes all reviews undertaken for accepted manuscripts. Reviewers are asked to complete a checklist review form (<http://bmjopen.bmj.com/site/about/resources/checklist.pdf>) and are provided with free text boxes to elaborate on their assessment. These free text comments are reproduced below.

### ARTICLE DETAILS

|                            |                                                                                                                                                                                                                                                                                                                                                                                                                                                                            |
|----------------------------|----------------------------------------------------------------------------------------------------------------------------------------------------------------------------------------------------------------------------------------------------------------------------------------------------------------------------------------------------------------------------------------------------------------------------------------------------------------------------|
| <b>TITLE (PROVISIONAL)</b> | Estimated impact of the Covid-19 pandemic on cancer services and excess 1-year mortality in people with cancer and multimorbidity: near-real-time data on cancer care, cancer deaths and a population-based cohort study                                                                                                                                                                                                                                                   |
| <b>AUTHORS</b>             | Lai, Alvina; Pasea, Laura; Banerjee, Amitava; Hall, Geoff; Denaxas, S; Chang, Wai Hoong; Katsoulis, M; Williams, Bryan; Pillay, Deenan; Noursadeghi, Mahdad; Linch, David; Hughes, Derralyne; Forster, Martin; Turnbull, Clare; Fitzpatrick, Natalie; Boyd, Kathryn; Foster, Graham; Enver, Tariq; Nafilyan, Vahe; Humberstone, Ben; Neal, Richard; Cooper, Matt; Jones, Monica; Pritchard-Jones, Kathy; Sullivan, Richard; Davie, Charlie; Lawler, Mark; Hemingway, Harry |

### VERSION 1 – REVIEW

|                        |                                                                         |
|------------------------|-------------------------------------------------------------------------|
| <b>REVIEWER</b>        | Zhi Ven Fong, MD, MPH<br>Massachusetts General Hospital, United States. |
| <b>REVIEW RETURNED</b> | 06-Oct-2020                                                             |

|                         |                                                                                                                                                                                                                                                                                                                  |
|-------------------------|------------------------------------------------------------------------------------------------------------------------------------------------------------------------------------------------------------------------------------------------------------------------------------------------------------------|
| <b>GENERAL COMMENTS</b> | <p>The authors should be commended for the amount of effort placed in revising the manuscript.</p> <p>The paper in its current draft is more complete, and makes for a clearer illustration of the valuable findings that the authors have noted for the journal's readers.</p> <p>It's also a clearer read.</p> |
|-------------------------|------------------------------------------------------------------------------------------------------------------------------------------------------------------------------------------------------------------------------------------------------------------------------------------------------------------|

### VERSION 1 – AUTHOR RESPONSE

This paper has been accepted for publication.

As requested, figures and supplementary figures citations are now all in ascending orders.
